# Supplementary material for: The Mitochondrial Genomes of 18 New Pleurosticti (Coleoptera: Scarabaeidae) Exhibit a Novel trnQ-NCR-trnI-trnM Gene Rearrangement and Clarify Phylogenetic Relationships of Subfamilies within Scarabaeidae
Source: MDPI journal article supplement (doi:10.3390/insects12111025), 2021-11-14
Supplement: s1 [file s1]

Table S1: The partition schemes and best-fitting models selected of 13 mitochondrial PCGs and AAs.

A. Nucleotide sequence alignments

| Subset      | Best model | Subset partitions                                               |
|-------------|------------|-----------------------------------------------------------------|
| Partition1  | GTR+I+G    | cox2_codon1, cox3_codon1, cytb_codon1, atp6_codon1              |
| Partition2  | TVM+I+G    | cox2_codon2, cytb_codon2, atp6_codon2, cox1_codon2, cox3_codon2 |
| Partition3  | TRN+I+G    | nad3_codon3, atp6_codon3, atp8_codon3, nad6_codon3              |
| Partition4  | GTR+I+G    | atp8_codon1, nad2_codon1, nad6_codon1, nad3_codon1              |
| Partition5  | TVM+I+G    | nad3_codon2, nad2_codon2, nad6_codon2, atp8_codon2              |
| Partition6  | SYM+G      | cox1_codon1                                                     |
| Partition7  | TVM+G      | cytb_codon3, cox3_codon3, cox2_codon3, cox1_codon3              |
| Partition8  | GTR+I+G    | nad4L_codon1, nad4_codon1, nad5_codon1, nad1_codon1             |
| Partition9  | GTR+I+G    | nad4L_codon2, nad1_codon2, nad4_codon2, nad5_codon2             |
| Partition10 | GTR+I+G    | nad4_codon3, nad1_codon3, nad5_codon3, nad4L_codon3             |
| Partition11 | HKY+G      | nad2_codon3                                                     |

B. Amino Acid sequence alignments

| Subset     | Best model  | Subset partitions      |
|------------|-------------|------------------------|
| Partition1 | MTART+I+G   | cox3, atp6, cytb       |
| Partition2 | MTREV+I+G+F | atp8, nad3, nad2, nad6 |
| Partition3 | MTART+I+G   | cox1                   |
| Partition4 | MTMAM+I+G   | cox2                   |
| Partition5 | MTART+I+G   | nad5, nad1             |
| Partition6 | MTART+I+G   | nad4, nad4L            |
