# Supplementary material for: The Mitochondrial Genomes of 18 New Pleurosticti (Coleoptera: Scarabaeidae) Exhibit a Novel trnQ-NCR-trnI-trnM Gene Rearrangement and Clarify Phylogenetic Relationships of Subfamilies within Scarabaeidae
Source: MDPI journal article supplement (doi:10.3390/insects12111025), 2021-11-14
Supplement: s1 [file s1]

Table S7. Characteristics of the putative tandem repeats in the control region of Cetoniinae and Dynastinae species mitogenome.

Table Explanation

*Protaetia speciosa jousselini*

| Indices                    | Period Size | Copy Number | Consensus Size | Percent Matches | Percent Indels | Score | A  | C  | G | T  | Entropy (0-2) |
|----------------------------|-------------|-------------|----------------|-----------------|----------------|-------|----|----|---|----|---------------|
| <a href="#">31--94</a>     | 13          | 4.9         | 14             | 76              | 19             | 50    | 51 | 3  | 4 | 40 | 1.38          |
| <a href="#">222--462</a>   | 119         | 2.0         | 119            | 96              | 0              | 448   | 42 | 22 | 4 | 29 | 1.73          |
| <a href="#">729--1013</a>  | 83          | 3.4         | 83             | 99              | 0              | 561   | 35 | 16 | 4 | 43 | 1.70          |
| <a href="#">1355--1418</a> | 2           | 33.0        | 2              | 75              | 12             | 53    | 43 | 1  | 4 | 50 | 1.32          |
| <a href="#">1652--1712</a> | 25          | 2.4         | 25             | 78              | 15             | 72    | 52 | 4  | 0 | 42 | 1.23          |
| <a href="#">1742--1772</a> | 16          | 1.9         | 16             | 93              | 0              | 53    | 48 | 3  | 0 | 48 | 1.17          |

Table Explanation

*Cyprolais quadrimaculata*

| Indices                    | Period Size | Copy Number | Consensus Size | Percent Matches | Percent Indels | Score | A  | C  | G | T  | Entropy (0-2) |
|----------------------------|-------------|-------------|----------------|-----------------|----------------|-------|----|----|---|----|---------------|
| <a href="#">572--777</a>   | 79          | 2.6         | 79             | 100             | 0              | 412   | 33 | 12 | 4 | 48 | 1.62          |
| <a href="#">861--909</a>   | 25          | 1.9         | 26             | 84              | 12             | 66    | 42 | 2  | 4 | 51 | 1.32          |
| <a href="#">1103--1134</a> | 14          | 2.4         | 14             | 90              | 10             | 50    | 34 | 0  | 0 | 65 | 0.93          |
| <a href="#">1402--1467</a> | 17          | 3.8         | 17             | 75              | 15             | 55    | 56 | 0  | 3 | 40 | 1.15          |
| <a href="#">1489--1537</a> | 21          | 2.4         | 20             | 87              | 12             | 73    | 53 | 2  | 6 | 38 | 1.38          |

Table Explanation

*Dicronorhina derbyana*

| Indices                    | Period Size | Copy Number | Consensus Size | Percent Matches | Percent Indels | Score | A  | C  | G | T  | Entropy (0-2) |
|----------------------------|-------------|-------------|----------------|-----------------|----------------|-------|----|----|---|----|---------------|
| <a href="#">572--777</a>   | 79          | 2.6         | 79             | 100             | 0              | 412   | 33 | 12 | 4 | 48 | 1.62          |
| <a href="#">861--909</a>   | 25          | 1.9         | 26             | 84              | 12             | 66    | 42 | 2  | 4 | 51 | 1.32          |
| <a href="#">1103--1134</a> | 14          | 2.4         | 14             | 90              | 10             | 50    | 34 | 0  | 0 | 65 | 0.93          |
| <a href="#">1402--1467</a> | 17          | 3.8         | 17             | 75              | 15             | 55    | 56 | 0  | 3 | 40 | 1.15          |
| <a href="#">1489--1537</a> | 21          | 2.4         | 20             | 87              | 12             | 73    | 53 | 2  | 6 | 38 | 1.38          |

Table Explanation

*Eudicella euthalia oweni*

| Indices                    | Period Size | Copy Number | Consensus Size | Percent Matches | Percent Indels | Score | A  | C  | G | T  | Entropy (0-2) |
|----------------------------|-------------|-------------|----------------|-----------------|----------------|-------|----|----|---|----|---------------|
| <a href="#">247--276</a>   | 2           | 15.0        | 2              | 100             | 0              | 60    | 50 | 0  | 0 | 50 | 1.00          |
| <a href="#">323--1999</a>  | 259         | 6.5         | 259            | 97              | 0              | 2899  | 46 | 17 | 4 | 29 | 1.67          |
| <a href="#">2669--2705</a> | 13          | 2.6         | 15             | 87              | 8              | 51    | 45 | 2  | 0 | 51 | 1.15          |
| <a href="#">3016--3077</a> | 18          | 3.5         | 18             | 77              | 14             | 58    | 56 | 0  | 0 | 43 | 0.99          |
| <a href="#">3037--3077</a> | 8           | 4.7         | 9              | 79              | 14             | 50    | 53 | 0  | 0 | 46 | 1.00          |
| <a href="#">3035--3074</a> | 10          | 4.2         | 10             | 76              | 23             | 50    | 52 | 0  | 0 | 47 | 1.00          |
| <a href="#">3037--3074</a> | 20          | 1.9         | 20             | 94              | 0              | 67    | 52 | 0  | 0 | 47 | 1.00          |
| <a href="#">3120--3152</a> | 12          | 2.5         | 14             | 85              | 14             | 52    | 48 | 0  | 0 | 51 | 1.00          |

Table Explanation

*Eudicella smithi*

| Indices                    | Period Size | Copy Number | Consensus Size | Percent Matches | Percent Indels | Score | A  | C | G | T  | Entropy (0-2) |
|----------------------------|-------------|-------------|----------------|-----------------|----------------|-------|----|---|---|----|---------------|
| <a href="#">1429--1490</a> | 18          | 3.5         | 18             | 77              | 14             | 58    | 56 | 0 | 0 | 43 | 0.99          |
| <a href="#">1450--1490</a> | 8           | 4.7         | 9              | 79              | 14             | 50    | 53 | 0 | 0 | 46 | 1.00          |
| <a href="#">1448--1487</a> | 10          | 4.2         | 10             | 76              | 23             | 50    | 52 | 0 | 0 | 47 | 1.00          |
| <a href="#">1450--1487</a> | 20          | 1.9         | 20             | 94              | 0              | 67    | 52 | 0 | 0 | 47 | 1.00          |

Table Explanation

*Goliathus goliatus*

| Indices                    | Period Size | Copy Number | Consensus Size | Percent Matches | Percent Indels | Score | A  | C  | G | T  | Entropy (0-2) |
|----------------------------|-------------|-------------|----------------|-----------------|----------------|-------|----|----|---|----|---------------|
| <a href="#">264--551</a>   | 93          | 3.1         | 93             | 93              | 2              | 481   | 38 | 26 | 3 | 31 | 1.73          |
| <a href="#">430--1177</a>  | 313         | 2.4         | 313            | 98              | 0              | 1433  | 40 | 18 | 5 | 35 | 1.73          |
| <a href="#">1056--1363</a> | 93          | 3.3         | 93             | 94              | 0              | 546   | 37 | 23 | 5 | 32 | 1.78          |
| <a href="#">1555--2048</a> | 93          | 5.3         | 93             | 94              | 0              | 873   | 38 | 25 | 4 | 31 | 1.75          |
| <a href="#">743--1862</a>  | 499         | 2.2         | 499            | 95              | 0              | 2046  | 39 | 20 | 5 | 34 | 1.75          |
| <a href="#">2240--2436</a> | 91          | 2.1         | 93             | 93              | 1              | 335   | 38 | 24 | 5 | 31 | 1.77          |
| <a href="#">2784--2818</a> | 18          | 1.9         | 18             | 88              | 0              | 52    | 37 | 8  | 0 | 54 | 1.31          |
| <a href="#">3190--3294</a> | 23          | 4.6         | 23             | 71              | 17             | 60    | 48 | 1  | 0 | 49 | 1.12          |
| <a href="#">3186--3269</a> | 19          | 4.6         | 19             | 69              | 18             | 54    | 47 | 2  | 0 | 50 | 1.14          |

Table Explanation

*Jumnos ruckeri*

| Indices                    | Period Size | Copy Number | Consensus Size | Percent Matches | Percent Indels | Score | A  | C  | G | T  | Entropy (0-2) |
|----------------------------|-------------|-------------|----------------|-----------------|----------------|-------|----|----|---|----|---------------|
| <a href="#">213--265</a>   | 22          | 2.4         | 22             | 93              | 3              | 88    | 60 | 9  | 1 | 28 | 1.38          |
| <a href="#">340--2058</a>  | 243         | 7.1         | 243            | 99              | 0              | 3357  | 34 | 28 | 8 | 28 | 1.87          |
| <a href="#">2111--3165</a> | 86          | 12.3        | 86             | 95              | 0              | 1772  | 34 | 28 | 9 | 26 | 1.88          |
| <a href="#">3388--3514</a> | 40          | 3.2         | 40             | 63              | 14             | 107   | 35 | 17 | 5 | 41 | 1.73          |
| <a href="#">3401--3528</a> | 41          | 3.1         | 41             | 63              | 14             | 111   | 33 | 17 | 6 | 42 | 1.75          |
| <a href="#">3355--3570</a> | 81          | 2.7         | 81             | 100             | 0              | 432   | 33 | 13 | 6 | 46 | 1.69          |

Table Explanation

*Mecynorhina Polyphemus*

| Indices                    | Period Size | Copy Number | Consensus Size | Percent Matches | Percent Indels | Score | A  | C  | G | T  | Entropy (0-2) |
|----------------------------|-------------|-------------|----------------|-----------------|----------------|-------|----|----|---|----|---------------|
| <a href="#">297--546</a>   | 81          | 3.1         | 81             | 92              | 5              | 418   | 39 | 14 | 3 | 43 | 1.61          |
| <a href="#">920--1094</a>  | 46          | 3.8         | 45             | 68              | 18             | 119   | 48 | 2  | 0 | 49 | 1.18          |
| <a href="#">964--1088</a>  | 27          | 4.3         | 29             | 67              | 20             | 73    | 48 | 2  | 0 | 48 | 1.20          |
| <a href="#">1174--1218</a> | 21          | 2.0         | 21             | 83              | 12             | 54    | 60 | 0  | 4 | 35 | 1.17          |
| <a href="#">1168--1220</a> | 22          | 2.5         | 20             | 76              | 14             | 52    | 58 | 0  | 3 | 37 | 1.16          |

Table Explanation

*Mecynorhina torquata ugandensis*

| Indices                    | Period Size | Copy Number | Consensus Size | Percent Matches | Percent Indels | Score | A  | C  | G | T  | Entropy (0-2) |
|----------------------------|-------------|-------------|----------------|-----------------|----------------|-------|----|----|---|----|---------------|
| <a href="#">264--551</a>   | 93          | 3.1         | 93             | 93              | 2              | 481   | 38 | 26 | 3 | 31 | 1.73          |
| <a href="#">430--1178</a>  | 313         | 2.4         | 313            | 98              | 0              | 1435  | 40 | 18 | 5 | 35 | 1.73          |
| <a href="#">1277--1311</a> | 18          | 1.9         | 18             | 88              | 0              | 52    | 37 | 8  | 0 | 54 | 1.31          |
| <a href="#">1683--1787</a> | 23          | 4.6         | 23             | 71              | 17             | 60    | 48 | 1  | 0 | 49 | 1.12          |
| <a href="#">1679--1762</a> | 19          | 4.6         | 19             | 69              | 18             | 54    | 47 | 2  | 0 | 50 | 1.14          |

Table Explanation

*Chalcosoma caucasus caucasus*

| Indices                    | Period Size | Copy Number | Consensus Size | Percent Matches | Percent Indels | Score | A  | C  | G  | T  | Entropy (0-2) |
|----------------------------|-------------|-------------|----------------|-----------------|----------------|-------|----|----|----|----|---------------|
| <a href="#">107--1283</a>  | 82          | 14.4        | 82             | 95              | 0              | 1886  | 42 | 16 | 8  | 29 | 1.77          |
| <a href="#">1283--1717</a> | 125         | 3.5         | 125            | 97              | 0              | 825   | 39 | 23 | 1  | 35 | 1.66          |
| <a href="#">3331--3375</a> | 10          | 4.4         | 10             | 83              | 5              | 54    | 51 | 11 | 11 | 26 | 1.71          |
| <a href="#">3648--3689</a> | 21          | 2.0         | 22             | 85              | 4              | 59    | 42 | 2  | 0  | 54 | 1.13          |
| <a href="#">3659--3760</a> | 21          | 4.8         | 22             | 76              | 21             | 87    | 44 | 2  | 0  | 51 | 1.23          |
| <a href="#">3770--3820</a> | 25          | 2.0         | 25             | 84              | 7              | 66    | 47 | 5  | 1  | 45 | 1.38          |
| <a href="#">3964--4064</a> | 15          | 6.8         | 14             | 67              | 15             | 51    | 45 | 0  | 2  | 51 | 1.16          |

Table Explanation

*Dynastes hercules hercules*

| Indices                  | Period Size | Copy Number | Consensus Size | Percent Matches | Percent Indels | Score | A  | C  | G  | T  | Entropy (0-2) |
|--------------------------|-------------|-------------|----------------|-----------------|----------------|-------|----|----|----|----|---------------|
| <a href="#">90--1181</a> | 72          | 15.2        | 72             | 98              | 0              | 1788  | 21 | 23 | 18 | 31 | 1.95          |

Table Explanation

*Megasoma elephas elephas*

| Indices                  | Period Size | Copy Number | Consensus Size | Percent Matches | Percent Indels | Score | A  | C  | G  | T  | Entropy (0-2) |
|--------------------------|-------------|-------------|----------------|-----------------|----------------|-------|----|----|----|----|---------------|
| <a href="#">180--713</a> | 198         | 2.7         | 198            | 99              | 0              | 1059  | 33 | 29 | 11 | 26 | 1.90          |

Table Explanation

*Megosoma mars*

| Indices                  | Period Size | Copy Number | Consensus Size | Percent Matches | Percent Indels | Score | A  | C  | G  | T  | Entropy (0-2) |
|--------------------------|-------------|-------------|----------------|-----------------|----------------|-------|----|----|----|----|---------------|
| <a href="#">183--914</a> | 198         | 3.7         | 198            | 99              | 0              | 1437  | 33 | 29 | 11 | 25 | 1.90          |

Table Explanation

*Oryctes nasicornis*

| Indices                    | Period Size | Copy Number | Consensus Size | Percent Matches | Percent Indels | Score | A  | C  | G  | T  | Entropy (0-2) |
|----------------------------|-------------|-------------|----------------|-----------------|----------------|-------|----|----|----|----|---------------|
| <a href="#">535--887</a>   | 186         | 1.9         | 186            | 96              | 0              | 652   | 43 | 24 | 6  | 25 | 1.79          |
| <a href="#">861--1733</a>  | 273         | 3.2         | 273            | 99              | 0              | 1692  | 29 | 31 | 11 | 26 | 1.91          |
| <a href="#">1747--2574</a> | 186         | 4.5         | 186            | 99              | 0              | 1602  | 43 | 23 | 7  | 25 | 1.79          |
| <a href="#">2788--2845</a> | 12          | 4.4         | 13             | 77              | 18             | 50    | 50 | 3  | 0  | 46 | 1.18          |
| <a href="#">2788--2844</a> | 14          | 4.5         | 13             | 77              | 14             | 57    | 49 | 3  | 0  | 47 | 1.18          |
| <a href="#">2787--2842</a> | 26          | 2.3         | 23             | 82              | 14             | 60    | 50 | 3  | 0  | 46 | 1.19          |
| <a href="#">3697--3754</a> | 12          | 4.4         | 13             | 77              | 18             | 50    | 50 | 3  | 0  | 46 | 1.18          |
| <a href="#">3697--3753</a> | 14          | 4.5         | 13             | 77              | 14             | 57    | 49 | 3  | 0  | 47 | 1.18          |
| <a href="#">3696--3751</a> | 26          | 2.3         | 23             | 82              | 14             | 60    | 50 | 3  | 0  | 46 | 1.19          |
| <a href="#">4606--4663</a> | 12          | 4.4         | 13             | 77              | 18             | 50    | 50 | 3  | 0  | 46 | 1.18          |
| <a href="#">4606--4662</a> | 14          | 4.5         | 13             | 77              | 14             | 57    | 49 | 3  | 0  | 47 | 1.18          |
| <a href="#">4605--4660</a> | 26          | 2.3         | 23             | 82              | 14             | 60    | 50 | 3  | 0  | 46 | 1.19          |

Table Explanation

*Xylotrupes beckeri intermedius*

| Indices                    | Period Size | Copy Number | Consensus Size | Percent Matches | Percent Indels | Score | A  | C  | G | T  | Entropy (0-2) |
|----------------------------|-------------|-------------|----------------|-----------------|----------------|-------|----|----|---|----|---------------|
| <a href="#">257--1395</a>  | 124         | 9.2         | 124            | 84              | 3              | 1045  | 39 | 18 | 3 | 38 | 1.67          |
| <a href="#">687--1452</a>  | 374         | 2.0         | 371            | 97              | 0              | 1433  | 38 | 21 | 3 | 36 | 1.70          |
| <a href="#">687--1452</a>  | 125         | 6.2         | 125            | 86              | 3              | 1046  | 38 | 21 | 3 | 36 | 1.70          |
| <a href="#">2820--2868</a> | 10          | 4.9         | 10             | 75              | 24             | 50    | 46 | 2  | 0 | 51 | 1.12          |
| <a href="#">2819--2857</a> | 12          | 3.3         | 12             | 82              | 13             | 53    | 48 | 2  | 0 | 48 | 1.15          |
| <a href="#">3127--3235</a> | 46          | 2.3         | 48             | 77              | 15             | 118   | 49 | 2  | 0 | 47 | 1.15          |
| <a href="#">3155--3245</a> | 46          | 2.0         | 46             | 80              | 8              | 105   | 48 | 2  | 1 | 48 | 1.21          |

Table Explanation

*Xylotrupes g. siamensis*

| Indices                    | Period Size | Copy Number | Consensus Size | Percent Matches | Percent Indels | Score | A  | C  | G | T  | Entropy (0-2) |
|----------------------------|-------------|-------------|----------------|-----------------|----------------|-------|----|----|---|----|---------------|
| <a href="#">227--836</a>   | 124         | 4.9         | 124            | 99              | 0              | 1175  | 41 | 14 | 1 | 42 | 1.55          |
| <a href="#">1094--1385</a> | 125         | 2.3         | 125            | 95              | 0              | 521   | 38 | 23 | 2 | 34 | 1.69          |
| <a href="#">1283--1610</a> | 175         | 1.9         | 174            | 88              | 3              | 498   | 38 | 20 | 2 | 39 | 1.65          |
| <a href="#">1872--1926</a> | 20          | 2.9         | 19             | 75              | 25             | 55    | 43 | 7  | 1 | 47 | 1.41          |
| <a href="#">2329--2385</a> | 29          | 1.9         | 30             | 82              | 10             | 73    | 40 | 12 | 3 | 43 | 1.59          |
| <a href="#">2743--2803</a> | 32          | 1.9         | 32             | 82              | 0              | 77    | 47 | 11 | 6 | 34 | 1.66          |
| <a href="#">2900--2945</a> | 22          | 2.1         | 21             | 88              | 4              | 65    | 43 | 2  | 2 | 52 | 1.25          |
| <a href="#">3251--3306</a> | 29          | 2.0         | 27             | 82              | 6              | 67    | 48 | 3  | 0 | 46 | 1.19          |

Table Explanation

*Xylotrupes gideon beckeri*

| Indices                    | Period Size | Copy Number | Consensus Size | Percent Matches | Percent Indels | Score | A  | C  | G | T  | Entropy (0-2) |
|----------------------------|-------------|-------------|----------------|-----------------|----------------|-------|----|----|---|----|---------------|
| <a href="#">218--1262</a>  | 126         | 8.3         | 126            | 88              | 3              | 1405  | 40 | 22 | 2 | 34 | 1.66          |
| <a href="#">218--1262</a>  | 376         | 2.8         | 377            | 92              | 1              | 1668  | 40 | 22 | 2 | 34 | 1.66          |
| <a href="#">1105--1149</a> | 21          | 2.0         | 23             | 83              | 8              | 58    | 40 | 17 | 6 | 35 | 1.76          |
| <a href="#">2692--2807</a> | 22          | 5.3         | 21             | 68              | 26             | 73    | 48 | 1  | 1 | 48 | 1.22          |
| <a href="#">2692--2802</a> | 12          | 9.0         | 12             | 66              | 23             | 61    | 47 | 1  | 1 | 48 | 1.22          |
| <a href="#">2669--2789</a> | 64          | 1.9         | 64             | 81              | 9              | 151   | 45 | 2  | 3 | 48 | 1.32          |
| <a href="#">3019--3094</a> | 15          | 5.1         | 15             | 65              | 16             | 50    | 44 | 0  | 2 | 52 | 1.14          |

Table Explanation

*Xylotrupes g. sumatrensis*

| Indices                    | Period Size | Copy Number | Consensus Size | Percent Matches | Percent Indels | Score | A  | C  | G | T  | Entropy (0-2) |
|----------------------------|-------------|-------------|----------------|-----------------|----------------|-------|----|----|---|----|---------------|
| <a href="#">221--2143</a>  | 126         | 15.3        | 126            | 88              | 3              | 2345  | 40 | 22 | 2 | 35 | 1.67          |
| <a href="#">304--2575</a>  | 125         | 18.1        | 125            | 88              | 3              | 2123  | 39 | 22 | 2 | 35 | 1.69          |
| <a href="#">3948--4063</a> | 22          | 5.3         | 21             | 68              | 26             | 73    | 48 | 1  | 1 | 48 | 1.22          |
| <a href="#">3948--4058</a> | 12          | 9.0         | 12             | 66              | 23             | 61    | 47 | 1  | 1 | 48 | 1.22          |
| <a href="#">3925--4045</a> | 64          | 1.9         | 64             | 81              | 9              | 151   | 45 | 2  | 3 | 48 | 1.32          |
