# Supplementary material for: The Mitochondrial Genomes of 18 New Pleurosticti (Coleoptera: Scarabaeidae) Exhibit a Novel trnQ-NCR-trnI-trnM Gene Rearrangement and Clarify Phylogenetic Relationships of Subfamilies within Scarabaeidae
Source: MDPI journal article supplement (doi:10.3390/insects12111025), 2021-11-14
Supplement: s1 [file s1]

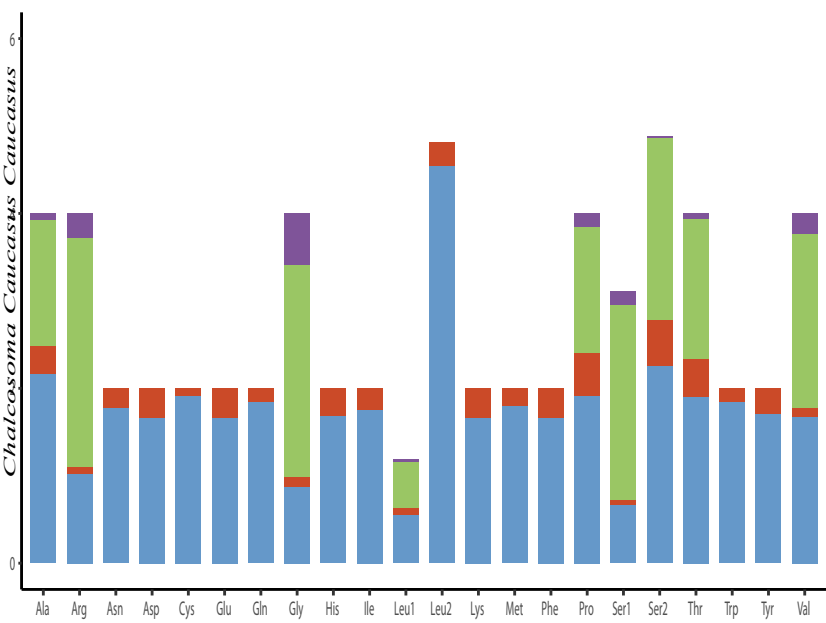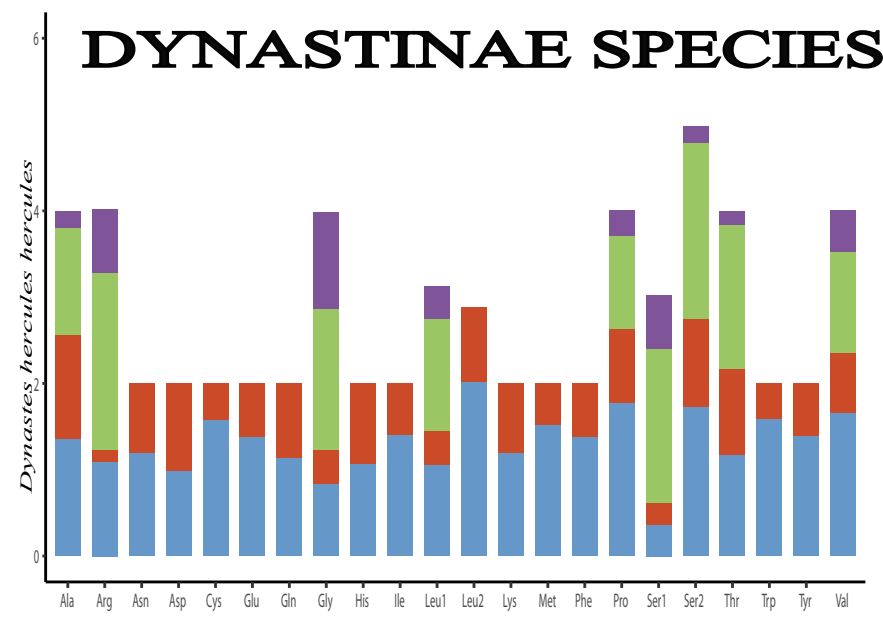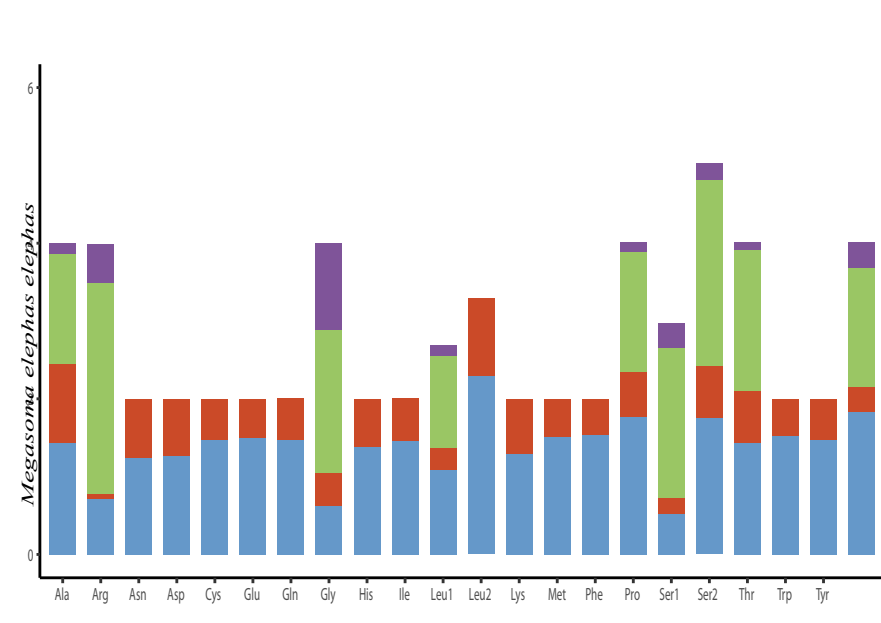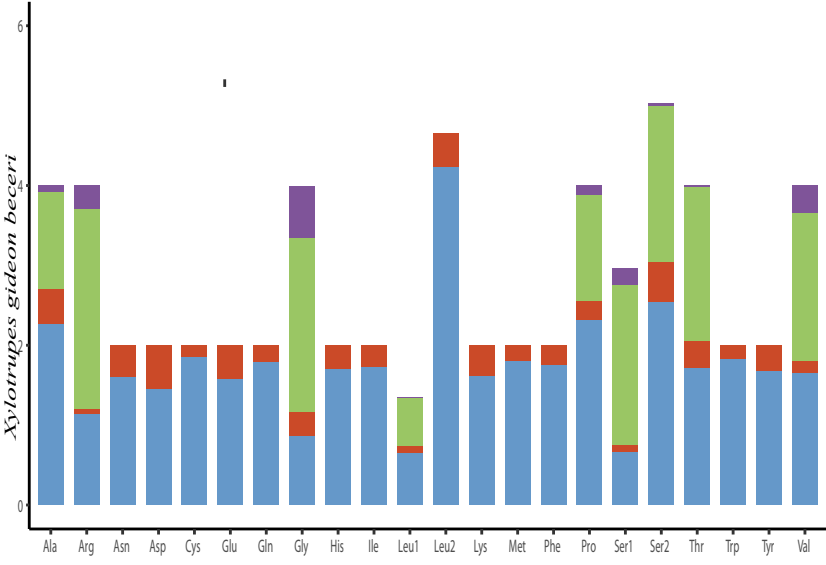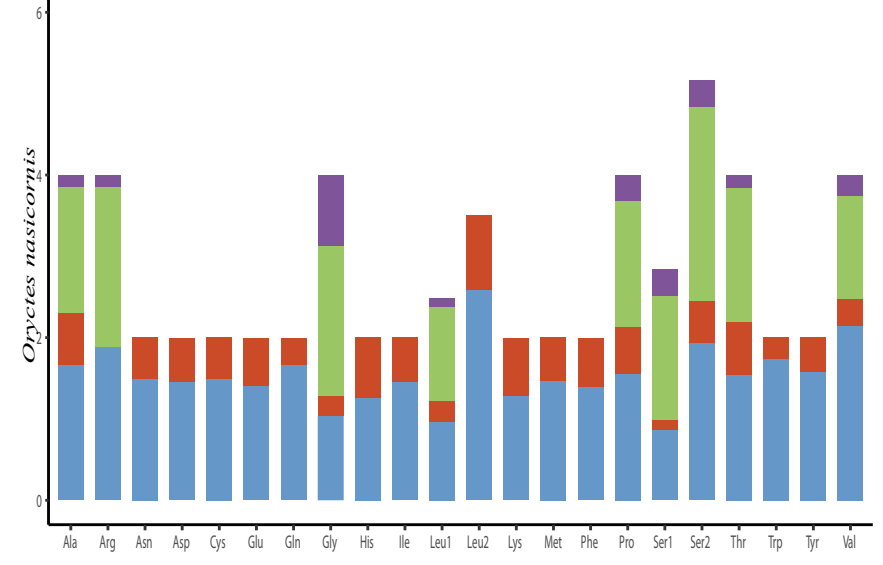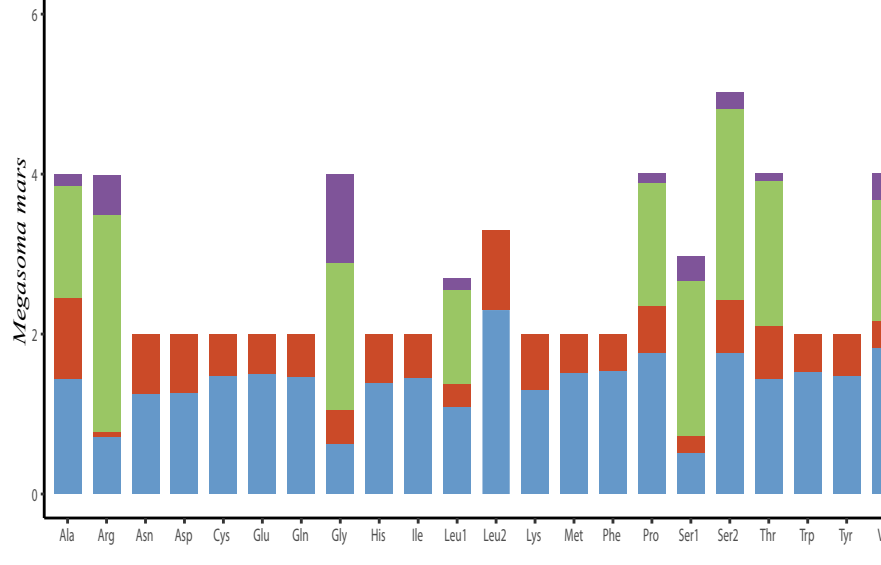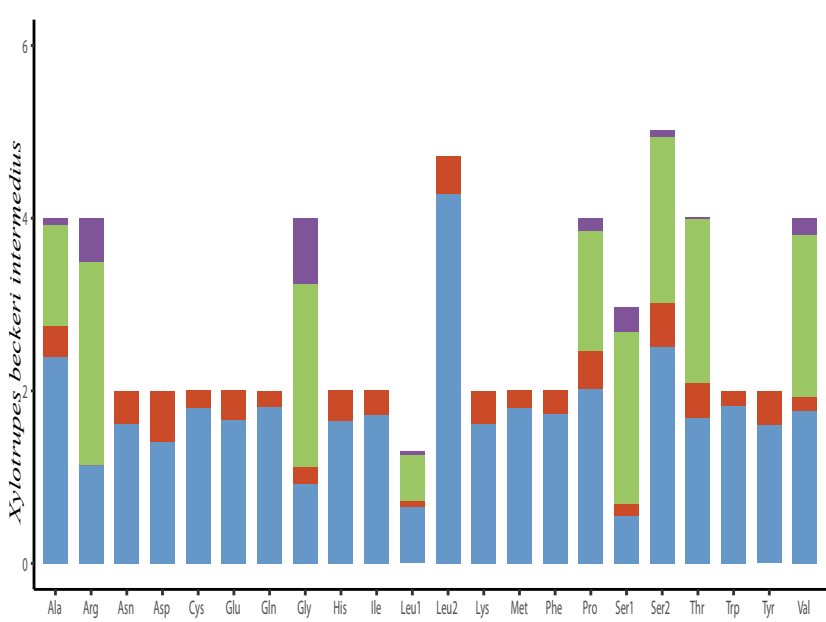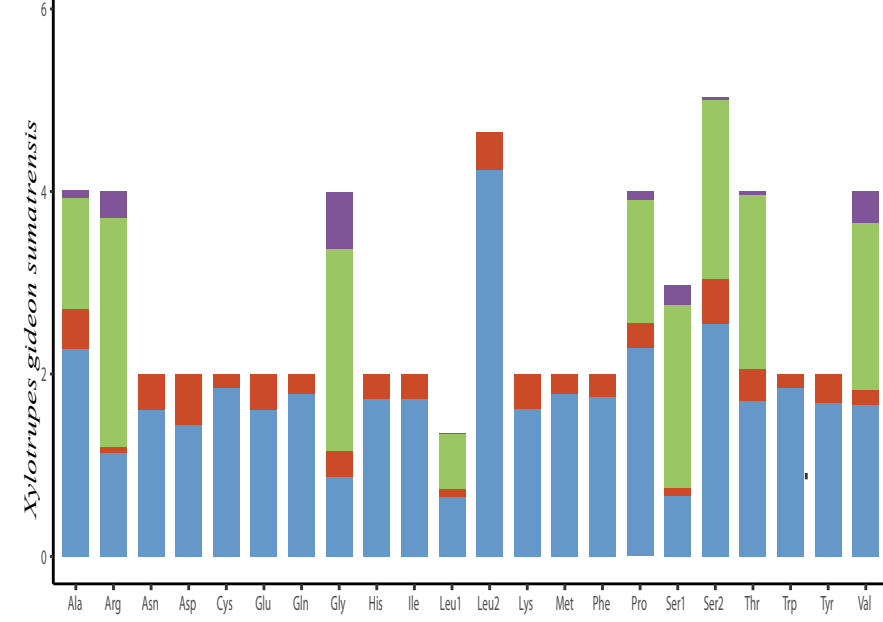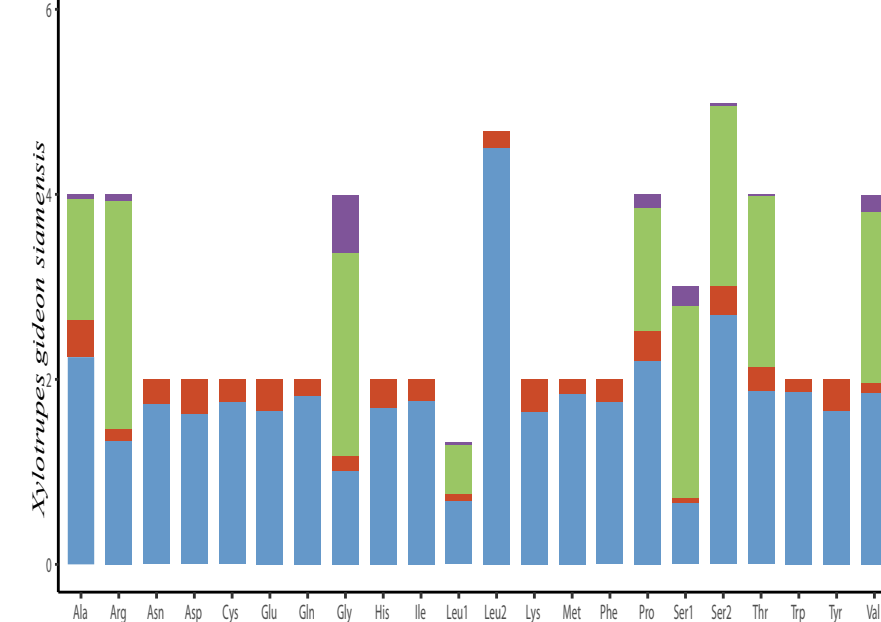

# CETONIINAE SPECIES

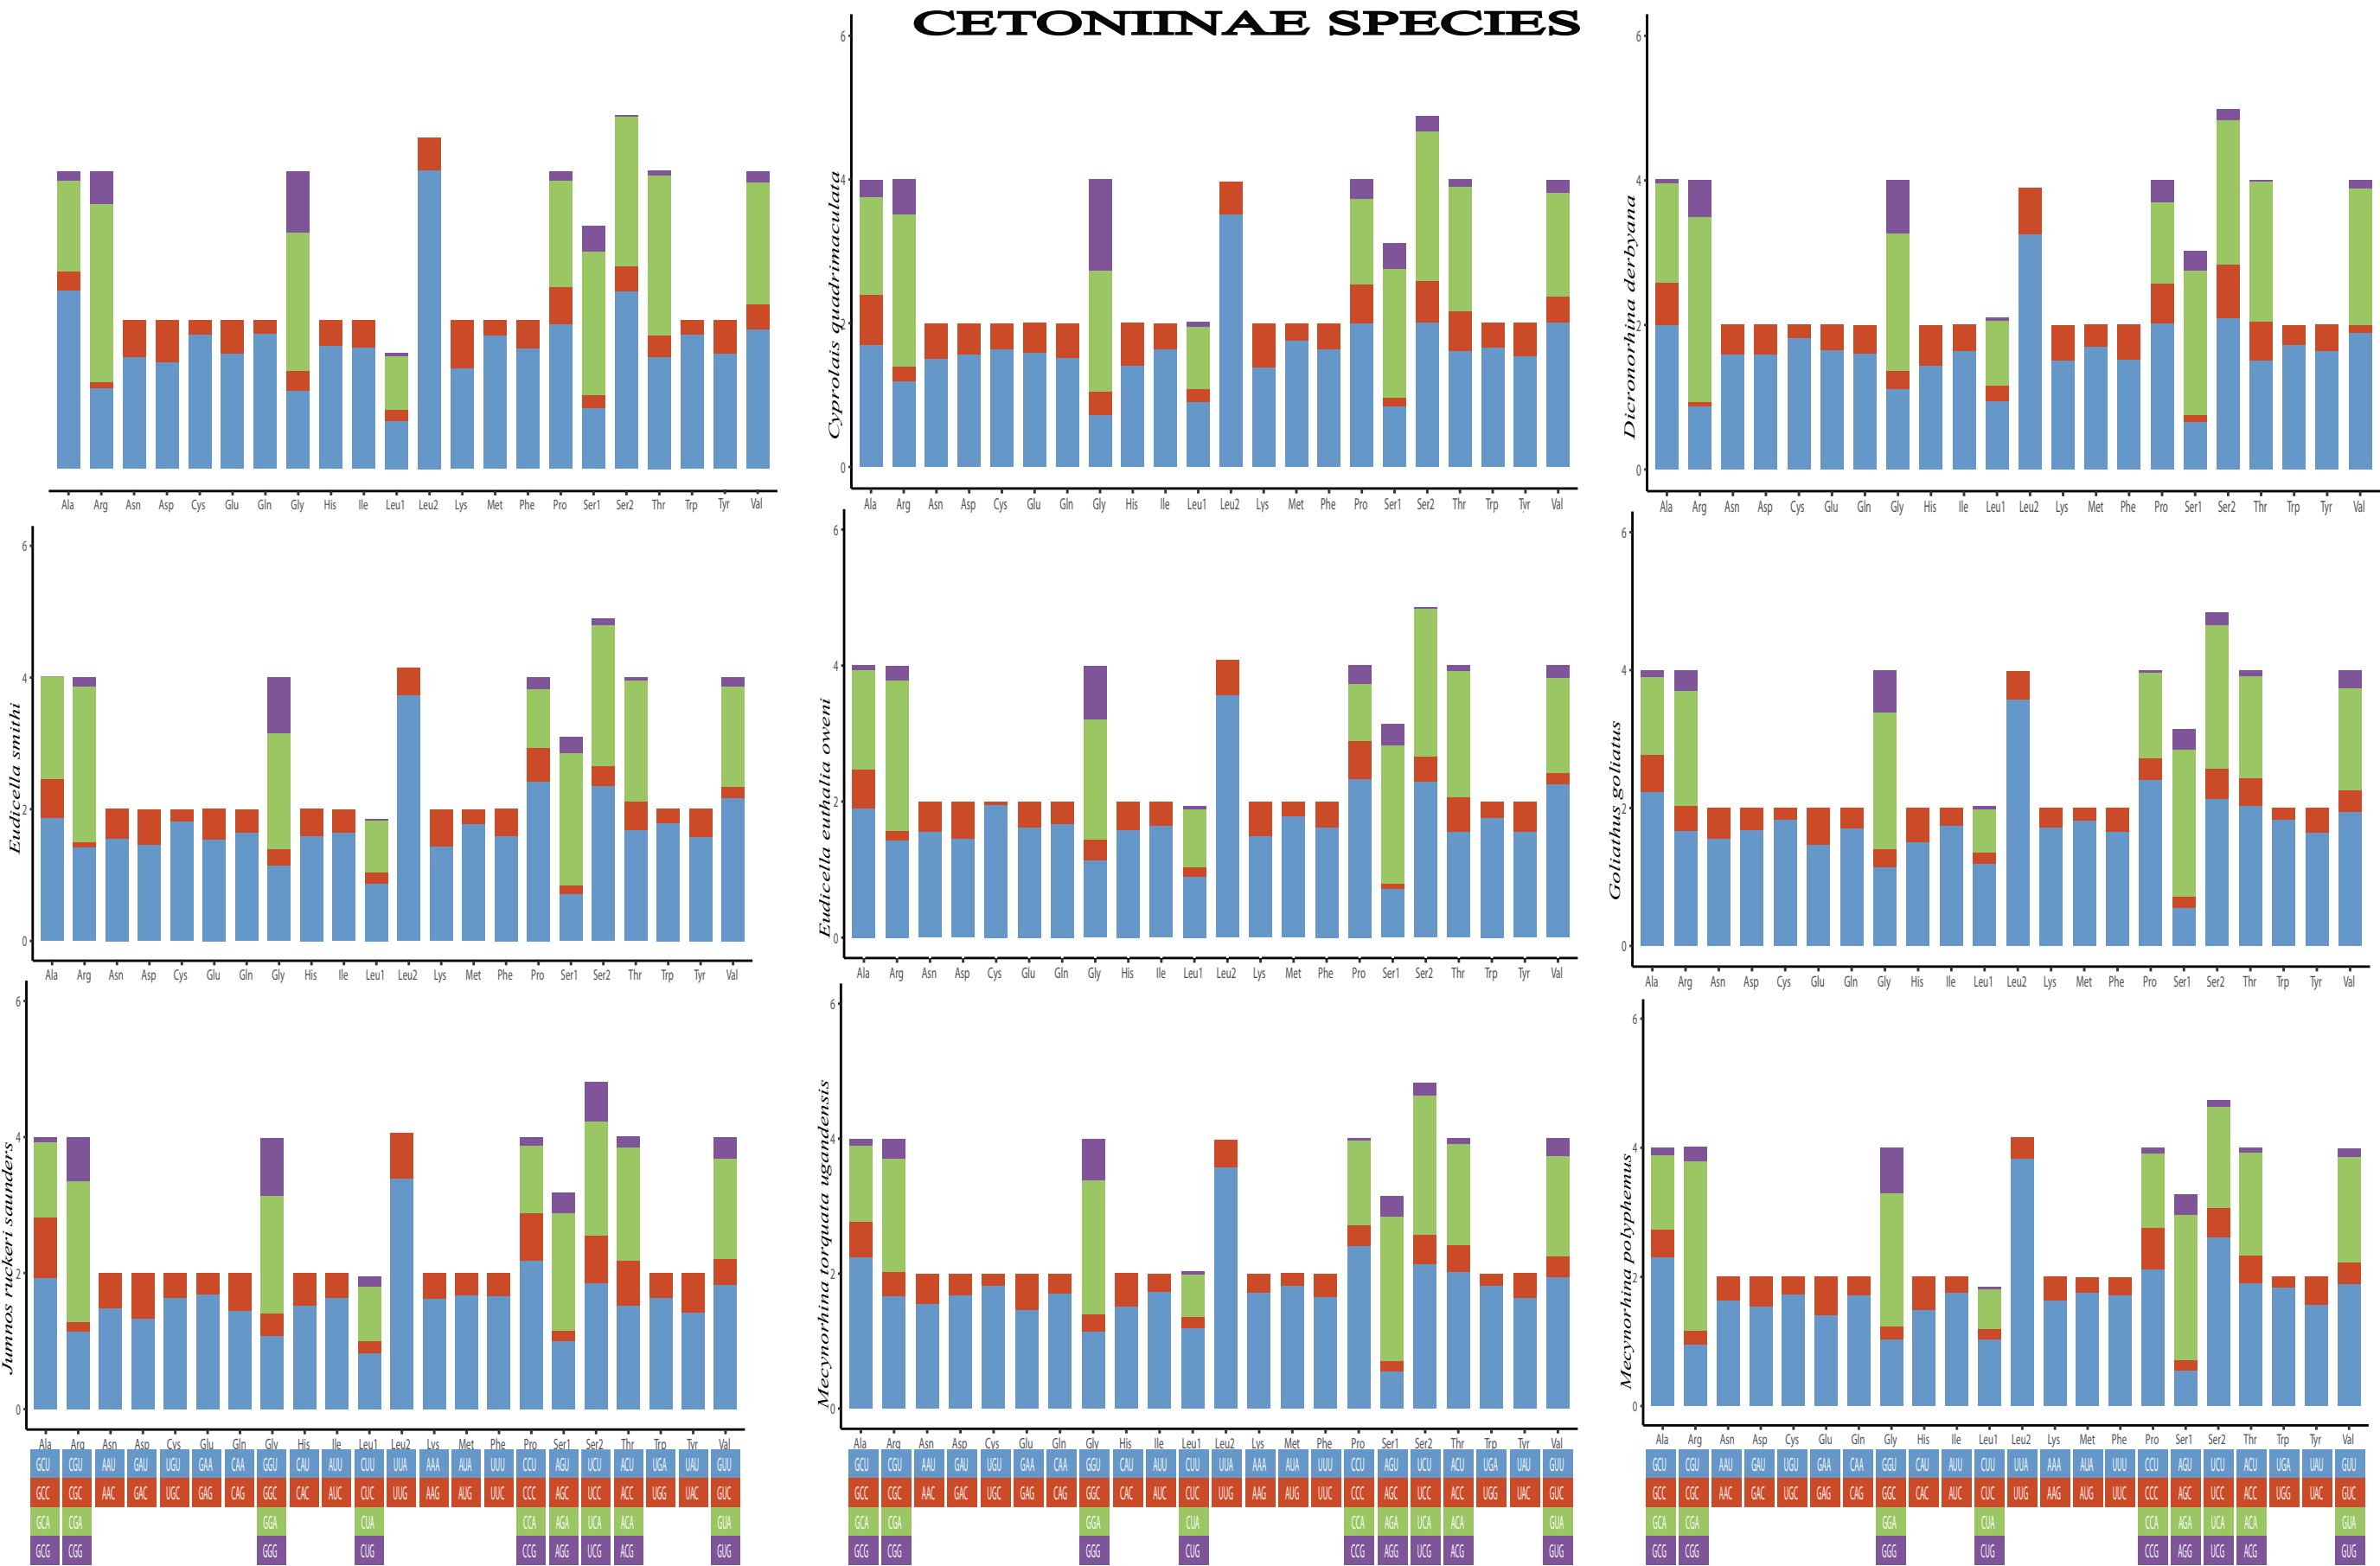

Figure S3. The relative synonymous codon usage (RSCU) in each Cetoniinae and Dynastinae species mitogenomes. Codon families are provided on the x-axis and the different combinations of synonymous codons that code for each amino acid is defined on the y-axis
