# Supplementary material for: The Mitochondrial Genomes of 18 New Pleurosticti (Coleoptera: Scarabaeidae) Exhibit a Novel trnQ-NCR-trnI-trnM Gene Rearrangement and Clarify Phylogenetic Relationships of Subfamilies within Scarabaeidae
Source: Insects. 2021 Nov 14;12(11):1025. doi: 10.3390/insects12111025 (PMC8622766; doi:10.3390/insects12111025)
Supplement: Supplementary file 1 [file insects-12-01025-s001.zip › Table S2.xls]

## Sheet: Chalcosoma caucasus caucasus
Gene	Position		Size	Intergenic nucleotides	Codon
	From	To			Start	Stop	Strand	Sequence
trnQ	1	68	68				L	TATAATTTAGTATAAAATGTACATAGATTTTTGAAATCTAAAGTAGTAGTTAGGGCTATTAATTATAA
trnI	140	204	65	71			H	AATGAAGTGTCTGAATAAAGAGTTATTTTGATAGGATAAAAAATGTGATCATACCACCTTCATTA
trnM	206	274	69	1			H	AAAAAGATAAGCTAATCAAGCTACTGGGTTCATACCCCATCAATAAAGGTCACAATCCTTTTCTTTTTA
nad2	275	1282	1008		ATT	TAA	H	ATTTATTATAAAATTCTATTTTATACAACTTTAATAACAGGAACTCTTATTGCAATTTCATCTTATTCTTGAATAGGAATATGAATTGGATTAGAAATCAATCTACTTTCAATAATTCCATTAATCAGAAAAATTAATAATATAATAACAACTGAAGCTGCACTAAAATATTTTATTACACAAACTTTAGCTTCATCTATTTTACTTTTATCTATTATTTTAATATCCATAAATAATATATATAACATAACTTCAACTATTTACTTTACTCTAATTTTTAATTCAGCTTTATTAACAAAAATAGGAGCTGCCCCATTCCACTTTTGATTCCCAGAAGTGATAGAAGGATTAACATGAACGAATTCATTAATCATACTAACATGACAAAAATTAGCCCCT…
trnW	1281	1346	66	-2			H	AAGGATTTAAGTTAACCAAACTAGGAACCTTCAAAGTTCCCAATAAAGTAAGATCTTTAAGCCTTA
trnC	1339	1401	63	-8			L	AGTCTTATAGTCTAATAAGGACAATAAAGTGCAAATTTATTGGTGGGGGGATCCCTAAGGCTT
trnY	1402	1465	64				L	GATAAAGTGGCCGAGGTATAGGCGGTAAACTGTAAATTTACAAACGAATTTTATTCCTTTATCA
cox1	1467	2997	1531	1	ATT	T	H	ATTAAATGATTATTTTCTACAAACCATAAAGACATTGGAACATTATATTTCTTATTTGGAAGATGATCAGGAATAGTAGGAACATCCTTAAGTCTCCTAATTCGTGCAGAATTGGGAAACCCCGGCTCTTTAATTGGTGATGATCAAATCTATAATGTAATTGTAACTGCTCATGCCTTTATTATAATTTTTTTTATAGTAATACCTATTATGATTGGGGGATTTGGAAATTGACTTGTACCTTTAATATTAGGAGCACCAGATATAGCATTTCCACGAATAAATAATATAAGTTTCTGGCTTCTCCCACCTTCATTAACCCTACTTTTAGCTAGAAGAATAGTAGAAAATGGTGCTGGAACTGGCTGAACTGTATACCCTCCTCTTTCAGCTAACATT…
trnL	2998	3063	66				H	TCTAATATGGCAGATTAGTGCAATGGTCTTAAAATCCATATATAAAGGTTACTCCTTTTTTTAGAA
cox2	3064	3751	688		ATT	T	H	ATTGCAACATGAAATATACTATTATTACAAGATAGTGCTTCCCCATTAATAGAACAATTAACTTTCTTTCATAATCATGCTTTAATGATTCTTTTAATAATTACTGTTTTAGTAGGCTATATAATAAGAACCTTATTTTTTAATAAATATAATAATCGATTCTTATTAGAAGGACAAACTATTGAAATTATCTGAACAACATTACCTGCAATTACATTAATTTTTATTGCCCTTCCTTCCTTACGATTATTATATCTTCTTGATGAAGTAAATAACCCATTAGTATCAATCAAAGCAATTGGACATCAATGATATTGATCTTATGAATATGGGGATTTTAAAAATTTTGAATTTGACTCATATATAATTCCTTCAACTACTATACCAATTGAAAATTTT…
trnK	3752	3821	70				H	CATTAGATGACTGAAAGTAAGTAATGGTCTCTTAAACCAATAAATAGTAGATTAACAACTACTTCTAATG
trnD	3822	3884	63				H	AAAAATTTAGTTAATATATAACATTAACTTGTCAAGTTAAAATAATCTTATAGATAATTTTTA
atp8	3885	4040	156		ATC	TAA	H	ATCCCACAAATATCCCCATTAAGATGACTTTGTTTATTTATTTTATTTATTATTGCTTTTTTACTCTTTAATGTTATAAATTATTTTTCTTTTCTTTACCCAGTTAAATACAAATCTATTAAAAAAATAACTCGAAAAATTAACTGAAAATGATAA
atp6	4034	4705	672	-7	ATG	TAA	H	ATGATAACAAATCTATTTTCATCATTTGACCCAACAACTTCTTTCAATTTATCTTTAAATTGACTAAGAGTCTTCTTAGGAATTTTAATAATTCCTTCAGCTTATTGACTAATTCCCTCTCGATATAATTTTTTATGAATTAAAATTATTATAACATTACACTATGAATTTAAAACTTTAATTGGACCTAAAATTAAAGGAAGAACGTTAATATTTGTTTCCTTATTTTCAATAATTTTATTTAATAATTTTTTAGGGTTATTCCCTTACATCTTCACAGGAACAAGTCATATAGTATTAACACTAACATTAGCTTTACCCCTATGACTTAGATTTATGATTTATGGTTGAGTAAATCATACCATTCATATACTTGCTCACCTAGTACCTCAAGGAACC…
cox3	4705	5491	787	-1	ATG	T	H	ATGTCAAGACACAAAAATCATCCATACCACTTAGTAGACCCAAGACCATGACCTATTCTAGGAGCTTTGGGGGCAATAATCACATTAGTAGGAATTATTAAATGATTCCATTTTTATGATAATTCCTTATTTCTCTTAGGTAGATTAATCACTATATTAGTTATATTTCAATGATGACGAGATATTATTCGTGAAGGAACCTTCCAAGGATTACATACATATCCTGTAACCATAGGACTACGGTGAGGAATAATTTTATTTATTACTTCTGAAGTATTTTTTTTCATCTCATTTTTCTGAGCATTCTTCCATAGTAGTTTATCTCCAACTATTGAATTAGGAATAAACTGACCTCCTAAAGGAATCACACCATTTAATCCCCTTCAAATTCCCTTATTA…
trnG	5492	5555	64				H	ACTTATATAGTATAATAATTATATTTGACTTCCAATCAAAAGATCTAATTTCCTAGTATAAGTA
nad3	5556	5909	354		ATC	TAG	H	ATCTTAATAATTTTTTATACCAGAATCATAATCTTCTTAATTACTTTTATTATAATTATTATTTCATTAATCATCTCTAAAAAAAGATTCATAGACCGAGAAAAAGCTTCCCCATTCGAATGTGGATTTGACCCTAAAAGATCTTCTCGACTTCCATTCTCTATTCAATTTTTCTTAATTGCTATTATCTTCTTAATTTTTGATGTAGAAATTGCTCTTTTAATCCCAATTATCTTAATTATACAAATAACTAATATATTAACATATTTCATCATTACCTTATTTTTTTTAGTTATTCTTCTACTTGGGCTCTACCATGAATGAAACCAAGGTGCCTTAAATTGAGCCATTTAG
trnA	5908	5973	66	-2			H	AGGGTAATAGTTAATTATAACATTTAATTTGCATTTAAAAAGTATTGATTTAATCAATTTACCTTA
trnR	5974	6039	66				H	AAATAAGAAACAAAAATTTGTGTTTAGTTTCGACCTAAAAGTTAGGTGTTTATTCACCCTTATTTA
trnN	6040	6105	66				H	TTAATTGAAACCAAAATAGAGGTAAATCACTGTTAATGATATAACTGAGTCAAAACTCCAATTAAG
trnS	6106	6172	67				H	GAAATATGAAATTCAAGAATAAGCTTCTAACTTAATTCTTTAGCAGTGTAATTCTGTTAATATTTCT
trnE	6173	6236	64				H	GTTTATATAGTTTAATTAAAACATTATATTTTCAATATAAAATTAGAACTTTTTCTTATAAATA
trnF	6235	6300	66	-2			L	ATTTAAATAGCTTATATTTAGAGCAGGATATTGAAGATATTCAGGAAGTAAGGTTACTTTTAAATA
nad5	6301	8014	1714		ATT	T	L	ATTTGTTTAATTTATTTTGTGTTATTTTTGTTTTTAAGTGTTTTATTTTTTATATTAAGATTGAATTTTATAGTGACAGAATATATAGTGTTATTAGAATATGAGCTATTGAGAATTAATTCCTGTAGAATTATAATAACTATTTTATTAGATTGAATATCTTTATTATTTATAAGATTTGTTTTATTTATTTCTTCTATAGTTATTTATTATAGAGAAGAGTATATAGAAGGAGATGTTTATATTAATCGGTTTATTATATTAGTTTCAATATTTGTATTGTCTATAATATTATTAATTATCAGTCCAAATTTAATTAGAATTTTATTAGGTTGAGATGGGTTAGGTTTAGTTTCTTATTGTTTAGTAATTTATTATCAAAATGTAAAATCTTATAAT…
trnH	8015	8078	64				L	ATTTAAATAGTTTAATAAAAATATTGATTTGTGGTATCAAAGATGTAGTTATTTACTTTAAATT
nad4	8078	9415	1338	-1	ATG	TAA	L	ATGATAAGATTTTTATTAACTTTAATTTTTATAGTTCCTTTAAGATTTTTAAAAAAAGAATTTTGATTAAATCAATATTTATATTTTATTATTACTTTCTTATATTGTTTTATATTTAGATTTAACTTTCAAATTTTTCATATTTCTTATTTTATAGGATGTGATTTATTATCATTTATGATAGTTATATTAAGGTTTTGAATTTGTTCTTTAATAATTTTAGCATCTCAAAAAATTTTTCAAAGTAACTATTATTATAATTTATTTTTGTTAGTTATGATTATTTTACTGTTATCTTTATATTTAACTTTTAGTTCTATAAATATATTTATTTTTTATTTGTTCTTTGAGGTTAGTCTTATTCCGACCTTATTTTTAATTGTAGGTTGAGGGTATCAA…
nad4L	9409	9699	291	-7	ATG	TAA	L	ATGGTAATTTTTTGTTTATTTTTTTCTTTAGTTATATATTTTATAGGATTAATTTCATTTTGTATAAAACGAAAGCATTTATTATTAATATTATTAAGATTAGAATTTGTTATGTTATCTTTATATTTAAATTTATTTTTATATTTAATATTTTTCAATTATGAATTTTATTTTGGTATAGTATTTTTAACAATGAGAGTTTGTGAAGGAGCTTTAGGGTTAGCTATTTTGGTTTCAATGGTTCGAACTCATTCTAATGATTATTTTCAGACATTTAATGTTTTATGATAA
trnT	9702	9766	65	2			H	GTTTTAATAATTTATTTAAAATATTGGTCTTGTAAACCAAAAATAAGATTGAGTCTTTTAAAACA
trnP	9767	9832	66				L	CAGAGAATAGTTTAATAAAAATATTAATTTTGGAGATTAATGATAGAGGTAGAACTCTTTCTCTGA
nad6	9834	10337	504	1	ATT	TAA	H	ATTATCCTATTATTAATAACATTATCATTAATTAGATCCTTAATATTAATTTGCTTAACCCATCCTATTTCTGTAGGCAGAATTCTTTTTATACAAACAATCATTATTACCTTAACTATTGGATTTTTCCATAGTAATTTCTGATATTCATACATTATATTCTTAATCATAATTAGAGGCATATTAGTTTTATTTGCTTACATAACTAGAGTAGCATCAAATGAAAAATTCTCCCCATCAATTAAAATTTTCATAATAGTCTTTATTATTACAATTATATTTATTATTACTCTAATAATAATAGACCCCTACTATACTAATTTAAATAATGTATTTTCAGATACTTTAACTAATTCAACTCTTTATAATATATCTATAACTAAATACTTCAATTACCCT…
cyt b	10337	11479	1143	-1	ATG	TAG	H	ATGAAAACACCATTCCGAAAAATATCTCCTATATTAAAAATTATTAATAATTCATTAATTGATCTTCCAACTCCATCAAATATTTCAACATGATGAAATTTTGGATCCTTACTAGGACTTTGCTTAATAATTCAAATCATTACAGGAATTTTTTTAGCTATACATTATACAGCCCATATCGATTATGCTTTTAATAGAGTAATTCATATTTGTCGAGATGTAAACTATGGATGGCTATTACGAGTTATTCATGCTAATGGGGCTTCATTTTTTTTTGTTTGTATTTATATACATATCGGACGAGGAATATACTACAGAAGATACAATCTTCATATAACTTGATCAGTAGGAATTATTATTTTATTTATAGTAATAGCAACAGCATTCTTAGGATATGTT…
S_copy2	11478	11542	65	-2			H	AGTTAATGAACTTGTATAAGTGTATATTTTGAAAATATAAAAAAGAGTTGAATCTCTATTAACTT
nad1	11562	12512	951	19	ATT	TAA	L	ATTATTATAAAAGATATTATTTTAATATTAATTATTAGTTTAATTTTATTAATTTGTGTATTAGTCGGGGTAGCTTTTTTAACTTTAATAGAACGAAAGGTATTAGGTTATATTCAAATTCGTAAAGGTCCTAATAAGGTTGGATTTTTAGGAATTTTACAACCTTTTAGTGATGCCATTAAGTTATTTTCTAAGGAACAGACATATCCATTAATGTCTAATTTTTATATGTATTATATATCTCCAGTATTTAATTTATTTTTATCATTATTATTATGAATGTGTATACCTTTTTTTACTTTTCTATTCAATTTCAATTTAGGGGTTCTATATTTTTTATGTTGTTCAAGATTAAGAGTATATACTATTATAATTGCTGGGTGGTCTTCTAATTCTAAT…
L_copy2	12514	12576	63	1			L	ATTACTTTGGCAGATTAGTGCTTTAGATTTAGAATTTAAATATGTATGTTAATACAAGTAATA
rrnL	12577	13860	1284				L	AATGAAAGATTTATTTATTAGTTTTAAAAAAAATAGTTTTGATAATAGTATATTTTAGAAATTAATAATAGAATTATAGTGAATAGTATAGTGATAGAAATATGAATTAATAAGGTTTAATTGTTTAGAAGAAAAATTAATTTTTTGTACCTTGTGTATCAGGGTTTATTAAAATAAGTTATTAATATAATTTTCTCGAATTAAAAAGAGCTATAATTATAGAAATTTAATTGTTGCATAACTTTTTATAATATAATTATAGAAATGAAACGTTAGTCGTTTTTTAAGATATCTAGTTTCTTAAGAAATAAATTTAATTTAGTTTTTTTAATTTTATATATAATTAATTTTATAGTTATATATTTAAAAGATGTAATATTTTAAGGGATGAGCTTTAAA…
trnV	13861	13930	70				L	CAAATTAGAGCTTGAAAGAAAGCATTTTATTTACATTAAGAGGTTAGTTGTGAGAATCAATTTAATTTGA
rrnS	13931	14714	784				L	TTCTGGCTTGAAATTTTAATTTATAGATTTAATTATATACAAAGTTTTTTGTTATTTGAATTTATTATATAATGATAAATTATTTGTGTTTAAGTATAAAGATGTAATATAGAAAATTAAATATAAAAGAAATTTTGATTTAGGAATTTATAATAGTATTGATTAAATTTGTGCCAGCAATTGCGGTTAGACAGATAATGCGATTAAATTTGTTCGGTTAATAATAAATTAGATTATAGGGGTTTTAAAAGTTGATTTTATTAGGTGAAATTAGTAAGGTTGATTAAAAATTATTTTTAGATAATAAGGTTATGAGGTTTTTATTATAGACTAGGATTAGATACCCTATTATTGAAAATGCAAATTCTTATGCTTGAGTAGTAGTAGTTATGTTCTTGA…
Overlap:	10	gap:	7
Table S2. Location of features in the mitochondrial genome of Cetoniinae and Dynastinae species.

## Sheet: Dynastes hercules hercules
Gene	Position		Size	Intergenic nucleotides	Codon
	From	To			Start	Stop	Strand	Sequence
trnQ	1	66	66				L	TACAACTTAGTATAAAATGTACTTAGATTTTTGATATCTAGAGTGATAGAATTCTATTAGTTGTAA
trnI	128	191	64	61			H	AGTGAAGTGTCTGAATAAAGAGTTATTTTGATAGAATAAATCATGTGATCAATCACCTTCATTA
trnM	192	259	68				H	AAAAAGATAAGCTAACTAAGCTACTGGGCTCATACCCCATCAATAAAGGTCCACCCCTTTTCTTTTTA
nad2	260	1267	1008		GTC	TAA	H	GTCTATTATAAAATCCTATTCTACACCTCCCTAATAACCGGAACCTTAATTGCCATCTCTGCTTACTCCGGAATAAGAATATGAATCGGTCTAGAAATTAACCTCCTTTCTATTATCCCCCTGATAAGAAGAACAAATAATATAATAGCTTCAGAAGCATCCCTGAAATATCTTGTTACACAAGCTTTAGCCTCCTCCCTCCTCCTATTTTCTATTATCTTCATATCTATAAATAATATATTTAACATAAACTTCTGCCCTTACCTTAGACTAGTTTTTAACACAGCCCTATTTACCAAAATAGGCGCCGCCCCCTTCCATTTTTGATTTCCTGAAGTAATTGAAGGCCTATCATGAATCAACACAATAATTATACTAACCTGACAAAAACTAGCCCCG…
trnW	1267	1332	66	-1			H	AAGGATTTAAGTTAAAAAAACTAAGAACCTTCAAAGTTCTAAATAAAGTAAGTACTTTAAGCCTTA
trnC	1325	1388	64	-8			L	GGCCTTGTAGTCTAAATAGGATGTCAAGTTGCAAACTTGAAGGTGGGGGGGGCCCCTAAGGCTT
trnY	1389	1453	65				L	GATAAAGTGGCCGAGGTTAGGTGGTAAACTGTAAATTTACATACGAATTTTAAATTCCTTTGTCA
cox1	1455	2985	1531	1	ATC	T	H	ATCAAATGACTTTTTTCAACAAACCATAAGGATATTGGAACTCTGTATTTTCTGTTTGGGAGATGATCAGGAATAGTCGGAACATCACTAAGGCTTCTAATTCGAGCCGAACTAGGAAACCCTGGGTCATTAATTGGTGATGACCAGATTTATAATGTTATTGTAACAGCTCATGCTTTTATTATAATTTTTTTTATAGTTATACCCATCATAATTGGGGGGTTCGGAAATTGACTAGTACCCCTAATACTAGGGGCCCCAGACATAGCCTTCCCACGAATAAATAACATGAGATTTTGACTCCTCCCCCCCTCATTAACCCTTCTTCTAACTAGAAGAATAGTAGAAAACGGGGCCGGAACTGGGTGAACAGTATACCCACCCCTCTCTGGAAATATT…
trnL	2986	3050	65				H	TCTAATATGGCAGAATAGTGCAATGGACTTAAACCCCATTTATAAAGGACACCCTTTTTTTAGAA
cox2	3051	3738	688		ATC	T	H	ATCGCTACATGAAAAATACTATCACTTCAAGATGGAGCGTCCCCTTTGATGGAACAACTTACCTTCTTCCACAATCATGCAATAATAATTCTTTTCATAATTACTGTCCTAGTTGGATATATAATAAGAACTCTATTCTTTAACAAATTTAATAACCGATACCTTCTTGAAGGTCAAACAATTGAAATTATCTGAACAACACTCCCTGCTATTACCCTAGTCTTCATTGCCCTTCCATCCTTACGTCTTCTTTATCTTCTTGACGAAATCAATAACCCCTTAGTATCAATCAAAGCAATTGGTCACCAATGGTACTGATCATACGAATATGGAGACTTTAAAAACTTTGAATTTGACTCCTACATGCTATCTCAGGACTCTATAAAACTAGATAGATTT…
trnK	3739	3809	71				H	CATTAGATGACTGAAAGTAAGTAATGGTCTCTTAAACCAATCAATAGTAATCTAACGTTTACTTCTAATGA
trnD	3830	3892	63	20			H	AAGAATTTAGTTAATAAATAACATTAACTTGTCAAGTTAAAATAATCTTCAAGATAATTCTTG
atp8	3893	4048	156		ATT	TAA	H	ATTCCTCAAATAGCTCCTCTTAACTGATTAGCTTTATTTTTTTTATTCATTACCGTATTTCTAATCTTTAATGTAATCAACTACTTCACTTTTCTTTACCCACCAAAAAAGCCTTCCTTACAAAAAACTACTAAAAAAATTAGTTGAAAATGATAA
atp6	4042	4713	672	-7	ATG	TAA	H	ATGATAACTAACCTATTTTCTTCATTCGACCCCTCTTCGTGCTTCAGGCTATCTTTAAATTGACTAAGAACCTTTCTTGGGATTATGTTAATTCCATCTACCTTCTGATTAATTCCCTCACGATACAGTATATTATGAAATAACATTACCATAATACTTCATAATGAATTTAAAACCCTGATTGGGCCCAGAGTTAAAGGAAGAACCTTAATCTTTGTCTCCCTATTTTCTATAATTCTATTCAACAACTTTCTAGGGCTATTTCCATACATTTTTACCAGAACTAGCCATATAGTATTAACTCTGACTCTAGCTCTCCCTCTATGATTCAGATTCATAATTTATGGGTGAACTAATCACACTATTCACATGTTTGCCCATCTTGTTCCTCAGGGGACA…
cox3	4713	5499	787	-1	ATG	T	H	ATGTCAACACACAAGAACCATCCTTATCACTTAGTCGACCCAAGACCATGACCAATCCTAGGAGCCTTTAGAGCCATAGTAGTCCTTGTAGGACTAATTAAATGATTTCACTTCTATGATAATTCCCTGTTTCTATTCGGAACATTCATTACCATTCTAATTATATATCAGTGATGACGAGACATTGTTCGGGAAAGAACATTCCTAGGGTTACACACTTACCCGGTAACAATAGGCCTACGGTGGGGAATAATCCTCTTTATTACCTCAGAAGTATTCTTCTTTATTTCATTCTTCTGGGCCTTTTTCCATAGAAGACTATCTCCCTCAATTGAATTGGGAATAAACTGACCCCCAAAAGGAATCACTCCATTTAACCCCCTCCAAATCCCTTTATTA…
trnG	5500	5563	64				H	ATTTATATAGTATATTAATTATATTTGACTTCCAATCAAAAGATCTAGGAAACTAGTATAAATA
nad3	5564	5917	354		ATC	TAG	H	ATCCAAATAATCTTCTTAACTGGAATCACTATTATCTCTATTACATCATTAATAATAATAATTTCATATATCATTTCAAAAAAAAGCTTTATAGACCGGGAAAAAGCATCCCCCTTTGAATGTGGATTCGACCCAAAAAGATCCTCACGTATACCCTTCTCAATTAATTTCTTCTTAATTGCAGTAATCTTCCTAATTTTTGATGTTGAAATCGCCCTTCTCATCCCAATTATTCTTATTATAAAAATAACAAACTTACTAACCTATACCATAGTCTCACTATTATTTCTAATTATTCTATTAATTGGACTTTACCATGAATGGCACCAAGGGGCTTTAAACTGAGCCATTTAG
trnA	5916	5980	65	-2			H	AGGGTTATAGTTAAACATAACATTTAATTTGCACTTAAAAAGTATTGATCAATCAATTTACCTTA
trnR	5981	6045	65				H	AAATAAGAAACAAAGCATTGTATTTAGTTTCGACCTAAACCTCTGGTGAAATCCACCCTTATTTA
trnN	6048	6112	65	2			H	TTAATTGAAACCAAAAAGAGGTCCACCACTGTTAATGGTGTAAATGAGAAAATTCTCCAATTAAG
trnS	6113	6179	67				H	GAAATAAGATAGCCAAGAATAAGCTTCTAACTTAATTCTTTAGCAGCGCAACTCTGTTAGTATTTCT
trnE	6180	6242	63				H	ATTTGTATAGTTTAATAAAAACATTACATTTTCAATGTAAAATTAGAACCTATCTTACAAATA
trnF	6241	6304	64	-2			L	ATTTAAATAGCTTATAAAGAGCGAGATATTGAAGATATCTAGGAAGTAGTAATACTTTTAAATA
nad5	6305	8018	1714		ATT	T	L	ATTTGTTTAGTTTATTTTGTTGTCTTTTTATTTTTTAGGATTGTGTCTTTTCTAGGTAGATTGGTTTTAATAGTTAGAGAGTATAGGGTTTTGTTAGAGTATGAGGTGTTGAACATTAATTCATGTGGTATTATAATGACGGTTCTGTTAGATTGAATGTCTTTATTGTTCATGAGGTTTGTATTATTTATTTCGTCTATAGTGGTTTTCTATAGGGAGGAGTATATAGAGGGAGACATTTTTATTAATCGTTTTATTATGCTGGTTTCTTTATTTGTTCTTTCTATAATGTTATTAATCATTAGCCCAAATTTGATTAGAATTTTATTAGGTTGGGATGGGCTGGGCTTAGTGTCTTATGCTTTAGTTATTTATTATCAGAATGTGAAGTCCTATAAT…
trnH	8019	8081	63				L	ATTTAAATAGTTTAATTAAAATGCTGGTTTGTGGTGCTAGAGATGTAGTTTTTACTTTAAATT
nad4	8081	9418	1338	-1	ATG	TAA	L	ATGATAAAGTTTCTTTTAGCTTTAGCTTGTTTAGTTCCTATAAGATTCATAAAGAATAGGTTTTGATTGAGTCAGTATATATATTTTGTCCTTACGTTTTTGTATTGCTTTATATTTAGGTCAAATTATCAGTTTAGGTATATTTCTTATTTTTTGGGGTGTGATCTGCTTTCTTTTATAATGGTTTTACTTAGGTTATGAATTTGTTCTTTAATAATTTTGGCCTCCCAAAAGATCTATGTTTTGGGGTATTATTATAATATATTTTTATTTGTGATAATTGTTTTACTGTTATCTTTATATTTAACTTTTAGATCAATAAATATGTTTGTATTTTATTTATTTTTTGAAGTCAGGTTAATTCCGACACTAATTTTAATTGTGGGCTGAGGGTACCAG…
nad4L	9412	9702	291	-7	ATG	TAA	L	ATGGTAGTGTTTTGTTTATTGTTTTCGGTTTTTATGTATTTTGCTGGATTAATTTCATTTTGTATAAAACGTAAGCACTTGTTGTTAATATTATTAAGCCTAGAGTTTGTTGTTTTGTCTTTATATTTTAATTTGTATTTATTTTTAATACTGTTAGATTGTGAATTTTATTTTAGAATGATTTTTATTAGAATGAGAGTATGTGAGGGGGCATTGGGATTGGCTGTTCTGGTCTCTATAGTTCGGACCCACAGAAATGACTATTTTCAATCTTTTAATGTGTTATGATAA
trnT	9705	9769	65	2			H	GTTTTAATAATTTAATTCAAAATACTGGTCTTGTAAACCAGAAATAAGATATTTCTTTTAAAACT
trnP	9770	9835	66				L	CAGAGAATAGTTTAATTAAAATATTAATTTTGGAGATTAATGTTAGAGGTAATTCTCTTTCTCTGA
nad6	9837	10340	504	1	ATC	TAA	H	ATCATCCTATTTCTTATAATAATAACATTCATTTGTTCAACAACCTTAGTATGCTTGACACATCCCATCTCAATAGGATCCATCCTCCTGCTTCAAACCATTTCTATTACCTTAACAATTGGCTTCTTCCACACAAACTTTTGATACTCATATGTTCTCTTCCTTATTATAGTAAGAGGAATACTTGTCCTATTTGCATATATAACAAGAGTAGCATCAAACGAAAAATTTTTCCCATCAATCAAAATCTTCACAATAATCATATTTATCATCCTCCTATTTATAATCCTATTTCTTTCAATAGATCCGTACTTCTCAAACTTAAACAATGTCTTCACAGACAGAATTAACCAAACACCTATATACACAACCTCTATAAGAAAATATTTTAATTACCCC…
cyt b	10340	11482	1143	-1	ATG	TAG	H	ATGAAAACACCAATACGAAAATTATCCCCTCTACTTAAAATTATTAACAATTCCCTGATTGACCTTCCTACACCTTCAAATATTTCCGCCTGATGAAATTTTGGATCCCTTCTTGGACTATGCTTAATAATTCAGCTTATTACTGGGATCTTCCTAGCCATGCACTATACAGCACATGTTGATCATGCATTTAATAGTGTAATCCACATTTGTCGTGACGTAAATTATGGATGACTATTACGAACACTTCACGCCAATGGAGCCTCCTTCTTCTTCGTTTGTATCTATCTTCATATTGGACGAGGAATATACTACAGAAGATACACACTCCACCTAACGTGGTCAGTAGGAGTTATTATTTTATTTATAACTATAGCAACTGCCTTCTTAGGTTATGTC…
S_copy2	11481	11545	65	-2			H	AGTTAATGAACTTGTATAAGTGTATATTTTGAAAATATAAAAAAGAGTAAACCCTCTATTAACTT
nad1	11564	12514	951	18	ATT	TAA	L	ATTTATTTAAATGACTTTTGGTTGTTATTTTTTTGTAGTTTGATTTTGGTTGTGTGTATTTTAGTTGGGGTAGCTTTTTTAACTTTAATGGAACGTAAGGTTCTGGGTTATATTCAAATTCGGAAGGGCCCTAATAAGGTTGGATTTATGGGAATCATACAGCCTTTTAGAGATGCAATTAAATTATTTACGAAGGAGCAGACATACCCTATTATATCAAATTTTCTCATGTATTATATAGCTCCTGTGTTTAGTTTATTTTTGTCCTTGTTGTTATGAATATGTATACCTTTCTTGACTGTTTTTTTTAATTTTAATCTGGGTGTTTTATATTTTTTGTGCTGTTCAAGGTTAGGGGTCTATACAATTATAATTGCAGGGTGAGCGTCTAATTCTAAT…
L_copy2	12516	12580	65	1			L	ATTACTTTGGCAGATTAGTGCTTTAAATTTAGAATTTAAATATGTATATGTATATACAAGTAATA
rrnL	12581	13856	1276				L	GATGAGAGGCTTATTTCTTGGTGTTAAAAGAAGAATCTTTAGTGGTAGTAAGTTTTAGAAGTCAGAAGTTTTATTATAGTGAAGAGTATAGTGATAGAATCTTGGGATAGAGTTAAATTTTAAAAAAGAAGAGTTAATTTCTTGTACCTTGTGTATCAGGGTTTATCAAAATAAGCTGAACAGCTCAGTTTTCTCGAATTAAGAAGAGCTATGGCCTTATAAATTTAATTGTGGCATAAATTTTTCACATAAGGCTATGGTAATGATATGTTAATCGTTTTTTATGATATCTAGTTTCTTAAGAAATAAATTTAATTTAGTTTTTTAAATGTACAGTGCTTATTTGTTAACTTTGTATTTTAAGAATTTAATGTTTCTAGGGATGAGCTTAGAAACAGA…
trnV	13857	13926	70				L	CAAATTAGAGCTTGATAGAAAGCATTTTATTTACATTAAAAGGTTAGTTGTGTGAATCAATTTAATTTGA
rrnS	13927	14711	785				L	TTTTATTCTGGCTTTAGATTTTAATGTATAGACAAAATTATATACAAATTTTAGTGGTAAGTGAAAATGTTGTATAACGACATTAGGAGCTTTTATTATCAAGATGTAATATAGAGAATTAAATATGAAAGTGATTTTGATTTAGGGATTTATAATAATGCTGATTAAATTTGTGCCAGCAATTGCGGTTATACATATAGCGTAATTAAATTTGTTCGGTTTGTAATTGTTTAGATTCTGTTTGATTTAGATTTAGCCTTATTAGGTGAAATTAGTAAGGTTAATAAAAATTTTGTTTGAGGTAATGAGGTTATGAGGTTTTTAAAATAGACTAGGATTAGATACCCTATTATTGAAAATGCAAATAAGTATGCCTGAGTATTAGTAGCTATGTTCTTG…
Overlap:	10	gap:	8

## Sheet: Oryctes nasicornis
Gene	Position		Size	Intergenic nucleotides	Codon
	From	To			Start	Stop	Strand	Sequence
trnQ	1	69	69				L	TATAATTTAGTATAGTATGTACATGGATTTTTGAGGTCTAAGGGGATAGTTTAAATCTATTAATTATAA
trnI	126	189	64	56			H	AATGAAGTGTCTGAATATAGAGTTATTTTGATAGAATAAAAAATGTGAACTTTCACCTTCATTA
trnM	190	258	69				H	AAAAAGATAAGCTAATTAAGCTACTGGGCTCATACCCCATCAATAAAGGTTCTAACCCTTTTCTTTTTA
nad2	259	1266	1008		ATA	TAA	H	ATATACTATAAAATTCTATTCTACTCAACATTAATAATTGGAAGCCTAATTTCTGTCTCTTCGTACTCCTGAATAGGGATGTGAATTGGTTTAGAAATTAATCTTCTATCTATAATCCCACTAATTAGAAGATCAAATAACATAATAGCATCAGAAGCATCACTTAAATATTTCGTTACCCAAGCGTTAGCCTCATCTGTTCTTCTTCTCTCAATTATTCTGATATCAATTAATGATATACATAATATTAATTCTGTCCACTACTTCAGCTTAATCTTTAACTCAGCCTTACTTACTAAAATAGGAGCTGCCCCATTTCATTTCTGATTTCCTGAAGTAATAGAAGGATTAAATTGACCTAACGCTTTAATTATACTTACATGACAAAAGCTAGCCCCC…
trnW	1266	1331	66	-1			H	AAGGATTTAAGTTAAGAAAACTAAGAACCTTCAAAGTTCTAAATAAAGTTACAACTTTAAGCCTTA
trnC	1324	1385	62	-8			L	GGCCTTATAGTCTATTAGGACAATAAATTGCAAATTTATAGGTGGGTTAATCTCTAAGGCTT
trnY	1386	1450	65				L	GATAAAGTGGCCGAGTTGTAGGCGGTAAACTGTAAATTTACTTACGAATGTTATTTCCTTTATCA
cox1	1452	2982	1531	1	ATC	T	H	ATCAAATGATTATTTTCAACAAATCACAAAGACATTGGAACATTATACTTTTTATTCGGAAGATGATCTGGAATAGTCGGTACATCTCTCAGCTTATTAATCCGAGCCGAACTAGGAACTCCGGGATCTTTAATTGGAGATGATCAAATCTATAATGTTATTGTAACAGCTCACGCTTTTATTATAATTTTCTTTATAGTAATGCCTATTATAATTGGCGGATTCGGAAACTGACTCGTCCCCTTAATACTAGGAGCCCCTGATATAGCATTCCCACGAATAAATAATATAAGATTTTGACTTCTCCCCCCATCCCTTACCCTCCTTCTAGCAAGAAGATTAGTAGAAAACGGGGCTGGGACCGGATGAACAGTCTATCCTCCCCTATCTGCAAATATT…
trnL	2983	3048	66				H	TCTAATATGGCAGAATAGTGCAATGGTCTTAAACTCCGTATATAAAGATTACATCTTTTTTTAGAA
cox2	3049	3736	688		ATA	T	H	ATAGCAACATGAAACATATTGCTCCTGCAAGATAGTGCATCTCCATTAATGGAACAATTGACTTTCTTTCACAATCATGCACTAATAATTCTAGTTATAATTACCACCTTGGTAGGTTATATAATAAGAACTTTATTCTTCAATAACTTCAATAATCGGTTCCTATTAGAAGGACAAAAAATTGAAATTATTTGAACAACGCTTCCAGCAGTCACTCTAATCTTTATTGCTCTCCCATCCCTTCGTCTACTCTATCTATTAGATGAAATCAATAACCCTTTAGTATCAATTAAAGCAATTGGTCACCAATGATACTGATCTTACGAATATGGAGATTTTATAAACTTTGAATTTGACTCATATATAGCCCCCACCTCATCCCTCAACATAGATGGATTT…
trnK	3737	3806	70				H	CATTAGGTGGCTGAAAGTAAGTAATGGTCTCTTAAACCAATTAATAGTAGAATAACGACTACTTCTAATG
trnD	3807	3869	63				H	AAAAATTTAGTTAATATATAACATTAGCTTGTCAAGCTAAAATAATCATTAAGATAATTTTTA
atp8	3870	4025	156		ATT	TAA	H	ATTCCTCAAATAGCACCACTAAACTGACTCTCTCTATTCTTATTATTTATTTCTATCTTCCTTATTTATAATGCCGTAAATTACTTCTCATTTTTATATCCAGTTAAACAACCAGTTAAAAAAAAAACTGTTAAAAAAATCAACTGAAAATGATAA
atp6	4019	4690	672	-7	ATG	TAA	H	ATGATAACTAATTTATTTTCATCATTCGATCCTTCATCAACTCTAAATCTATCCCTTAATTGATTAAGAACTTTCCTAGGAATCATATTAATCCCTACCTCATTTTGATTAATTCCATCCCGTTATAACTTCTTATGAATCAAAATTATTATAACCCTACATAATGAATTCAAACTACTAATTGGACCTTCAGTCAAAGGAAGAACTTTAATTTTTATTTCACTCTTCTCAATGATTCTATTTAATAATTTTCTTGGGTTATTCCCGTATATCTTTACAAGAACAAGTCACATAGTCCTAACTCTTACGCTAGCACTACCATTATGATTAAGATTTATAATTTATGGATGAACTAATCACACAACTCATATACTTGCACATCTAGTTCCTCAAGGAACA…
cox3	4690	5476	787	-1	ATG	T	H	ATGTCAACACACAAAAATCACCCGTATCACTTAGTAGATCCTAGCCCATGACCAATCCTCGGAGCATTTAGAGCTATAATTACTCTTGTTGGAATTATCAAATGATTTCACTTCTATGACAACTCATTATTTCTATTAGGAACATTTATTACAATATTAGTAATATTCCAATGGTGACGAGATGTAATTCGAGAAGGAACATTTCAAGGATTGCACACATATCAAGTAACAATAGGCCTACGATGAGGTATAATTCTATTTATTACATCAGAAGTCTTCTTCTTTATTTCATTCTTTTGAGCTTTCTTCCATAGAAGATTAGCACCCACGATTGAATTAGGAATAAATTGACCCCCTAAAGGAATTATCACATTTAACCCTTTACAAATCCCCCTATTA…
trnG	5477	5540	64				H	ATTTATATAGTATATTAATTATATTTGACTTCCAATCAAAAGAACTGATCACTCAGTATAAATA
nad3	5541	5894	354		ATC	TAG	H	ATCATAGTTCTAATAACCATATGCATAATCATCTTATTTATTTCATTCATCATAATCATAATCTCATTCGTCATCTCAAAAAAAAGATTCATAGATCGAGAAAAAGCTTCGCCATTCGAATGTGGATTCGACCCTAAAAGATCATCCCGACTCCCATTCTCTATTCAATTTTTTCTAATTGCCGTCATCTTCCTAATCTTCGATGTTGAAATCGCCCTATTAATCCCTATTATCTTAATTATAAAGTCAACAAATATAACAACCTACTTTATTATCTCGCTATTCTTCCTTATTATCCTACTAGCTGGATTGTATCATGAATGAAACCAAGGAGCTTTAAATTGGGCCATTTAG
trnA	5893	5956	64	-2			H	AGGGTAATAGTTAACCATAACATTTAACTTGCACTTAAAAAGTATTGATACATCAATTTACCTT
trnR	5957	6021	65				H	AAGTAAGAAGCAAATATTGCATTTAGTTTCGACCTAAACCTTTGGTGACCAATCACCCTTATTTA
trnN	6022	6085	64				H	TTAATTGAAACCAAAAAGAGGTATATCACTGTTAATGATAAAAATGAGTTTAACTCCAATTAAG
trnS	6086	6152	67				H	GAAATAGGTTAATCAAGAATAAGCTTCTAACTTAATTCTTTAGCAGTGCAACTCTGTTAATATTTCT
trnE	6153	6215	63				H	ATTTATATAGTTTAATAAAAACATTACATTTTCAATGTAAAATTAGAACACCTCTTATAAATA
trnF	6214	6277	64	-2			L	ATTTAAATAGCTTATATAGAGCAAGATATTGAAGATATCTAGGAAGTGTTAACACTTTTAAATA
nad5	6278	7991	1714		ATT	T	L	ATTTGTTTAGTGTACTTTGTTGCTTTTTTGTTTTTTAGAGTTATCTCTTTTTTAATTAGTTTAAATTTTATGGTTAGTGAATATATAGTTTTATTTGAGTATGAGGTTTTAGTTGTTAATTCTTGTAGAATTATGATAACTATTTTGTTGGATTGAATGTCTCTTTTATTTATGAGATTTGTTTTATTTATTTCTTCTATAGTTATTTATTATAGAGAGGAATATATAGAGGGGGATGTTTATATTAATCGTTTTATTATATTAGTTTCAATGTTTGTTTTATCAATAATGTTGTTAATTATTAGTCCTAATATTATTAGAATTTTATTAGGCTGAGACGGGCTAGGACTTGTTTCTTACGCTTTAGTTATTTATTATCAAAATGTAAAATCTTATAAT…
trnH	7992	8055	64				L	ATTTAAATAGTTTAATTAAAATATTGACTTGTGGTGTCGGAGATGTAATTAGTTACTTTAAATT
nad4	8055	9392	1338	-1	ATG	TAA	L	ATGATAAGGTTTTTTTTAGCTTTAATATGTATAGTTCTTTTAAGATTTATGAAGAACATGTTTTGATTAAATCAATACTTATATTTTGTTCTTACTTTCATATATTGTTTTCTTTTTAGTTTTAGTTATCAGTTTAATTATATTTCTTATTTTTTAGGGTGTGATTTGCTTTCGTTTATGATAGTTTTGTTAAGGTTTTGAATTTGTTCATTGATAGTCTTAGCTTCTTATAAGATTTTTGTTTATGGGTATTATTATAATATGTTTTTATTTGTTATGGTTGTTTTACTTTTGTCTCTATTTGTTACTTTTAGTTCGTTGAATATGTTTATTTTTTATGTGTTTTTCGAAGTTAGTTTGATTCCGACTTTAATTTTGATTGTTGGATGAGGCTATCAA…
nad4L	9386	9676	291	-7	ATG	TAA	L	ATGGTGATTTTTTGCTTGTTGTTTTCTGTGTTAATATATTTTATAGGTTTAGTTTCTTTTTGTATGAAACGTAATCACTTACTACTTATGCTTTTGAGGTTAGAATTTGTTACTTTATCATTATATATGAATTTATATTTATATCTAATGTTTTTTAATTATGAGTTTTATTTTAGTATAGTTTTTATTAGTATAGGGGTATGCGAAGGAGCTCTTGGCCTTGCAATTTTAGTTTCTATAGTTCGTACTCATAGAAATGATTATTTTCAATCTTTTAATGTATTATGATAA
trnT	9679	9743	65	2			H	GTTTTAATAATTTAATATAAAATACTGGTCTTGTAAACCAGAAATAAGATTCACCTTTTAAAACA
trnP	9744	9808	65				L	CAGAGAATAGTTTAATTAAAATATTAATTTTGGAGATTATCGATAGAGGTTAACTCTTTCTCTGA
nad6	9810	10313	504	1	ATC	TAA	H	ATCATCATAATACTTATAATATTCATATTTACCTGCTCACTAATATTAATCTGCTTAACACATCCTATTTCGATAGGAGCAATTCTTCTATTACAAACAATCACTATTACATTAACCATCGGATTCTTTCACGCAAACTTCTGATACTCTTATATTCTATTTCTTGTAATAGTTAGAGGAATGCTAGTTTTATTTGCATACATAACAAGTGTAGCATCAAATGAAAAATTTACCCCATCAATTAAAATCTCAATTATAGTCACATTTATTATCATTGTATTCATGTTTATAATGATTATAATAGACCCATACTACTCTAACATAAACATAACTTTTTATGACTCAATTCAAGATTCATACTCATACAACTTATCCATAAGAAAATATTTTAATTACCCA…
cyt b	10313	11455	1143	-1	ATG	TAG	H	ATGAAAACACCTATACGAAAGATATCGCCATTATTCAAAATTATCAATAACTCCTTAATTGACCTCCCTACACCATCTAATATCTCAGCATGATGAAACTTTGGATCATTATTAGGCCTTTGCTTAATTGTACAAATCCTGACAGGAATCTTCTTAGCAATACATTATACAGCTCATATTGACTATGCCTTTAATAGAGTAATTCATATTTGTCGAGACGTAAACTACGGATGACTTTTACGAACTCTTCATGCAAATGGAGCATCATTCTTTTTCGTTTGCATCTATCTTCATATTGGACGAGGTATTTATTATAGAAGGTACAACCTACACCTTACATGATCAGTTGGAATTATTATTCTATTTATAACAATAGCAACAGCCTTTCTAGGATATGTC…
S_copy2	11454	11520	67	-2			H	AGCTAATGAACTTGTATAAGTGTATATTTTGAAAATATAAAAAAGAGGCTTTACCCTCTATTAGCTT
nad1	11542	12492	951	21	ATT	TAA	L	ATTTTTATACTTGATTTGATTCTATTATTAGTTGTTGGAATAGTTTTGGTGATTTGTGTTTTAGTTGGGGTTGCTTTTTTAACTTTAATGGAACGAAAGGTTTTAGGTTATATTCAGATTCGTAAGGGGCCAAACAAAGTTGGGTTTATAGGTATTTTACAACCCTTTAGTGATGCAATTAAGTTATTTACCAAGGAGCAAACTTATCCTTTTATATCTAATTTTTTTATGTATTATATATCTCCTGTTTTTAATTTGTTTTTGTCGTTAATGTTATGAATGTGTATGCCTTTTTTAACTTTGTTATTTAATTTTAATTTAGGGGTGTTGTATTTTCTTTGTTGTTCTAGTTTATCTGTTTATACTATTATAATTGCTGGGTGGTCTTCTAATTCTAAT…
L_copy2	12494	12556	63	1			L	ATTACTTTGGCAGACTAGTGCTTTAAATTTAGAATTTAAATATGTATTTATATACAAGTAATA
rrnL	12557	13836	1280				L	AATGAATATTTAATTTTCTAGTTATGAAAAAAGTTTTTTTAATGCGAGTATGTTTTTGAAAGTAAGAGTTTTATGATAGTGAATAGTATAGTGATAGAACTATGAGATAGTTGTTTAATTAGTAAAAAGAATAGTTAATTTCTTGTACCTTGTGTATCAGGGTTTATTAAAATTCGTTATTTATATAATTTTCTCGAATTAGGGAGAGCTATAATGCTATAAATTTAATTGTGGTATAAATTTTTATAATAGTGTTATGGGAGTGAAATGTTATTCGTTCCCTAAGATATCTAGTTTCTTAAGAAATAAATTTAATTTAGGTCTTCATTTTGCATGGTATTTATTAAGTAGTTTTATGTTGTGTCGGACTAATATTTTAAGGGATAAGCTTTAAAATAG…
trnV	13837	13906	70				L	CAAATTAGAGCTTGATAGAAAGTATTTTATTTACATTAAAAGGTTAGTTGTGAGAATCAATTTAATTTGA
rrnS	13907	14690	784				L	ATATATAAAGTTTTATTTTGGCTTGTAATTTTGATACTCGAATTTAATATATGTGAGTTTTTGTGTACTTAGTATTTTTATATAATAGGAATAGTTTTTATTTTTGCAATATAGAGAATTGAATATGAAATAAGTTTTGATTTAGGAATTCGTTATAGCTCTGATAAAATTTGTGCCAGCAATCGCGGTTACACAGATGGGGCAATTAAGTTTTTTTCGGTTAATAATAATTTAGATTTTTTATAATGTTAGTTTAGAGTTATTAGGTGAAATTAGTAACTTTGATATATATTTTAATTTAGATAATGAGGTTATGAGGTTTTTATAATAAACTAGGATTAGATACCCTATTATTGAAAATGCAAATTTGATGCCTGAGTATTAGTAGCTATGTTCTTG…
Overlap:	10	gap:	6

## Sheet: Megasoma elephas elephas
Gene	Position		Size	Intergenic nucleotides	Codon
	From	To			Start	Stop	Strand	Sequence
trnQ	1	65	65				L	TGCAGACTTTTTTGGATGGACAGGGATTTTGACCCCCTTTCCAAAAAAAAATTTTTTACCTTTAG
trnI	478	539	62	412			H	AATGAAGTGTCTGAATAAAGAGTTATTTTGATAGAATAAAAAATGTGTAAAACACCTTCATT
trnM	540	607	68				H	AAAAAGATAAGCTAAGAAAGCTAATGGGTTCATACCCCATCAATAAAGGTCAACTCCTTTTCTTTTTA
nad2	608	1615	1008		ATC	TAA	H	ATCTATTATAAAATTCTATTTTATAATTCTCTCATGATTGGAACCCTAATTGCCATTTCTTCTTATTCATGAATAAGAATATGAATTGGTTTAGAAATCAACCTATTATCAATTATCCCCTTAATAAGAAGAACTAATAACATAATAGCATCAGAAGCCTCCCTAAAATATTTTATTACACAAGCCATGGCATCATCCTTACTTCTATTTGCAATTACTCTTATTGCCATGAATAATCTAATCAACATAAATTCAAACCTGTACCTAGCCCTTGTACTCAACACAGCATTATTTATCAAAATAGGAGCAGCCCCATTTCACTTCTGATTTCCAGAAGTATCAGAAGGCCTATCCTGAAAAAACATAATTATTATATTAACTTGACAAAAACTAGCCCCT…
trnW	1615	1680	66	-1			H	AAGGATTTAAGTTAAAAAAACTAAGAACCTTCAAAGTTCTAAATAAAGTAAGCTCTTTAAGCCTTA
trnC	1673	1736	64	-8			L	AGGCTTATAGTCTATGTAGGACACTAAGTTGCAAACTTAGAGGAGGATGGTATTCCTAAGGCTT
trnY	1736	1799	64	-1			L	GATTAAGTGGCCGAGGTTAGGCGGTAAATTGTAAATTTACATACGAATTAAAATTCCTTTTTCA
cox1	1801	3331	1531	1	ATT	T	H	ATTAAATGATTATTTTCAACAAACCATAAAGACATTGGGACACTATACTTCTTATTTGGCACCTGGTCAGGAATAGTAGGTACTTCACTAAGACTTCTAATCCGAGCTGAACTGGGGAATCCAGGATCACTAATTGGGGACGACCAAATCTACAACGTAATTGTAACAGCTCACGCTTTTATTATAATCTTTTTTATAGTTATGCCAATTATAATTGGAGGATTTGGCAATTGACTCGTACCATTAATACTTGGGGCCCCAGACATAGCATTCCCCCGAATAAATAACATAAGATTTTGACTTCTACCCCCTTCTTTAACTCTTCTTCTAGCTAGAAGAATAGTAGAAAACGGGGCTGGAACAGGATGAACAGTATACCCTCCTCTTTCCGCCAACATT…
trnL	3332	3398	67				L	TTCTAAAAAAAGGTAGGGACCTTTATAAATGGAGCTTAAGACCATTGCACTATTCTGCCATATTAGA
cox2	3399	4086	688		ATC	T	H	ATCGCCACATGAAAATTATTATTACTCCAAGATGGAGCATCACCATTAATGGAACAATTAACCTTCTTCCATAATCATGCAATAATAATTCTATTCATAATTACTGTCTTAGTAGGTTACATAATAAGAACTCTATTTTTCAATGAATTTAATAACCGATTTCTTCTAGAAGGTCAAACAATCGAAATCATCTGAACCACTTTACCAGCTATTACTTTAATCTTCATTGCACTTCCATCTTTACGACTATTATATCTTCTTGATGAAATCAATAACCCCCTTGTATCTATCAAAGCCATTGGGCATCAATGATACTGATCATATGAATATGGAGACTTTAAAAATTTTGAGTTTGATTCTTACATAATCCCCCTAGACTCATTATCTCTAAAAAGATTT…
trnK	4087	4157	71				H	CATTAGGTGACTGAAAGTAAGTAATGGTCTCTTAAACCAAAAAATAGTATTTTAACACATACTCCTGATGA
trnD	4181	4243	63	23			H	AAAAATTTAGTTAATAAATAACATTAACTTGTCAAGTTAAAATAGTCTTCAAGATAATTTTTG
atp8	4244	4399	156		ATT	TAA	H	ATTCCTCAAATATCACCTCTTAATTGACTCGCTTTATTTTCTTTGTTTATTATTGTATTTCTAACCTTTAATGTAATCAATTACTTCACATTCTTATATACACCAAAAAAGTCTATCCCTAACCCTCCTTTTAAAAAAATTAGATGAAAATGATAA
atp6	4393	5064	672	-7	ATG	TAA	H	ATGATAACTAACCTATTTTCCTCATTTGATCCATCATCATATTTTAAACTATCCCTTAATTGATTAAGAACTTTCCTAGGAATCATATTAATCCCATCAACATTCTGATTAATCCCCTCACGATACAACATATTATGAAATAATATCACTATAGCCCTTCATAATGAATTTAAAGTTTTAATTGGTCCAAGCGTAAAAGGAAGAACCCTAATCTTTGTTTCCCTCTTTTCTATAATTCTATTCAACAACTTCCTGGGCCTATTCCCATACATTTTTACAAGAACAAGACACATAGTGTTAACACTAACACTCGCCCTACCCTTGTGATTAAGATTTATAATTTATGGATGAATTAATCGAACTACCCACATACTAGCCCACCTAGTTCCTCAAGGAACT…
cox3	5064	5850	787	-1	ATG	T	H	ATGTCAGCACACAAAAACCATCCATTTCACCTTGTTGACCCAAGACCTTGGCCTATTCTTGGAGCCTTTAGAGCAATAATTACTCTTGTTGGACTAATTAAATGATTCCATTTTTACACCCCATCCTTATTTCTAATTGGGATATTAATCACTATATTAATTATATTTCAATGATGACGAGATATTGTCCGAGAAAGAACATTCCAAGGCTTACACACATATCCTGTAACCATAGGACTCCGATGAGGAATAATTCTATTTATTACATCAGAAGTATTCTTCTTTATTTCATTTTTCTGAGCATTCTTTCATAGAAGCCTAGCACCAACTATTGAATTAGGAATAAACTGACCTCCAAAGGGAATTCATCCATTCAACCCAATCCAAATCCCCTTACTT…
trnG	5851	5914	64				H	ATTCATATAGTATACAAATTATATTTGACTTCCAATCAAAAGAGCTAGAAAACTAGTATGAATA
nad3	5915	6268	354		ATC	TAG	H	ATCCAAATAATCTTTTTAATAGGGATAATCATCCTCTTTATCTCATCAGTACTAATAACAATCTCATTCGTTATCTCAAAAAAAAGGTTTACAGATCGAGAAAAGTCTTCCCCCTTTGAATGTGGGTTTGACCCAAAAAGATCTCCACGAATCCCATTCTCAATTAACTTTTTCCTAATCGCTGTAATTTTCCTAATCTTTGATGTAGAAATTGCCCTCCTAATCCCAATTATTCTAATTATAAAAATAACTAAACTGTTAACCTACTTCATAATCTCACTCTTTTTTCTTGCAATTCTTCTAATTGGCCTATATCATGAATGAAACCAAGGAGCACTAAACTGAGCAATCTAG
trnA	6267	6330	64	-2			H	AGGGTAATAGTTAACCATAACATTTAACTTGCACTTAAAAAGTATTGAATAATCAATTTACCTT
trnR	6331	6396	66				H	AAATAAGAAACAAATAATTGTATTTAGTTTCGACCTAAACCTATGGTGGAAACCCACCCTTATTTA
trnN	6400	6465	66	3			H	TTAATTGAAACCAAAATAGAGGTATATCACTGTTAATGATAAAAATGAGAATAATCTCCAATTAAA
trnS	6466	6532	67				H	GAAATAGGAAATTCAAGAATAAGCTTCTAACTTAATTCTTTAGCAGTGTAAATCTGTTAATATTTCT
trnE	6533	6595	63				H	ATTTATATAGTTTAACCAAAACATTACATTTTCAATGTAAAATTAGAATTCATCTTATAAATA
trnF	6594	6657	64	-2			L	ATTTAAATAGCTTATTTAGAGCGAGATACTGAAGATATCTAGGAAGTAGTTATACTTTTAAATA
nad5	6658	8371	1714		ATT	T	L	ATTTGCTTGATTTATTTTGTTGTGTTTTTGGTTTCAAGAATTATTTCTTTTTTGGGGAGTTTGTTATTGATAGTTAGAGAATACAGAATCTTGTTGGAGTATGAAGTTTTAAATATTAATTCATGTGGAATTATAATAACTATTTTGCTAGATTGAATATCTTTATTATTTATGAGATTTGTTTTGTTTATTTCATCGATAGTTGTTTTTTATAGGGAAGAATATATAGAGGGGGATGTTTTTATTAATCGTTTTATTATGTTGGTTTCTATGTTTGTTTTGTCAATAATGTTGTTAATTATTAGTCCAAACTTGATTAGAATTTTACTTGGCTGAGATGGGTTAGGACTAGTGTCTTATGCTTTAGTTATTTATTATCAGAATGTTAAGTCATATAAT…
trnH	8372	8435	64				L	ATTTAAATAGTTTAATTAAAATGTTGATTTGTGGTGTCAAAGATGTAATTTTTTACTTTAAATT
nad4	8435	9772	1338	-1	ATG	TAA	L	ATGATAAAGTTCTTAATTGCTTTGGTTTTTTTGGTTCCTTTAAGATTAATTAAGAATAGGTTTTGATTAAATCAGTACTTATATTTTATTTTGACTTTTTTTTTCTGTTTTTTATTTAGTGTTGGGTATCAGGTTAGTTATATTTCTTATTTTTTTGGGTGTGACTTGCTGTCTTTTATGATGGTTTTGTTAAGGTTTTGAGTTTGTTCTTTAATAATTTTAGCTTCTCAGAAGATTTATATTTTTGAGTATTATTATAACATGTTTTTGTTTATTATAATTAGATTGTTAATTTCTTTGGTTTTGACTTTTAGGTCAATAAATATATTTATATTTTATTTATTTTTTGAGGTTAGGTTAATTCCTACATTGATTTTAATTGTGGGTTGGGGGTACCAA…
nad4L	9766	10056	291	-7	ATG	TAA	L	ATGGTAATATTTTGTTTGTTGTTTAGTGTTTTTATGTATTTTGCTGGTTTAGTTTCTTTTTGCATTAAACGTAAGCATTTATTGTTGATGTTGTTGAGATTAGAATTTGTTGTTCTTTCATTATATTTTAATTTGTATATGCTTTTGATGCTTTTTGACTGTGAATTTTATTTTAGAATAGTTTTTATTAGAATAAGTGTATGTGAGGGGGCTCTTGGCTTATCAATTCTTGTTTCTATAGTTCGAACTCATAGAAATGATTATTTTCAATCTTTTAATATTTTATGATAA
trnT	10059	10123	65	2			H	GTTTTAATAATTTAATATAAAATACTGGTCTTGTAAACCAGAGATAAGAAGCATCTTTTAAAACT
trnP	10124	10190	67				L	CAGAGAATAGTTTAATTAAAATATTAATTTTGGAGATTAATGTTAGGGAGTAAGTCTCTTTCTCTGA
nad6	10192	10695	504	1	ATC	TAA	H	ATCATCCTTCTCCTTATAATATTAACCTTTTTTTGCTCAACAACCCTAATTTGCCTAAGTCATCCTATTTCAATAGGAGCAATTCTTCTTTTACAAACAATCTCTATCACCTTAACAATTGGCTATTTTCACACAAACTTTTGATATTCCTATATTCTTTTTTTAATTATAGTAAGAGGTATACTAGTACTCTTTGCCTACATAACAAGAGTTGCATCAAATGAAAAATTTACCCCTTCAATCAAAATCTTTATTATAATATTAACCATTACACTTTTATTCCTAATTATATTTATAATTATAGACCCATTCTATCCAAGAATCAATAATACATTCATGGATAGAATCACATCAACTCCCTCTTTCCAAACTTCAATAAGCAAATACTTTAACTATCCT…
cyt b	10695	11837	1143	-1	ATG	TAA	H	ATGAAAACACCTCTACGAAAAATATCACCATTATTTAAAATTATCAACAATTCATTAATTGACCTGCCAACACCAACTAACATCTCAGCCTGATGAAACTTTGGGTCACTTCTAGGCTTATGTCTAATTATCCAAATCATTACCGGAATCTTTCTAGCCATACACTTCACTGCCCATGTAGATCATGCATTCAATAGGGTTATCCACATCTGTCGAGATGTCAACTATGGGTGGCTTCTTCGAACCCTCCATGCAAATGGAGCTTCATTCTTCTTTGTATGTATCTATCTCCATATTGGACGAGGAATATATTACAGAAGATATAATCTTCACCTAACTTGATCCGTAGGAGTAATTATTCTATTTCTAACAATAGCTACTGCCTTCCTAGGGTATGTC…
S_copy2	11836	11898	63	-2			H	AACTAATAAACTACAAAATTCATTTTCTCAAAAAATTAAAGAGGCCTTTTCTATATTAACTTT
nad1	11916	12866	951	17	ATT	TAA	L	ATTAGTATGAAGGATATGTTATTGGTTGTATTTTCTGGATTAATTTTGGTTGTTTGTGTATTAGTGGGGGTTGCTTTTTTGACTTTGATGGAACGTAAAGTTTTAGGTTATATTCAGATTCGAAAGGGGCCTAATAAGGTTGGATTTTTAGGTGTTATGCAACCTTTTAGTGATGCAATTAAATTGTTTACAAAGGAGCAAACTTATCCTTTTATGTCTAATTTTATTATATATTATATATCTCCTGTGTTTAGTTTATTTTTATCATTGTTTATGTGGATGTGTATTCCTTTTTTTACTTTTTTTTTAAATTTTAATTTGGGTATTTTGTATTTCCTTTGTTGTTCTAGGTTGGGCGTGTATACAATTATGATTGCGGGCTGGGCTTCAAACTCTAAT…
L_copy2	12868	12930	63	1			L	ATTACCTTGGCAGATTAGTGCTTTAGATTTAGAATTTAAATATGTATTTATATACAGGTAATA
rrnL	12931	14205	1275				L	GATGATTTTTTTATTTTTAGGTTATGGAAGAAGTATCTTTAATGGTAGTATATTTTAGAAATTAATTGAATAATGATAGTGAATAGTATAGTGATAGGACTATGAGTTACGTTGTTAGTTATAAAAAAGAAGAATTGATTTTTTGTACCTTGTGTATCAGGGTTTATTAAAATAGGTTTATTATTTGGCTTTCTCGAATTAGAAAGAGCTATAACTTTATAAATTTAATTGTGGCATAAGTTTTTTAAATAGAGTTATGGTAGTGAAATGTTAGTCGTTTTTTATGATATCTGGTTTCTTAAGAAACAAATTTAATTTGGTTTTTTGAATCTACAGGATTGATTTTTATAGTTTTGTAATTTAAAGATTTAATGTTCCTGGGGATAAGCTTGGGAACAG…
trnV	14206	14275	70				L	CAAATTAGAGCTTGATAGAAAGCATTTTATTTACACTAAAAAGTTAATTGTGAGAATCAATTTAATTTGA
rrnS	14276	15060	785				L	TTTATCCTAGCTAAAAATTTTAATTTATAGACGTGATTATATACAAATTTTAGTGTTTATTTATTATGTTGTATACCAACATTTTAAGATTAAATTATTGAGTTGTAATATAGAGATTTAAATATAAAGGTTGCTTTGATTTAGGGATTTATAATAATGTTGATAAAATTTGTGCCAGCAATTGCGGTTATACAGATGACGTGATTAAATTTGTTCGGTTTGTAATAATTTAGATTATTTTTATTAAGACTTAACCTTATTAGGTGAAATTTCTAAGGTTGAAAAAGATTTTATTATAAGTAATGAAGTTATGAGGTTTTTATGATAGACTAGGATTAGATACCCTATTATTGAAAATGCAAATTTTGTGTGCCGGATTATTAGTAGCTACGTTCTTGA…
Overlap:	11	gap:	8

## Sheet: Megasoma mars
Gene	Position		Size	Intergenic nucleotides	Codon
	From	To			Start	Stop	Strand	Sequence
trnQ	1	65	65				L	TGCAGACTTTTTTGGATGGACAGGGATTTTGACCCCCTTTCCAAAAAAAAATTTTTTACCTTTAG
trnI	478	539	62	412			H	AATGAAGTGTCTGAATAAAGAGTTATTTTGATAGAATAAAAAATGTGTAAAACACCTTCATT
trnM	540	607	68				H	AAAAAGATAAGCTAAGAAAGCTAATGGGTTCATACCCCATCAATAAAGGTCAACTCCTTTTCTTTTTA
nad2	608	1615	1008		ATC	TAA	H	ATCTATTATAAAATTCTATTTTATAATTCTCTCATGATTGGAACCCTAATTGCCATTTCTTCTTATTCATGAATAAGAATATGAATTGGTTTAGAAATCAACCTATTATCAATTATCCCCTTAATAAGAAGAACTAATAACATAATAGCATCAGAAGCCTCCCTAAAATATTTTATTACACAAGCCATGGCATCATCCTTACTTCTATTTGCAATTACTCTTATTGCCATGAATAATCTAATCAACATAAATTCAAACCTGTACCTAGCCCTTGTACTCAACACAGCATTATTTATCAAAATAGGAGCAGCCCCATTTCACTTCTGATTTCCAGAAGTATCAGAAGGCCTATCCTGAAAAAACATAATTATTATATTAACTTGACAAAAACTAGCCCCT…
trnW	1615	1680	66	-1			H	AAGGATTTAAGTTAAAAAAACTAAGAACCTTCAAAGTTCTAAATAAAGTAAGCTCTTTAAGCCTTA
trnC	1673	1736	64	-8			L	AGGCTTATAGTCTATGTAGGACACTAAGTTGCAAACTTAGAGGAGGATGGTATTCCTAAGGCTT
trnY	1736	1799	64	-1			L	GATTAAGTGGCCGAGGTTAGGCGGTAAATTGTAAATTTACATACGAATTAAAATTCCTTTTTCA
cox1	1801	3331	1531	1	ATT	T	H	ATTAAATGATTATTTTCAACAAACCATAAAGACATTGGGACACTATACTTCTTATTTGGCACCTGGTCAGGAATAGTAGGTACTTCACTAAGACTTCTAATCCGAGCTGAACTGGGGAATCCAGGATCACTAATTGGGGACGACCAAATCTACAACGTAATTGTAACAGCTCACGCTTTTATTATAATCTTTTTTATAGTTATGCCAATTATAATTGGAGGATTTGGCAATTGACTCGTACCATTAATACTTGGGGCCCCAGACATAGCATTCCCCCGAATAAATAACATAAGATTTTGACTTCTACCCCCTTCTTTAACTCTTCTTCTAGCTAGAAGAATAGTAGAAAACGGGGCTGGAACAGGATGAACAGTATACCCTCCTCTTTCCGCCAACATT…
trnL	3332	3398	67				H	TCTAATATGGCAGAATAGTGCAATGGTCTTAAGCTCCATTTATAAAGGTCCCTACCTTTTTTTAGAA
cox2	3399	4086	688		ATC	T	H	ATCGCCACATGAAAATTATTATTACTCCAAGATGGAGCATCACCATTAATGGAACAATTAACCTTCTTCCATAATCATGCAATAATAATTCTATTCATAATTACTGTCTTAGTAGGTTACATAATAAGAACTCTATTTTTCAATGAATTTAATAACCGATTTCTTCTAGAAGGTCAAACAATCGAAATCATCTGAACCACTTTACCAGCTATTACTTTAATCTTCATTGCACTTCCATCTTTACGACTATTATATCTTCTTGATGAAATCAATAACCCCCTTGTATCTATCAAAGCCATTGGGCATCAATGATACTGATCATATGAATATGGAGACTTTAAAAATTTTGAGTTTGATTCTTACATAATCCCCCTAGACTCATTATCTCTAAAAAGATTT…
trnK	4087	4157	71				H	CATTAGGTGACTGAAAGTAAGTAATGGTCTCTTAAACCAAAAAATAGTATTTTAACACATACTCCTGATGA
trnD	4181	4243	63	23			H	AAAAATTTAGTTAATAAATAACATTAACTTGTCAAGTTAAAATAGTCTTCAAGATAATTTTTG
atp8	4244	4399	156		ATT	TAA	H	ATTCCTCAAATATCACCTCTTAATTGACTCGCTTTATTTTCTTTGTTTATTATTGTATTTCTAACCTTTAATGTAATCAATTACTTCACATTCTTATATACACCAAAAAAGTCTATCCCTAACCCTCCTTTTAAAAAAATTAGATGAAAATGATAA
atp6	4393	5064	672	-7	ATG	TAA	H	ATGATAACTAACCTATTTTCCTCATTTGATCCATCATCATATTTTAAACTATCCCTTAATTGATTAAGAACTTTCCTAGGAATCATATTAATCCCATCAACATTCTGATTAATCCCCTCACGATACAACATATTATGAAATAATATCACTATAGCCCTTCATAATGAATTTAAAGTTTTAATTGGTCCAAGCGTAAAAGGAAGAACCCTAATCTTTGTTTCCCTCTTTTCTATAATTCTATTCAACAACTTCCTGGGCCTATTCCCATACATTTTTACAAGAACAAGACACATAGTGTTAACACTAACACTCGCCCTACCCTTGTGATTAAGATTTATAATTTATGGATGAATTAATCGAACTACCCACATACTAGCCCACCTAGTTCCTCAAGGAACT…
cox3	5064	5850	787	-1	ATG	T	H	ATGTCAGCACACAAAAACCATCCATTTCACCTTGTTGACCCAAGACCTTGGCCTATTCTTGGAGCCTTTAGAGCAATAATTACTCTTGTTGGACTAATTAAATGATTCCATTTTTACACCCCATCCTTATTTCTAATTGGGATATTAATCACTATATTAATTATATTTCAATGATGACGAGATATTGTCCGAGAAAGAACATTCCAAGGCTTACACACATATCCTGTAACCATAGGACTCCGATGAGGAATAATTCTATTTATTACATCAGAAGTATTCTTCTTTATTTCATTTTTCTGAGCATTCTTTCATAGAAGCCTAGCACCAACTATTGAATTAGGAATAAACTGACCTCCAAAGGGAATTCATCCATTCAACCCAATCCAAATCCCCTTACTT…
trnG	5851	5914	64				H	ATTCATATAGTATACAAATTATATTTGACTTCCAATCAAAAGAGCTAGAAAACTAGTATGAATA
nad3	5915	6268	354		ATC	TAG	H	ATCCAAATAATCTTTTTAATAGGGATAATCATCCTCTTTATCTCATCAGTACTAATAACAATCTCATTCGTTATCTCAAAAAAAAGGTTTACAGATCGAGAAAAGTCTTCCCCCTTTGAATGTGGGTTTGACCCAAAAAGATCTCCACGAATCCCATTCTCAATTAACTTTTTCCTAATCGCTGTAATTTTCCTAATCTTTGATGTAGAAATTGCCCTCCTAATCCCAATTATTCTAATTATAAAAATAACTAAACTGTTAACCTACTTCATAATCTCACTCTTTTTTCTTGCAATTCTTCTAATTGGCCTATATCATGAATGAAACCAAGGAGCACTAAACTGAGCAATCTAG
trnA	6267	6330	64	-2			H	AGGGTAATAGTTAACCATAACATTTAACTTGCACTTAAAAAGTATTGAATAATCAATTTACCTT
trnR	6331	6396	66				H	AAATAAGAAACAAATAATTGTATTTAGTTTCGACCTAAACCTATGGTGGAAACCCACCCTTATTTA
trnN	6400	6465	66	3			H	TTAATTGAAACCAAAATAGAGGTATATCACTGTTAATGATAAAAATGAGAATAATCTCCAATTAAA
trnS	6466	6532	67				H	GAAATAGGAAATTCAAGAATAAGCTTCTAACTTAATTCTTTAGCAGTGTAAATCTGTTAATATTTCT
trnE	6533	6595	63				H	ATTTATATAGTTTAACCAAAACATTACATTTTCAATGTAAAATTAGAATTCATCTTATAAATA
trnF	6594	6657	64	-2			L	ATTTAAATAGCTTATTTAGAGCGAGATACTGAAGATATCTAGGAAGTAGTTATACTTTTAAATA
nad5	6658	8371	1714		ATT	T	L	ATTTGCTTGATTTATTTTGTTGTGTTTTTGGTTTCAAGAATTATTTCTTTTTTGGGGAGTTTGTTATTGATAGTTAGAGAATACAGAATCTTGTTGGAGTATGAAGTTTTAAATATTAATTCATGTGGAATTATAATAACTATTTTGCTAGATTGAATATCTTTATTATTTATGAGATTTGTTTTGTTTATTTCATCGATAGTTGTTTTTTATAGGGAAGAATATATAGAGGGGGATGTTTTTATTAATCGTTTTATTATGTTGGTTTCTATGTTTGTTTTGTCAATAATGTTGTTAATTATTAGTCCAAACTTGATTAGAATTTTACTTGGCTGAGATGGGTTAGGACTAGTGTCTTATGCTTTAGTTATTTATTATCAGAATGTTAAGTCATATAAT…
trnH	8372	8435	64				L	ATTTAAATAGTTTAATTAAAATGTTGATTTGTGGTGTCAAAGATGTAATTTTTTACTTTAAATT
nad4	8435	9772	1338	-1	ATG	TAA	L	ATGATAAAGTTCTTAATTGCTTTGGTTTTTTTGGTTCCTTTAAGATTAATTAAGAATAGGTTTTGATTAAATCAGTACTTATATTTTATTTTGACTTTTTTTTTCTGTTTTTTATTTAGTGTTGGGTATCAGGTTAGTTATATTTCTTATTTTTTTGGGTGTGACTTGCTGTCTTTTATGATGGTTTTGTTAAGGTTTTGAGTTTGTTCTTTAATAATTTTAGCTTCTCAGAAGATTTATATTTTTGAGTATTATTATAACATGTTTTTGTTTATTATAATTAGATTGTTAATTTCTTTGGTTTTGACTTTTAGGTCAATAAATATATTTATATTTTATTTATTTTTTGAGGTTAGGTTAATTCCTACATTGATTTTAATTGTGGGTTGGGGGTACCAA…
nad4L	9766	10056	291	-7	ATG	TAA	L	ATGGTAATATTTTGTTTGTTGTTTAGTGTTTTTATGTATTTTGCTGGTTTAGTTTCTTTTTGCATTAAACGTAAGCATTTATTGTTGATGTTGTTGAGATTAGAATTTGTTGTTCTTTCATTATATTTTAATTTGTATATGCTTTTGATGCTTTTTGACTGTGAATTTTATTTTAGAATAGTTTTTATTAGAATAAGTGTATGTGAGGGGGCTCTTGGCTTATCAATTCTTGTTTCTATAGTTCGAACTCATAGAAATGATTATTTTCAATCTTTTAATATTTTATGATAA
trnT	10059	10123	65	2			H	GTTTTAATAATTTAATATAAAATACTGGTCTTGTAAACCAGAGATAAGAAGCATCTTTTAAAACT
trnP	10124	10190	67				L	CAGAGAATAGTTTAATTAAAATATTAATTTTGGAGATTAATGTTAGGGAGTAAGTCTCTTTCTCTGA
nad6	10192	10695	504	1	ATC	TAA	H	ATCATCCTTCTCCTTATAATATTAACCTTTTTTTGCTCAACAACCCTAATTTGCCTAAGTCATCCTATTTCAATAGGAGCAATTCTTCTTTTACAAACAATCTCTATCACCTTAACAATTGGCTATTTTCACACAAACTTTTGATATTCCTATATTCTTTTTTTAATTATAGTAAGAGGTATACTAGTACTCTTTGCCTACATAACAAGAGTTGCATCAAATGAAAAATTTACCCCTTCAATCAAAATCTTTATTATAATATTAACCATTACACTTTTATTCCTAATTATATTTATAATTATAGACCCATTCTATCCAAGAATCAATAATACATTCATGGATAGAATCACATCAACTCCCTCTTTCCAAACTTCAATAAGCAAATACTTTAACTATCCT…
cyt b	10695	11837	1143	-1	ATG	TAA	H	ATGAAAACACCTCTACGAAAAATATCACCATTATTTAAAATTATCAACAATTCATTAATTGACCTGCCAACACCAACTAACATCTCAGCCTGATGAAACTTTGGGTCACTTCTAGGCTTATGTCTAATTATCCAAATCATTACCGGAATCTTTCTAGCCATACACTTCACTGCCCATGTAGATCATGCATTCAATAGGGTTATCCACATCTGTCGAGATGTCAACTATGGGTGGCTTCTTCGAACCCTCCATGCAAATGGAGCTTCATTCTTCTTTGTATGTATCTATCTCCATATTGGACGAGGAATATATTACAGAAGATATAATCTTCACCTAACTTGATCCGTAGGAGTAATTATTCTATTTCTAACAATAGCTACTGCCTTCCTAGGGTATGTC…
S_copy2	11836	11897	62	-2			H	AACTAATAAACTACAAAATTCATTTTCTCAAAAAATTAAAGAGGCCTTTTCTATATTAACTT
nad1	11916	12866	951	18	ATT	TAA	L	ATTAGTATGAAGGATATGTTATTGGTTGTATTTTCTGGATTAATTTTGGTTGTTTGTGTATTAGTGGGGGTTGCTTTTTTGACTTTGATGGAACGTAAAGTTTTAGGTTATATTCAGATTCGAAAGGGGCCTAATAAGGTTGGATTTTTAGGTGTTATGCAACCTTTTAGTGATGCAATTAAATTGTTTACAAAGGAGCAAACTTATCCTTTTATGTCTAATTTTATTATATATTATATATCTCCTGTGTTTAGTTTATTTTTATCATTGTTTATGTGGATGTGTATTCCTTTTTTTACTTTTTTTTTAAATTTTAATTTGGGTATTTTGTATTTCCTTTGTTGTTCTAGGTTGGGCGTGTATACAATTATGATTGCGGGCTGGGCTTCAAACTCTAAT…
L_copy2	12868	12930	63	1			L	ATTACCTTGGCAGATTAGTGCTTTAGATTTAGAATTTAAATATGTATTTATATACAGGTAATA
rrnL	12931	14205	1275				L	GATGATTTTTTTATTTTTAGGTTATGGAAGAAGTATCTTTAATGGTAGTATATTTTAGAAATTAATTGAATAATGATAGTGAATAGTATAGTGATAGGACTATGAGTTACGTTGTTAGTTATAAAAAAGAAGAATTGATTTTTTGTACCTTGTGTATCAGGGTTTATTAAAATAGGTTTATTATTTGGCTTTCTCGAATTAGAAAGAGCTATAACTTTATAAATTTAATTGTGGCATAAGTTTTTTAAATAGAGTTATGGTAGTGAAATGTTAGTCGTTTTTTATGATATCTGGTTTCTTAAGAAACAAATTTAATTTGGTTTTTTGAATCTACAGGATTGATTTTTATAGTTTTGTAATTTAAAGATTTAATGTTCCTGGGGATAAGCTTGGGAACAG…
trnV	14206	14275	70				L	CAAATTAGAGCTTGATAGAAAGCATTTTATTTACACTAAAAAGTTAATTGTGAGAATCAATTTAATTTGA
rrnS	14276	15057	782				L	ATCCTAGCTAAAAATTTTAATTTATAGACGTGATTATATACAAATTTTAGTGTTTATTTATTATGTTGTATACCAACATTTTAAGATTAAATTATTGAGTTGTAATATAGAGATTTAAATATAAAGGTTGCTTTGATTTAGGGATTTATAATAATGTTGATAAAATTTGTGCCAGCAATTGCGGTTATACAGATGACGTGATTAAATTTGTTCGGTTTGTAATAATTTAGATTATTTTTATTAAGACTTAACCTTATTAGGTGAAATTTCTAAGGTTGAAAAAGATTTTATTATAAGTAATGAAGTTATGAGGTTTTTATGATAGACTAGGATTAGATACCCTATTATTGAAAATGCAAATTTTGTGTGCCGGATTATTAGTAGCTACGTTCTTGAAAT…
Overlap:	11	gap:	8

## Sheet: Xylotrupes beckeri intermedius
Gene	Position		Size	Intergenic nucleotides	Codon
	From	To			Start	Stop	Strand	Sequence
trnQ	1	69	69				L	TATGATTTAGTATAGTATGTACATAGATTTTTGATATCTAAAGAAATAGTTTAAATCTGTTAATTATAA
trnI	133	195	63	63			H	AATGAAGTGTCTGAATAAAGAATTATTTTGATAGAATAAAACATGTGATTTTTCACCTTCATT
trnM	196	264	69				H	AAAAAGATAAGCTAATAAAGCTACTGGGTTCATACCCCATCAATAAAGGTCTCAATCCTTTTCTTTTTA
nad2	265	1272	1008		ATT	TAA	H	ATTTATTATAAAATCCTATTTTATTTAACACTAATAATTGGAACTTTTATTTCAATTTCATCTTATTCTTGAATAGGTATATGAATTGGATTAGAAATTAATCTTTTATCAATAATCCCCTTAATCAGTAAAATTAACAATATAATGGCATCCGAAGCTGCCTTAAAATATTTTATTACTCAAACACTAGCTTCTTCAATTTTATTACTTTCAATTATTATAATATCTATAAATAATATATACAATATAAATTCAATTTTATATTTTATAATAATTTTCAATACAGCTTTATTCACAAAAATAGGAGCTGCTCCATTYCACTTTTGATTTCCTGAAGTTATAGAAGGATTAAATTGAACAAACTCATTAATTATACTAACATGACAAAAATTAGCCCCT…
trnW	1272	1337	66	-1			H	AAGGATTTAAGTTAAAAAAACTAAGAACCTTCAAAGTTCTAAATAAAGTAAGCACTTTAAGCCTTA
trnC	1330	1392	63	-8			L	AGTCTTATAGTCTAATAAGGATAATAAATTGCAAATTTATTGGTGAATTTTAATCTAAGGCTT
trnY	1393	1456	64				L	GATAAAGTGGCCGAGTTATAGGCGGTAAACTGTAAATTTACAAACGAATTCTATTCCTTTATCA
cox1	1458	2988	1531	1	ATT	T	H	ATTAAATGATTATTTTCTACAAACCATAAAGATATTGGAACTTTATATTTTTTATTTGGAAGATGATCAGGTATAGTAGGGACATCTCTTAGTTTATTAATTCGAGCAGAATTAGGAAATCCTGGTTCATTAATTGGTGACGACCAAATCTACAATGTTATTGTAACTGCTCATGCTTTTATTATAATTTTTTTCATAGTTATGCCTATTATAATTGGGGGATTTGGAAATTGATTAGTTCCTCTTATACTAGGAGCCCCTGATATAGCTTTTCCTCGTATAAATAACATAAGATTTTGACTTTTACCTCCTTCATTAACTTTACTTTTAGCTAGAAGAATAGTAGAAAATGGTGCAGGAACTGGGTGAACAGTATATCCCCCTTTGTCAGCTAATATT…
trnL	2989	3054	66				L	TTCTAAAAAAAGGCGTAACCTTTATATATGGAGTTTAAGACCATTGCACTAATCTGCCATATTAGA
cox2	3055	3742	688		ATT	T	H	ATTGCAACATGAAATATATTAATACTTCAAGATAGGGCCTCCCCATTAATAGAACAATTAACCTTTTTTCATAACCATGCTTTAATAATTTTACTAATAATTACAGTATTAGTAGGTTATATAATAGTAACTTTATTTTTTAATCAATTTAATAACCGATTTTTATTAGAAGGACAAACAATTGAAATTATTTGAACTACTCTACCAGCAATTACTTTAATTTTTATTGCTTTACCCTCCTTACGACTTCTGTATCTTCTTGATGAAATCAATAACCCTTTAGTTTCTATTAAAGCTATCGGACATCAATGGTATTGATCTTATGAATATGGAGATTTTATAAATTTTGAGTTTGACTCTTACATAATCCCTTCAATGTCTATGCCTATTGAAAATTTC…
trnK	3743	3813	71				H	CATTAGATGGCTGAAAGTAAGCAATGGTCTCTTAAACCAGTCTATAGTAGATTCACGACTACTTCTAATGA
trnD	3814	3879	66				H	AAAAATTTAGTTAATCTTATATAACATTAACTTGTCAAGTTAAAATAATCTAAAAGATAATTTTTA
atp8	3880	4035	156		ATC	TAA	H	ATCCCACAAATAGCACCATTAAGTTGACTTATATTATTTTTTCTATTTGTTACAATTTTTTTTCTATTTAATATTATAAACTATTTTACTTTTCAATATCCAGTAAGGTTCAAGACAAAAAAAAGAACAATAAAAAAAATTAACTGAAAATGATAA
atp6	4029	4700	672	-7	ATG	TAA	H	ATGATAACAAATTTGTTTTCTTCTTTTGACCCAACAACATCTTTTAATTTATCTTTAAATTGAATAAGAACATTCCTTGGACTTTTACTAATCCCTTCTTCATATTGATTAATCCCATCCCGTTATAACTTTATTTGAATTAAAATTATTTCTACATTGCATAATGAATTTAAGGTTTTAATTGGGCCTAAAATTAAAGGAAGAACATTAATTTTTATCTCTCTATTTTCTATAATTTTATTTAATAATTTTTTAGGATTATTCCCTTATATTTTTACAAGAACTAGCCATATAGTATTAACATTAACCTTAGCTCTCCCATTATGATTAAGATTTATAATTTATGGATGAATTAATCATACAATACATATGTTTGCTCATCTTGTACCTCAAGGTACA…
cox3	4700	5486	787	-1	ATG	T	H	ATGTCAAGACATAAAAATCACCCATACCATCTTGTTGACCCTAGCCCTTGACCTATTTTAGGCGCATTCAGAGCAATGATTACATTAGTAGGAATTATTAAATGATTTCATTTTTATAATAATTCCCTATTTTTATTAGGAAGATTAATTACTATACTAATTATATATCAATGATGACGAGATATTGTCCGTGAAGGAACTTTCCAAGGTTTACACACATACCCAGTTACTATAGGCCTACGATGAGGAATAATTCTATTTATTACTTCAGAAATTTTCTTTTTTATTTCTTTTTTCTGAGCCTTCTTTCATAGAAGACTTGCTCCTACTATTGAATTAGGAATAAACTGACCGCCAAAAGGAATTACCCCATTTAATCCCCTTCAAATCCCATTACTT…
trnG	5487	5549	63				H	ATTTATATAGTATAATAATTATATTTGACTTCCAATCAAAAGATCTAATAATTAGTATAAATA
nad3	5550	5903	354		ATC	TAG	H	ATCATAATCATTTTTTATATTAGACTTATTATTTTTATTATTTCCTTTATCATAATTATAATTTCATTTATAATTTCCAAAAAAAGATTCATAGACCGAGAAAAAGCTTCCCCATTTGAGTGTGGATTTGACCCAAAAAGATCCGCTCGTATACCTTTTTCTATTCAATTTTTTTTAATTGCAGTAATCTTCTTAATTTTTGATGTTGAAATTGCTTTATTAATCCCAATTATCCTAATTATAAAAATAACTAATATTTTAATATATTTTATTATTACATTATTTTTTTTAAGAGTATTATTAATTGGCCTTTACCATGAATGAAACCAAGGAGCATTAACTTGAACTATTTAG
trnA	5902	5967	66	-2			H	AGGGTTATAGTTAAGTATAACATTTAATTTGCATTTAAAAAGTATTGATTTAATCAATTTACCTTA
trnR	5968	6033	66				H	AAATAAGAAACAAAGAATTGTATTTAGTTTCGACCTAAAATTTTGATGGTTAATCATCCTTATTTA
trnN	6034	6099	66				H	TTAATTGAAACCAAAATAGAGGTATATCACTGTTAATGATAAAACTGAGAAAATTCTCCAATTAAG
trnS	6100	6166	67				H	GAAATATGAAATTCAAGAATAAGCTTCTAACTTAATTCTTTAGCAGTGAAACTCTGTTAATATTTCT
trnE	6167	6230	64				H	ATTTATATAGTTTAATAAAAACATTATATTTTCAATATAAAATTAGAAACTTTTCTTATAAATA
trnF	6229	6294	66	-2			L	ATTTAAATAGCTTATATTTAGAGCAAGATATTGAAGATATCTAGGAAGTATTATTACTTTTAAATA
nad5	6295	8008	1714		ATT	T	L	ATTTGTTTAATTTATTTTATTAGGTTTTTATTTTTTAGAATTGTATTTTTTTTATTAAGATTGAATTTTATAGTTATAGATTATAGTTTATTATTAGAATATGAGGTATTAAATATTAATTCTTGTGGTATTATAATAACTATTTTATTAGATTGAATATCTTTATTATTTATAAGATTTGTATTATTTATTTCATCAATAGTAATTTATTATAGAGAAGAATATATAGAAGGTGATATTTTTATTAATCGTTTTATTATATTAGTTTCTATATTTGTTTTATCAATAATGTTATTGATTATTAGTCCCAATTTAATTAGAATTTTATTAGGTTGAGATGGGTTGGGCCTTGTTTCTTATTGTTTAGTAATTTATTATCAGAATGTTAAATCTTATAAT…
trnH	8009	8072	64				L	ATTTAAATAGTTTAATTAAAATATTGATTTGTGGTATCAAGGATGTAATTTATTACTTTAAATT
nad4	8072	9409	1338	-1	ATG	TAA	L	ATGATAAAATTTTTATTGGCTTTAATTTTTATAGTTCCTATAAGATTTATAAAGTATAGATTTTGATTAAATCAATATTTTTATTTTTTGATTACTTTTTTATATGGGTTTATATTTGTATTTAATTATCAATTTTCTTTTATTTCTTATTTTATAGGTTGTGATTTGTTATCTTTTATAATAGTTTTATTAAGATTTTGAATTTGTTCTTTAATAATTTTAGCTTCACAAAAAATTTACATAACTAATTATTTTTATAATGTTTTTATATTTGTTATAATTATGTTATTATTATCTTTGTATATAACTTTCAGGTCTATGAATTTATTTATATTTTATTTATTTTTTGAAGTAAGGTTAATTCCTACTTTAATYTTAATTGTGGGATGAGGCTATCAG…
nad4L	9403	9693	291	-7	ATG	TAA	L	ATGGTAGTTTTTTGTTTATTTTTTTCTTTATTTATATATTTTATAGGATTAATGTCTTTTTGTGTAAAACGTAAGCATTTATTGTTAATATTATTAAGATTAGAGTTTGTAATGTTATCATTATACTTTAATTTGTATTTGTATTTAATATATTTTAATTATGAGTTTTATTTTAGAATAATTTTTATTAGAATAAGAGTATGTGAGGGGGCTTTAGGACTAGCTATTTTAGTTTCTATAGTTCGAACTCATAATAATGATTATTTTCAAACATTTAATGTATTATGATAA
trnT	9696	9760	65	2			H	GTTTTAATAATTTATTTAAAATATCGGTCTTGTAAACCGAAAATAAGATTTATTCTTTTAAAACT
trnP	9761	9825	65				L	CAGAGAATAGTTTAATTAAAATATTAATTTTGGAGATTAATGATAGAGGTGTACTCTTTCTCTGA
nad6	9827	10327	501	1	ATT	TAA	H	ATTATATTATTAATAATTTTATCCTTCATTAACTCAATTACTTTAATTTGCTTAACACATCCCATATCAATAGGGGGTATTCTTCTAATCCAAACTATCGTAGTAACTTTAACAATTGGATTTTTTCATACCAATTTTTGATACTCTTATATTCTATTTCTTATTATAGTAAGAGGAATATTAGTTTTATTTGCTTACATAACAAGAGTAGCATCTAATGAAAAATTTATTCCATCAATTAAAATTTTCCTTATAATTATAAGTATCATTACTTTATCTATTTTCATAATAATAATAATAGACCCTTACTACTCTAATATAAATAATGTTTTCTTAGAAACAATAACTAATAACCCAACATATAATATTTCTATAACTAAATATTTTAACTATCCAAAT…
cyt b	10327	11469	1143	-1	ATG	TAG	H	ATGAAAATACCCTTACGAAAAATATCTCCTATATTAAAAATTATTAATAACTCTTTAATTGACTTACCTACACCATCTAATATTTCAACTTGATGAAATTTTGGATCTCTACTTGGATTATGCCTAATTATTCAAATTTTAACAGGAATCTTCCTTGCTATACATTTTACAGCCCACACTGACTATGCATTTAATAGAGTAATCCATATCTGTCGTGATGTAAACTATGGATGATTACTACGAGTAATCCATGCTAATGGGGCATCATTTTTCTTTATTTGTATCTATATGCATATTGGACGGGGAATTTACTATAGAAGATACAATCTTCATCTTACCTGATCAATTGGGATTATAATTTTATTTATAGTTATAGCAACAGCTTTTCTTGGATATGTT…
S_copy2	11468	11532	65	-2			H	AGTTAATGAACTTGTATAAGTGTATATTTTGAAAATATAAAAAAGAGTTTAACCTCTATTAACTT
nad1	11557	12501	945	24	ATT	TAA	L	ATTATCTTAAAAGATTTATTTTTATTATTTATTATTAGATTAGTATTGGTAGTTTGTGTTTTAGTTGGTGTAGCATTTTTGACTTTAATAGAACGGAAGGTTCTAGGTTATATTCAAATTCGGAAAGGTCCTAATAAAGTAGGGTTTATTGGAATTTTACAGCCTTTTAGAGATGCTATTAAGTTATTTACTAAGGAACAGACATATCCTTTAATATCTAATTTTTATATATATTATATAGCTCCTGTTTTTAATTTGTTTTTAAGGCTTTTATTATGATTATGTATACCTTTTTTAACTTTTATGTTTAATTTTAATTTAGGTATTTTATATTTTTTATGTTGTTCAAGGTTAGGTGTTTATACAATTATAGTTGCTGGTTGATCTTCTAATTCTAAT…
L_copy2	12503	12565	63	1			L	ATTACTTTGGCAGATTAGTGCTTTAAATTTAGAATTTAAATATGTATTTTAATACAAGTAATA
rrnL	12566	13846	1281				L	AATTAAATGATTATTTGTTACTTATAAAAAAAAGAATTTTTGTATAAGTATATTTTAGAAAATAATAAGTTAATTATAGTGAATAGTATAGTGATAGAATTTTGAATTATTTGTTAAGTTAATTATAAAAAAGAAGAATTTAATTTTTGTACCTTGTGTATCAGGGTTTATTAAAAAAAGTTAATTATTTAATTTTCTCGAATTAAAAAGAGCTATGATTATATAAATTTAAATGTTGCATAATTTTTTATAATATAATTATGGTAGTGAAACGTTAGTCGTTTTTTAATATATCTAGTTTCTTAAGAAATAAATTTAATTTAATTTTTTAATTATTTATTATTAATTATTTAGTAATGTGTATTAAGAATTAAATATTTTAAGGGATAAGCTTTAAAA…
trnV	13847	13916	70				L	CAAATTAGAGCTTGATATAAAGCATTTTATTTACATTAAAAAGTTAGTTGTGAGAATCAATTTAATTTGA
rrnS	13917	14700	784				L	TTATTCTGGCTTAAAATTTTAATTTATGAGCAAATTATATGCTAAGTTTATTGTTTTTGGAGTTTGTTATAGAGTAATAAATTATTGAATTTAATGTTAATTTATGCAATATAGAGAATTAAATATAAAAGAAATTTTGATTTAGGGATTCATAAAAGTATTGATAAAATTTGTGCCAGCAATTGCGGTTACACAGATAATGCGATTAAATTTTTTCAGTGAGTAATATATTTGTTTATTGATTATTTAAATTTAAATTTATTAGGTGAAATTAGTAAGTTTAATTTAAATTGTTTAAATAAGTAATAAGGTTATGAGGTTTTTGTATTAAACTAGGATTAGATACCCTATTATTGAAAATGCAAATTATTATGCTTGAGTAGTAGTAGTTATGTTCTT…
Overlap:	10	gap:	6

## Sheet: Xylotrupes gideon beckeri
Gene	Position		Size	Intergenic nucleotides	Codon
	From	To			Start	Stop	Strand	Sequence
trnQ	1	69	69				L	TATGATTTAGTATAGTATGTACATAGATTTTTGATATCTAAAGAAATAGTTTAAATCTGTTAATTATAA
trnI	133	196	64	63			H	AATGAAGTGTCTGAATAAAGAATTATTTTGATAGAATAAAACATGTGATTTTTCACCTTCATTA
trnM	197	265	69				H	AAAAAGATAAGCTAATAAAGCTACTGGGTTCATACCCCATCAATAAAGGTTCCAATCCTTTTCTTTTTA
nad2	266	1273	1008		ATT	TAA	H	ATTTATTATAAAATCCTATTTTATTTAACACTAATAATTGGAACTTTAATTTCAATTTCCTCTTATTCTTGAATAGGCATATGGATTGGATTAGAGATTAATCTTTTATCAATAATCCCCTTAATCAGTAAAATTAACAATATAATAGCATCTGAAGCTGCTTTAAAATATTTTATTACTCAAACATTAGCTTCTTCAATTTTATTACTTTCAATTATTATAATATCTATAAATAACATATACAATATAAATTCAATTTTATATTTTATAATAATTTTCAATACAGCTTTATTCACAAAAATAGGAGCTGCCCCATTTCACTTTTGATTCCCTGAARTTATAGAAGGATTAAATTGAACAAACTCATTAATTATACTAACATGACAAAAATTAGCTCCA…
trnW	1273	1338	66	-1			H	AAGGATTTAAGTTAAAAAAACTAAGAACCTTCAAAGTTCTAAATAAAGTAAGTACTTTAAGCCTTA
trnC	1331	1393	63	-8			L	AGTCTTATAGTCTAATAAGGATAATAAATTGCAAATTTATTGGTGAATTTTAATCTAAGGCTT
trnY	1394	1457	64				L	GATAAAGTGGCCGAGTTATAGGCGGTAAACTGTAAATTTACAAACGAATTCAATTCCTTTATCA
cox1	1459	2989	1531	1	ATT	T	H	ATTAAATGATTATTTTCTACAAACCATAAAGATATTGGAACTTTATATTTTTTATTTGGAAGATGATCAGGTATAGTAGGAACATCTCTTAGTTTATTAATTCGAGCAGAATTAGGGAATCCTGGTTCATTAATTGGAGATGACCAAATCTACAATGTCATTGTAACTGCTCATGCTTTTATTATAATTTTTTTTATAGTTATACCTATTATAATTGGAGGATTTGGAAATTGGTTAGTCCCTCTAATACTAGGGGCCCCTGATATAGCTTTTCCTCGTATAAATAATATAAGATTTTGACTTTTACCTCCTTCATTAACTTTACTTTTAGCTAGAAGAATAGTAGAAAATGGTGCAGGAACTGGGTGAACAGTATACCCTCCTTTATCAGCTAATATT…
trnL	2990	3055	66				L	TTCTAAAAAAAGGTATAACCTTTATATATGGAGTTTAAGACCATTGCACTAATCTGCCATATTAGA
cox2	3056	3743	688		ATT	T	H	ATTGCAACATGAAATATATTAATACTTCAAGATAGGGCCTCCCCATTAATAGAACAGTTAACCTTTTTTCATAACCATGCTTTAATAATTTTATTAATAATTACAGTATTAGTAGGTTATATAATAGTAACTTTATTTTTTAATCAATTTAATAACCGATTTTTATTGGAAGGACAAACAATTGAAATTATTTGAACTACTCTACCAGCGATTACTTTAATTTTTATTGCTTTACCTTCCTTACGACTTCTATATCTTCTTGATGAAATCAATAACCCTTTAGTTTCTATTAAAGCTATCGGACATCAATGATACTGATCTTATGAATATGGAGATTTTATAAATTTTGAATTTGATTCTTATATAATTCCTTCACTATCTATACCTATTGAAAATTTC…
trnK	3744	3814	71				H	CATTAGATGGCTGAAAGTAAGCAATGGTCTCTTAAACCAGTCTATAGTAGATTCACGACTACTTCTAATGA
trnD	3815	3880	66				H	AAAAATTTAGTTAATCTTCTATAACATTAACTTGTCAAGTTAAAATAATCTAAAAGATAATTTTTA
atp8	3881	4036	156		ATT	TAA	H	ATTCCACAAATAGCACCATTAAGTTGACTTATATTATTTTTTCTATTTGTTACAATTTTTTTTCTATTTAATATTATAAACTATTTTACTTTTCAATATCCAGTAAGTTTCAAGACAAAAAAAGGAACAATAAAAAAAATTAACTGAAAATGATAA
atp6	4030	4701	672	-7	ATG	TAA	H	ATGATAACAAATTTATTTTCTTCTTTTGACCCAACAACATCTTTTAACTTATCTTTAAATTGAATAAGAACATTTCTTGGACTTTTACTAATCCCTTCTTCATACTGATTAATCCCATCCCGTTATAACTTTATTTGAATTAAAATTATTTCTACATTACACAATGAATTTAAGGTTTTAATTGGGCCTAAAATTAAAGGAAGAACATTAATTTTTATCTCTCTATTTTCTATAATTTTATTTAATAATTTTTTAGGGTTATTCCCTTATATTTTTACAAGAACTAGCCATATAGTATTAACATTAACCTTAGCTCTCCCATTATGATTAAGATTTATAATTTATGGATGAATTAATCATACAATACATATATTTGCTCATCTTGTACCTCAAGGTACA…
cox3	4701	5487	787	-1	ATG	T	H	ATGTCAAGACATAAAAACCATCCATACCATCTTGTTGACCCTAGCCCTTGACCTATTTTAGGCGCATTTAGAGCAATGATTACATTAGTAGGAATTATTAAATGATTTCATTTTTATAATAATTCCTTATTTTTATTAGGAAGATTAATTACTATACTAATTATATATCAATGATGACGAGATATTGTCCGTGAAGGGACTTTCCAAGGCTTACATACATACCCAGTTACTATAGGTCTACGATGAGGAATAATTCTATTTATTACTTCAGAAGTTTTCTTTTTTATTTCTTTTTTCTGAGCCTTTTTTCATAGAAGACTTGCCCCTACTATTGAATTAGGAATAAACTGACCACCAAAAGGAATTACTCCATTTAATCCCCTTCAAATCCCATTACTT…
trnG	5488	5550	63				H	ATTTATATAGTATAATAATTATATTTGACTTCCAATCAAAAGATCTAATAATTAGTATAAATA
nad3	5551	5904	354		ATC	TAG	H	ATCATAATCATTTTTTATATTAGACTTATCATTTTTACTATTTCCTTTATTATAATTATAATTTCATTTATAATTTCTAAAAAAAGATTCATAGACCGGGAAAAAGCCTCTCCATTCGAATGTGGATTTGACCCAAAAAGATCAGCTCGTATGCCTTTTTCTATTCAATTTTTTTTAATTGCAGTAATCTTTTTAATTTTTGATGTTGAAATTGYTTTATTAATCCCAATTATTCTAATTATAAAAATAACTAATATTTTAATATATTTTATTATTACATTATTTTTTTTAAGAGTATTATTAATTGGCCTTTACCATGAATGAAATCAAGGAGCATTAACTTGAACTATTTAG
trnA	5903	5968	66	-2			H	AGGGTTATAGTTAAGTATAACATTTAATTTGCATTTAAAAAGTATTGATTTAATCAATTTACCTTA
trnR	5969	6034	66				H	AAATAAGAAACAAAAAATTGTATTTAGTTTCGACCTAAAATTTTGATGGTTAATCATCCTTATTTA
trnN	6035	6100	66				H	TTAATTGAAACCAAAATAGAGGTATATCACTGTTAATGATAAAACTGAGAAAATTCTCCAATTAAG
trnS	6101	6167	67				H	GAAGTATGAAATTCAAGAATAAGCTTCTAACTTAATTCTTTAGCAGTGAAACTCTGTTAATATTTCT
trnE	6168	6231	64				H	ATTTATATAGTTTAATAAAAACATTATATTTTCAATATAAAATTAGAGGCTTTTCTTATAAATA
trnF	6230	6295	66	-2			L	ATTTAAATAGCTTATATTTAGAGCAAGATATTGAAGATATCTAGGAAGTATTATTACTTTTAAATA
nad5	6296	8009	1714		ATT	T	L	ATTTGTTTAATTTATTTTATTAGGTTTTTATTTTTTAGAATTGTATTTTTTTTGTTAAGATTGAATTTTATAGTCATAGATTATAGTTTATTATTAGAGTATGAGGTATTAAACATTAATTCTTGTGGTATTATAATAACTATTTTATTAGATTGAATATCTTTATTATTTATAAGATTTGTATTATTTATTTCATCAATAGTAATTTATTATAGAGAAGAATATATAGAAGGTGATATTTTTATTAATCGTTTTATTATATTAGTTTCTATATTTGTTTTATCAATAATGTTATTGATTATTAGTCCTAATTTAATTAGAATTTTATTAGGTTGAGATGGTCTGGGCCTTGTTTCTTATTGTTTAGTAATTTATTACCAGAATGTGAAATCTTATAAT…
trnH	8010	8073	64				L	ATTTAAATAGTTTAATTAAAATATTGATTTGTGGTATCAAGGATGTAATTTATTACTTTAAATT
nad4	8073	9410	1338	-1	ATG	TAA	L	ATGATAAAATTTTTATTGGCTTTAATTTTTATAGTTCCTATAAGATTTATAAAGTATAGATTTTGATTAAATCAATATTTTTATTTTTTACTTACTTTTTTATATGGGTTTATACTTGTATTTAATTATCAATTTTCCTATATTTCTTATTTTATAGGTTGTGATTTGTTATCTTTTATAATAGTTTTATTAAGATTTTGAATTTGTTCTTTAATAATTTTAGCTTCACAAAAAATTTATATAACTAATTATTTTTATAATGTTTTTATATTTGTTATGATTATGTTATTATTATCTTTGTATATAACTTTTAGGTCTATGAATTTATTTATATTTTATTTATTTTTTGAAGTAAGATTAATTCCTACTTTAATTTTAATTGTAGGCTGAGGCTATCAG…
nad4L	9404	9694	291	-7	ATG	TAA	L	ATGGTAGTTTTTTGTTTATTTTTTTCTTTATTTATATATTTTATAGGGTTAATGTCTTTTTGTGTAAAACGTAAGCATTTACTATTAATATTATTAAGATTAGAGTTTGTAATGTTATCATTATACTTTAATTTGTATTTGTATTTAATGTATTTTAATTATGAGTTTTATTTTAGAATGATTTTTATTAGAATAAGAGTATGTGAGGGGGCTTTAGGGTTAGCCATTTTAGTTTCTATAGTTCGAACTCATAATAATGATTATTTTCAAACATTTAATGTATTATGATAA
trnT	9697	9761	65	2			H	GTTTTAATAATTTATTTAAAATATCGGTCTTGTAAACCGAAAATAAGATTTATTCTTTTAAAACT
trnP	9762	9826	65				L	CAGAGAATAGTTTAATTAAAATATTAATTTTGGAGATTAATGATAGAGGTACACTCTTTCTCTGA
nad6	9828	10328	501	1	ATT	TAA	H	ATTATATTATTAATAATTTTATCCTTCATTAATTCAATTACTTTAATTTGCTTAACACATCCTATATCAATAGGGGGCATTCTTCTAATTCAAACTATTGTAGTAACTTTAACAATTGGATTTTTTCATACCAATTTTTGATACTCTTATATTCTATTTCTTATTATAGTAAGAGGAATGCTAGTTTTATTTGCTTATATAACAAGAGTAGCATCTAATGAAAAATTTATCCCATCAATTAAAATTTTCCTTATAATTATAAGTATCATTACTTTATCCATTTTCATAATAATAATAATAGATCCTTATTACTCTAATATAAATAATGTTTTCTTAGAAACAATAACTAATAACTCAACATATAATATCTCTATAACCAAATATTTTAACTATCCAAAT…
cyt b	10328	11470	1143	-1	ATG	TAG	H	ATGAAAATACCCTTACGAAAAATATCTCCTATATTAAAAATTATTAATAACTCTTTAATCGACTTACCTACACCATCTAATATCTCAACTTGATGAAATTTTGGGTCTCTACTTGGATTATGTCTAATCATTCAAATTTTAACAGGAATCTTCCTTGCTATACATTTTACAGCCCACACTGACTATGCATTTAATAGAGTAATTCATATCTGCCGTGATGTAAACTATGGGTGATTACTACGAGTAATTCATGCTAACGGAGCATCATTTTTCTTTATTTGTATCTACATACATATTGGACGAGGAATTTACTATAGAAGATACAATCTTCATCTTACCTGATCAATTGGAATTATAATTTTATTTATAGTGATAGCAACAGCTTTTCTTGGATATGTT…
S_copy2	11469	11533	65	-2			H	AGTTAATGAACTTGTATAAGTGTATATTTTGAAAATATAAAAAAGAGTTTAACCTCTATTAACTT
nad1	11558	12502	945	24	ATT	TAA	L	ATTATCTTAAAAGATTTATTTTTATTATTTATTGTTAGATTGGTATTGGTAGTTTGTGTTTTAGTTGGTGTAGCATTTTTGACTTTGATAGAGCGAAAGGTTTTAGGTTATATTCAAATTCGAAAAGGTCCTAATAAAGTAGGTTTTATTGGAATTTTGCAGCCTTTTAGAGATGCTATTAAGTTATTTACTAAGGAACAGACATATCCTTTAATATCTAACTTTTATTTATATTATATGGCTCCTGTTTTTAATTTGTTTTTAAGTCTTTTATTATGATTATGTATACCTTTTTTAACTTTTATGTTTAATTTTAATTTAGGTATTTTATATTTTTTATGTTGTTCAAGGTTAGGTGTTTATACAATTATGGTTGCTGGTTGGTCTTCTAATTCTAAT…
L_copy2	12504	12566	63	1			L	ATTACTTTGGCAGATTAGTGCTTTAAATTTAGAATTTAAATATGTATTTTAATACAAGTAATA
rrnL	12567	13847	1281				L	AATTAAATGATTATTTATTATTTATAAAAAAAAGAATTTTTATATAAGTATATTTTAGAAAATAATAAGTTAATTATAGTGAATAGTATAGTGATAGAATTTTGAATTATTTATTAAGTTAATTATAAAAAAGAAGAATTTAATTTTTGTACCTTGTGTATCAGGGTTTATTAAAAAAAGTTAATTATTTAATTTTCTCGAATTAAAAAGAGCTATGATTATATAAATTTAAATGTTGCATAATTTTTTATAATATAATTATGGTAGTGAAACGTTAGTCGTTTTTTAAGATATCTAGTTTCTTAAGAAATAAATTTAATTTAATTTTTTAATTACTTATTATTAATTATTTAGTAATGTGTATTAAGAATTAAATATTTTAAGGGATAAGCTTTAAAA…
trnV	13848	13917	70				L	CAAATTAGAGCTTGATATAAAGCATTTTATTTACATTAAAAAGTTAGTTGTGAGAATCAATTTAATTTGA
rrnS	13918	14702	785				L	TTTATTCTGGCTTAAAATTTTAATTTATGAGCAAATTATATGCTAAGTTTATTGTTTTTGGAGTTTGTTATAGAGTAATAAATTATCAAATTTAATGTTAATTTATGCAATATAGAGAATTAAATATAAAAGAAATTTTGATTTAGGGATTCATAAAAGTATTGATAAAATTTGTGCCAGCAATTGCGGTTACACAGATAATGCGATTAAATTTTTTCAGTGAGTAATATATTTGTTTATTGATTATTTAAATTTAAATTTATTAGGTGAAATTAGTAAGTTTAATTTAAATTGTTTAAATAAGTAATAAGGTTATGAGGTTTTTGTATTAAACTAGGATTAGATACCCTATTATTGAAAATGCAAATTATTATGCTTGAGTAGTAGTAGTTATGTTCT…
Overlap:	10	gap:	6

## Sheet: Xylotrupes gideon siamensis
Gene	Position		Size	Intergenic nucleotides	Codon
	From	To			Start	Stop	Strand	Sequence
trnQ	1	69	69				L	TATAATTTAGTATAGTATGTACATAGATTTTTGATATCTAAAGAAATAGTTTAAATCTGTTAATTATAA
trnI	133	196	64	63			H	AATGAAGTGTCTGAATAAAGAATTATTTTGATAGAATAAAACATGTGATTTTTCACCTTCATTA
trnM	198	266	69	1			H	AAAAAGATAAGCTAATAAAGCTACTGGGTTCATACCCCATCAATAAAGGTCCCAATCCTTTTCTTTTTA
nad2	267	1274	1008		ATT	TAA	H	ATTTATTATAAAATCCTATTTTATTTAACACTTAGAATTGGTACTTTAATTTCAATTTCATCCTACTCTTGAATAGGAATATGAATTGGATTAGAAATTAATCTCTTATCTATAATCCCATTAATTAGTAAAATTAACAATATAATAGCGTCAGAAGCTGCATTAAAATATTTTATCACTCAAACATTAGCCTCTTCAATTTTATTACTTTCAATTATTATAATATCAATAAATAATATATACAATATAAATTCAATTCTATACTTTACAATAATTTTTAATACAGCTTTATTTACAAAAATAGGAGCAGCCCCATTCCATTTCTGATTTCCTGAAGTTATAGAAGGACTAAATTGAACAAACTCATTAATTATATTAACATGACAAAAATTAGCCCCA…
trnW	1274	1339	66	-1			H	AAGGATTTAAGTTAAAAAAACTAAGAACCTTCAAAGTTCTAAATAAAGTAAGTACTTTAAGCCTTA
trnC	1332	1394	63	-8			L	AGTCTTATAGTCTAATAAGGATAATAAATTGCAAATTTATTGGTGAATTTTAATCTAAGGCTT
trnY	1395	1458	64				L	GATAAAGTGGCCGAGTAATAGGCGGTAAACTGTAAATTTACAAACGAATTCTATTCCTTTATCA
cox1	1460	2990	1531	1	ATT	T	H	ATTAAATGATTATTTTCTACAAACCATAAAGATATTGGAACTTTATACTTTTTATTCGGGAGATGATCAGGTATAGTAGGAACATCTCTTAGTTTACTAATTCGAGCAGAATTAGGAAACCCTGGTTCATTAATTGGAGATGACCAAATTTATAATGTTATTGTAACTGCTCATGCTTTTATTATAATTTTCTTTATAGTTATACCTATTATAATCGGAGGATTTGGAAATTGATTAGTTCCTTTAATACTAGGAGCTCCAGATATAGCATTTCCTCGTATAAATAATATAAGATTTTGGCTTTTACCTCCTTCATTAACCTTACTTTTAGCTAGAAGAATAGTAGAAAATGGGGCAGGAACTGGGTGAACAGTATATCCTCCACTATCAGCTAATATT…
trnL	2991	3056	66				H	TCTAATATGGCAGATTAGTGCAATGGTCTTAAACTCCATATATAAAGGTTACACCTTTTTTTAGAA
cox2	3057	3744	688		ATT	T	H	ATTGCAACATGAAATATATTAATACTTCAAGATAGAGCCTCCCCATTAATAGAGCAATTAACTTTTTTTCATAATCATGCTCTAATAATTTTACTGATAATTACAGTATTAGTAGGTTATATAATAGTAACTTTATTTTTTAATCAATTTAATAATCGATTTTTATTAGAAGGACAAACAATCGAAATTATTTGAACTACTCTACCAGCAATTACTTTAATTTTTATTGCTTTACCCTCTTTACGACTTTTATATCTTCTTGATGAAATCAATAACCCTTTAGTTTCTATTAAAGCTATCGGGCATCAATGATATTGATCTTATGAATATGGAGATTTTATAAATTTTGAATTTGATTCTTATATAGTCCCTTCTGCATCTATACCTGTAGAAAATTTC…
trnK	3745	3815	71				H	CATTAGATGGCTGAAAGTAAGCAATGGTCTCTTAAACCACTATATAGTAGATTCACAACTACTTCTAATGG
trnD	3816	3878	63				H	AAAAATTTAGTTAATATATAACATTAACTTGTCAAGTTAAAATAATCTAAAAGATAATTTTTA
atp8	3879	4034	156		ATC	TAA	H	ATCCCACAAATAGCACCATTAAGTTGACTTATATTATTTTTCATATTTATTATAATTTTTTTTCTATTTAATATCATAAACTATTTTACTTTTCAATATCCAACAAGGTTTAAAACAAAAAAAAGAACAATTAAAAAAATTAACTGAAAATGATAA
atp6	4028	4699	672	-7	ATG	TAA	H	ATGATAACAAATTTATTTTCTTCTTTTGACCCAACAACATCTTTTAATTTATCTTTAAATTGAATAAGAACATTCCTTGGACTTTTACTAATCCCTTCTTCCTACTGACTAATYCCATCCCGTTATAATTTTATTTGAATTAAAATTATTTCAACACTGCATAATGAATTTAAAGTTTTAATTGGACCTAAAATTAAAGGAAGAACATTAATTTTCATTTCACTATTCTCTATAATCTTATTTAATAATTTTTTAGGTTTATTCCCTTATATTTTTACAAGAACTAGTCATATAGTATTAACATTAACTTTAGCTCTCCCATTATGATTAAGATTTATAATTTATGGCTGAATTAATCACACAATACATATATTTGCTCATCTTGTGCCTCAAGGTACA…
cox3	4699	5485	787	-1	ATG	T	H	ATGTCAAGACATAAAAATCATCCATACCATCTTGTTGACCCTAGCCCTTGACCTATTTTAGGTGCATTTAGAGCTATAATTACATTAGTAGGAATTATTAAATGATTTCATTTTTATAATAATTCTTTATTTCTATTAGGAAGATTAATTACTATACTAATTATATATCAATGATGACGAGACATTGTTCGTGAAGGAACTTTTCAAGGTTTACATACATATCCAGTTACTATAGGACTACGATGAGGAATAATTCTATTTATTACTTCAGAAGTTTTCTTTTTTATCTCTTTTTTCTGAGCTTTCTTTCATAGAAGTCTAGCCCCTACTATCGAATTAGGAATAAATTGACCCCCTAAGGGAATCACCCCATTTAACCCCCTCCAAATTCCATTACTT…
trnG	5486	5548	63				H	ATTTATATAGTATAATAATTATATTTGACTTCCAATCAAAAGATCTAATAATTAGTATAAATA
nad3	5549	5902	354		ATC	TAG	H	ATCATAATCATTTTTTATATTAGAATTATTATTTTCATCATTTCCTTTATTATAATTATAATTTCATTTACAATCTCTAAGAAAAGATTTATAGACCGAGAAAAGGCTTCCCCATTTGAATGTGGATTTGACCCTAAAAGATCTGCTCGTATACCTTTTTCTATTCAATTTTTTTTAATTGCAGTAATCTTTTTAATTTTTGATGTTGAAATTGCCTTATTAATCCCAATTATCTTAATTATAAAAATAACTAATATCTTAATGTATTTTATTATTACATTATTTTTTCTAGTAGTATTATTAATTGGTCTTTATCATGAATGAAACCAAGGAGCACTAACTTGAACTATTTAG
trnA	5901	5966	66	-2			H	AGGGTTATAGTTAARTATAACATTTAATTTGCATTTAAAAAGTATTGATTTAATCAATTTACCTTA
trnR	5967	6032	66				H	AAATAAGAAACAAAATATTGTATTTAGTTTCGACCTAAAATTTTGGTGTTTAATCACCCTTATTTA
trnN	6033	6098	66				H	TTAATTGAAACCAAAATAGAGGTATATCACTGTTAATGATAAAACTGAGAAAACTCTCCAATTAAG
trnS	6099	6165	67				H	GAAATATGAAATTCAAGAATAAGCTTCTAACTTAATTCTTTAGCAGTGAAACTCTGTTAATATTTCT
trnE	6166	6229	64				H	ATTTATATAGTTTAATAAAAACATTATATTTTCAATATAAAATTAGAAATTTTTCTTATAAATA
trnF	6228	6293	66	-2			L	ATTTAAATAGCTTATATTTAGAGCAAGATATTGAAGATATCTAGGAAGTATTATTACTTTTAAATA
nad5	6294	8007	1714		ATT	T	L	ATTTGTTTAATTTATTTTGTTAGGTTTTTATTTTTTAGAGTTTTATTTTTTTTGTTAAGGTTAAATTTTATAGTCACAGATTATAGGCTATTATTAGAATACGAAGTATTAAATATTAATTCTTGTGGAATTATAATAACTATTTTATTAGATTGAATATCTTTATTATTTATAAGATTTGTATTATTTATTTCATCAATAGTAATTTATTATAGAGAAGAATACATAGAAGGTGATATTTTTATTAATCGTTTTATTATATTAGTTTCTATATTCGTATTGTCTATAATATTATTAATTATTAGTCCTAATTTAATTAGAATTTTATTAGGTTGAGATGGATTAGGGCTTGTTTCTTATTGTTTAGTGATTTATTATCAGAATGTAAAATCTTATAAT…
trnH	8008	8071	64				L	ATTTAAATAGTTTAATTAAAATATTGATTTGTGGTATCAATGATGTAATTTATTACTTTAAATT
nad4	8071	9408	1338	-1	ATG	TAA	L	ATGATAAAATTTTTATTGGCTTTAATTTTTATAGTTCCTATAAGATTTATAAAACATAGATTTTGATTAAATCAATATTTTTATTTTTTAATTACTTTTTTATATGGGTTTATATTTGTATTTAATTTTCAATTTTCTTACATTTCTTATTTTATGGGTTGTGATTTATTATCTTTTATGATAGTTTTATTAAGATTTTGAATTTGTTCTTTAATAATTTTAGCCTCTCAAAAAATTTATATAACTAATTATTTTTATAATATTTTTATATTTGTTATAATTATATTATTATTATCTTTATATATAACTTTTAGGTCTATAAATTTATTTATATTTTATTTATTTTTTGAAGTTAGATTAATTCCCACTTTAATTTTAATTGTAGGTTGAGGGTATCAA…
nad4L	9402	9692	291	-7	ATG	TAA	L	ATGGTAGTTTTTTGTTTATTTTTTTCTTTATTTATGTATTTTATAGGGTTAATATCTTTTTGTATAAAACGTAAGCATTTATTATTAATATTATTAAGATTAGAATTTGTAATATTATCATTATATTTCAATTTATATTTATATTTAATATATTTTAATTATGAATTTTATTTTAGAATAATTTTTGTTAGAATAAGAGTATGTGAGGGGGCTTTAGGGTTGGCTATTTTAGTTTCTATAGTTCGAACTCATAATAATGATTATTTTCAAACATTTAATGTATTATGATAA
trnT	9695	9759	65	2			H	GTTTTAATAATTTATTTAAAATACTGGTCTTGTAAACCGGAAATAAGATTTATTCTTTTAAAACT
trnP	9760	9824	65				L	CAGAGAGTAGTTTAATTAAAATATTAATTTTGGAGATTAATGATAGAGGTATACTCTTTCTCTGA
nad6	9826	10326	501	1	ATT	TAA	H	ATTATATTATTAATAACTTTATCTTTAATTAATTCAATTACTTTAATTTGCTTAACACACCCTATATCTATAGGAGGTGTCCTTTTAATTCAAACTATTGTTGTAACTTTAACAATTGGATTTTTTCACACTAATTTTTGATACTCTTATATTCTCTTTCTTATTATAGTAAGAGGTATRCTAGTTTTATTTGCCTATATAACAAGAGTAGCATCCAATGAAAAATTTATACCATCAATTAAAATTTTCCTTATAATTATAAGTATTATTACCATATTTATTTTTATAATAATAATAGCAGATCCTTATTATTCTAATATAAATAATATTTTCTTAGAAACAATAACTAACACTTCAACATATAATATTTCTATAACTAAATATTTTAATTATCCAAAT…
cyt b	10326	11468	1143	-1	ATG	TAG	H	ATGAAAACACCCTTACGAAAAATATCTCCTATATTAAAAATCATTAACAATTCTTTAATTGATTTACCTACACCATCTAATATTTCAACTTGATGAAATTTTGGCTCTCTTCTTGGACTATGTTTAATTATTCAAATTTTAACAGGAATTTTTCTTGCTATACATTTTACTGCACATACTGATTATGCATTTAACAGAGTAATTCATATTTGTCGTGATGTAAACTATGGATGACTACTACGAGTAATTCATGCTAATGGAGCATCATTTTTTTTTATTTGTATTTATATACATATCGGCCGAGGAATTTACTATAGAAGATACAATCTTCATCTTACCTGATCAATTGGAATTATAATTTTATTTATAGTTATAGCAACAGCTTTCCTAGGATATGTT…
S_copy2	11467	11531	65	-2			H	AGTTAATGAACTTGTATAAGTGTATATTTTGAAAATATAAAAAAGAGTTTAACCTCTATTAACTT
nad1	11556	12500	945	24	ATT	TAA	L	ATTATTTTAAAAGATTTATTTTTATTATTTATTATTAGGTTAGTGTTAGTAGTTTGTGTATTAGTTGGTGTTGCATTTTTAACTTTAATAGAGCGAAAGGTTTTAGGTTATATTCAGATTCGTAAGGGACCTAATAAAGTAGGTTTTATAGGGATTTTACAACCTTTTAGTGATGCTATTAAGTTATTTACTAAGGAACAGACATATCCTTTAATGTCTAATTTTTATATATATTATATAGCTCCTGTTTTTAATTTGTTTTTAAGACTTTTATTATGATTATGTATGCCTTTTTTAACTTTTATGTTTAATTTTAATTTAGGTATTTTATATTTTTTATGTTGTTCAAGATTAGGTGTTTATACAATTATAGTTGCTGGTTGATCTTCTAATTCTAAT…
L_copy2	12502	12564	63	1			H	TATTACTTGTATTAAAATACATATTTAAATTCTAAATTTAAAGCACTAATCTGCCAAAGTAAT
rrnL	12565	13845	1281				L	AATTAAATGATTATTTGTTATTTATAAAAAAAAGAATTTTTATATAAGTATATTTTAGAAAATAAGAGGATAATTATAGTGAATAGTATAGTGATAGAATTTTGAATTATTTTTAAAGTTAATTATAAAAAAGAAGAATTTAATTTTTGTACCTTGTGTATCAGGGTTTATTAAAAAAAGTTAATTATTTAATTTTCTCGAATTAAAAAGAGCTATAACTATATAAATTTAAATGTTGCATAATTTTTTATAATATAGTTATAGTAATGAAACGTTAGTCGTTTTTTAATATATCTAGTTTCTTAAGAAATAAATTTAATTTAATTTTTTAATTATTTATTATTAATTGTTTAGTGGTATGTATTAAGAATTAAATATTTTAAGGGATAAGCTTTAAAA…
trnV	13846	13915	70				L	CAAATTAGAGCTTGATATAAAGCATTTTATTTACATTAAAAAGTTAGTTGTGAGAATCAATTTAATTTGA
rrnS	13917	14700	784	1			L	TATTCTGGCTTAAAATTTTAATTTATGGGTAAATTATATGCTAAGTTTATTGTTTTTGGGATTTATTATAGAGTAATAAATTATGAAATTTAATTTGTTAATTTATGCAATATAGAGAATTAAATATAAAAGAAATTTTGATTTAGGGATTCATAAGAGTATTGATAAAATTTGTGCCAGCAATTGCGGTTACACAGATAATGCAATTAAATTTTTTCAGTAAGTAATATATTTGTTTATTAATTATTTAGATTTAAGTTTATTAGGTGAAATTAGTAAGTTTAATTTAAATTGTTTAAATAAATAATAAGGTTATGAGGTTTTTGTATTAAACTAGGATTAGATACCCTATTATTGAAAATGCAAATTATTATGCTAGAGTAGTAGTAGTTATGTTCT…
Overlap:	10	gap:	8

## Sheet: Xylotrupes gideon sumatrensis
Gene	Position		Size	Intergenic nucleotides	Codon
	From	To			Start	Stop	Strand	Sequence
trnQ	1	69	69				L	TATGATTTAGTATAGTATGTACATAGATTTTTGATATCTAAAGAAATAGTTTAAATCTGTTAATTATAA
trnI	133	196	64	63			H	AATGAAGTGTCTGAATAAAGAATTATTTTGATAGAATAAAACATGTGATTTTTCACCTTCATTA
trnM	197	265	69				H	AAAAAGATAAGCTAATAAAGCTACTGGGTTCATACCCCATCAATAAAGGTTCCAATCCTTTTCTTTTTA
nad2	266	1273	1008		ATT	TAA	H	ATTTATTATAAAATCCTATTTTATTTAACACTAATAATTGGAACTTTAATTTCAATTTCCTCTTATTCTTGAATAGGCATATGAATTGGATTAGAGATTAATCTTTTATCAATAATCCCCTTAATCAGTAAAATTAACAATATAATAGCATCTGAAGCTGCTTTAAAATATTTTATTACTCAAACATTAGCTTCTTCAATTTTATTACTTTCAATTATTATAATATCTATAAATAACATATACAATATAAATTCAATTTTATATTTTATAATAATTTTCAATACAGCTTTATTCACAAAAATAGGAGCTGCCCCATTTCACTTTTGATTCCCTGAAGTTATAGAAGGATTAAATTGAACAAACTCATTAATTATACTAACATGACAAAAATTAGCTCCA…
trnW	1273	1338	66	-1			H	AAGGATTTAAGTTAAAAAAACTAAGAACCTTCAAAGTTCTAAATAAAGTAAGTACTTTAAGCCTTA
trnC	1331	1393	63	-8			L	AGTCTTATAGTCTAATAAGGATAATAAATTGCAAATTTATTGGTGAATTTTAATCTAAGGCTT
trnY	1394	1457	64				L	GATAAAGTGGCCGAGTTATAGGCGGTAAACTGTAAATTTACAAACGAATTCAATTCCTTTATCA
cox1	1459	2989	1531	1	ATT	T	H	ATTAAATGATTATTTTCTACAAACCATAAAGATATTGGAACTTTATATTTTTTATTTGGAAGATGATCAGGTATAGTAGGAACATCTCTTAGTTTATTAATTCGAGCAGAATTAGGGAATCCTGGTTCATTAATTGGAGATGACCAAATCTACAATGTCATTGTAACTGCTCATGCTTTTATTATAATTTTTTTTATAGTTATACCTATTATAATTGGAGGATTTGGAAATTGGTTAGTCCCTCTAATACTAGGGGCCCCTGATATAGCTTTTCCTCGTATAAATAATATAAGATTTTGACTTTTACCTCCTTCATTAACTTTACTTTTAGCTAGAAGAATAGTAGAAAATGGTGCAGGAACTGGGTGAACAGTATACCCTCCTTTATCAGCTAATATT…
trnL	2990	3055	66				H	TCTAATATGGCAGATTAGTGCAATGGTCTTAAACTCCATATATAAAGGTTATACCTTTTTTTAGAA
cox2	3056	3743	688		ATT	T	H	ATTGCAACATGAAATATATTAATACTTCAAGATAGGGCCTCCCCATTAATAGAACAGTTAACCTTTTTTCATAACCATGCTTTAATAATTTTATTAATAATTACAGTATTAGTAGGTTATATAATAGTAACTTTATTTTTTAATCAATTTAATAACCGATTTTTATTGGAAGGACAAACAATTGAAATTATTTGAACTACCCTACCAGCGATTACTTTAATTTTTATTGCTTTACCTTCCTTACGACTTCTATATCTTCTTGATGAAATCAATAACCCTTTAGTTTCTATTAAAGCTATCGGGCATCAATGATACTGATCTTATGAATATGGAGATTTTATAAATTTTGAATTTGATTCTTATATAATTCCTTCACTATCTATACCTATTGAAAATTTC…
trnK	3744	3814	71				H	CATTAGATGGCTGAAAGTAAGCAATGGTCTCTTAAACCAATCTATAGTAGATTCACGACTACTTCTAATGA
trnD	3815	3880	66				H	AAAAATTTAGTTAATCTTCTATAACATTAACTTGTCAAGTTAAAATAATCTAAAAGATAATTTTTA
atp8	3881	4036	156		ATT	TAA	H	ATTCCACAAATAGCACCATTAAGTTGACTTATATTATTTTTTCTATTTGTTACAATTTTTTTTCTATTTAATATTATAAACTATTTTACTTTTCAATATCCAGTAAGTTTCAAGACAAAAAAAGGAACAATAAAAAAAATTAACTGAAAATGATAA
atp6	4030	4701	672	-7	ATG	TAA	H	ATGATAACAAATTTATTTTCTTCTTTTGACCCAACAACATCTTTTAACTTATCTTTAAATTGAATAAGAACATTTCTTGGACTTTTACTAATCCCTTCTTCATACTGATTAATCCCATCCCGTTATAACTTTATTTGAATTAAAATTATTTCTACATTACACAATGAATTTAAGGTTTTAATTGGACCTAAAATTAAAGGAAGAACATTAATTTTTATCTCTCTATTCTCTATAATTTTATTTAATAATTTTTTAGGGTTATTCCCTTATATTTTTACAAGAACTAGCCATATAGTATTAACATTAACCTTAGCTCTCCCATTATGATTAAGATTTATAATTTATGGATGAATTAATCATACAATACATATATTTGCTCATCTTGTACCCCAAGGTACA…
cox3	4701	5487	787	-1	ATG	T	H	ATGTCAAGACATAAAAACCATCCATACCATCTTGTTGACCCTAGCCCTTGACCTATTTTAGGCGCATTTAGAGCAATGATTACATTAGTAGGAATTATTAAATGATTTCATTTTTATAATAATTCCTTATTTTTATTAGGAAGATTAATTACTATACTAATTATATATCAATGATGACGAGATATTGTCCGTGAAGGGACTTTCCAAGGCTTACATACATACCCAGTTACTATAGGTCTACGATGAGGAATAATTCTATTTATTACTTCAGAAGTTTTCTTTTTTATTTCTTTTTTCTGAGCCTTTTTTCATAGAAGACTTGCCCCTACTATTGAATTAGGAATAAACTGACCACCAAAAGGAATTACTCCATTTAATCCCCTTCAAATCCCATTACTT…
trnG	5488	5550	63				H	ATTTATATAGTATAATAATTATATTTGACTTCCAATCAAAAGATCTAATAATTAGTATAAATA
nad3	5551	5904	354		ATC	TAG	H	ATCATAATCATTTTTTATATTAGACTTATCATTTTTACTATTTCCTTTATTATAATTATAATTTCATTTATAATTTCTAAAAAAAGATTCATAGACCGGGAAAAAGCCTCTCCATTCGAATGTGGATTTGACCCAAAAAGATCAGCTCGTATGCCTTTTTCTATTCAATTTTTTTTAATTGCAGTAATCTTTTTAATTTTTGATGTTGAAATTGCTTTATTAATCCCAATTATTCTAATTATAAAAATAACTAATATTTTAATATATTTTATTATTACATTATTTTTTTTAAGAGTATTATTAATTGGCCTTTACCATGAATGAAATCAAGGAGCATTAACTTGAACTATTTAG
trnA	5903	5968	66	-2			H	AGGGTTATAGTTAAGTATAACATTTAATTTGCATTTAAAAAGTATTGATTTAATCAATTTACCTTA
trnR	5969	6034	66				H	AAATAAGAAACAAAAAATTGTATTTAGTTTCGACCTAAAATTTTGATGGTTAATCATCCTTATTTA
trnN	6035	6100	66				H	TTAATTGAAACCAAAATAGAGGTATATCACTGTTAATGATAAAACTGAGAAAATTCTCCAATTAAG
trnS	6101	6167	67				H	GAAATATGAAATTCAAGAATAAGCTTCTAACTTAATTCTTTAGCAGTGAAACTCTGTTAATATTTCT
trnE	6168	6231	64				H	ATTTATATAGTTTAATAAAAACATTATATTTTCAATATAAAATTAGAGGCTTTTCTTATAAATA
trnF	6230	6295	66	-2			L	ATTTAAATAGCTTATATTTAGAGCAAGATATTGAAGATATCTAGGAAGTATTATTACTTTTAAATA
nad5	6296	8009	1714		ATT	T	L	ATTTGTTTAATTTATTTTATTAGGTTTTTATTTTTTAGAATTGTATTTTTTTTGTTAAGATTGAATTTTATAGTCATAGATTATAGTTTATTATTAGAGTATGAGGTATTAAACATTAATTCTTGTGGTATTATAATAACTATTTTATTAGATTGAATATCTTTATTATTTATAAGATTTGTATTATTTATTTCATCAATAGTAATTTATTATAGAGAAGAATATATAGAAGGTGATATTTTTATTAATCGTTTTATTATATTAGTTTCTATATTTGTTTTATCAATAATGTTATTGATTATTAGTCCTAATTTAATTAGAATTTTATTAGGTTGAGATGGTCTGGGCCTTGTTTCTTATTGTTTAGTAATTTATTACCAGAATGTGAAATCTTATAAT…
trnH	8010	8073	64				L	ATTTAAATAGTTTAATTAAAATATTGATTTGTGGTATCAAGGATGTAATTTATTACTTTAAATT
nad4	8073	9410	1338	-1	ATG	TAA	L	ATGATAAAATTTTTATTGGCTTTAATTTTTATAGTTCCTATAAGATTTATAAAGTATAGATTTTGATTAAATCAATATTTTTATTTTTTACTTACTTTTTTATATGGGTTTATACTTGTATTTAATTATCAATTTTCCTATATTTCTTATTTTATAGGTTGTGATTTGTTATCTTTTATAATAGTTTTATTAAGATTTTGAATTTGTTCTTTAATAATTTTAGCTTCACAAAAAATTTATATAACTAATTATTTTTATAATGTTTTTATATTTGTTATGATTATGTTATTATTATCTTTGTATATAACTTTTAGGTCTATGAATTTATTTATATTTTATTTATTTTTTGAAGTAAGATTAATTCCTACTTTAATTTTAATTGTAGGCTGAGGCTATCAG…
nad4L	9404	9694	291	-7	ATG	TAA	L	ATGGTAGTTTTTTGTTTATTTTTTTCTTTATTTATATATTTTATAGGGTTAATGTCTTTCTGTGTAAAACGTAAGCATTTACTATTAATATTATTAAGATTAGAGTTTGTAATGTTATCATTATACTTTAATTTGTATTTGTATTTAATGTATTTTAATTATGAGTTTTATTTTAGAATGATTTTTATTAGAATAAGAGTATGTGAGGGGGCTTTAGGGTTAGCCATTTTAGTTTCTATAGTTCGAACTCATAATAATGATTATTTTCAAACATTTAATGTATTATGATAA
trnT	9697	9761	65	2			H	GTTTTAATAATTTATTTAAAATATCGGTCTTGTAAACCGAAAATAAGATTTATTCTTTTAAAACT
trnP	9762	9826	65				L	CAGAGAATAGTTTAATTAAAATATTAATTTTGGAGATTAATGATAGAGGTATACTCTTTCTCTGA
nad6	9828	10328	501	1	ATT	TAA	H	ATTATATTATTAATAATTTTATCCTTCATTAATTCAATTACTTTAATTTGCTTAACACATCCTATATCAATAGGAGGCATTCTTCTAATTCAAACTATTGTAGTAACTTTAACAATTGGATTTTTTCATACCAATTTTTGATACTCTTATATTCTATTTCTTATTATAGTAAGAGGAATGCTAGTTTTATTTGCTTATATAACAAGAGTAGCATCTAATGAAAAATTTATCCCATCAATTAAAATTTTCCTTATAATTATAAGTATCATTACTTTATCCATTTTCATAATAATAATAATAGATCCTTATTACTCTAATATAAATAATGTTTTCTTAGAAACAATAACTAATAACTCAACATATAATATTTCTATAACCAAATATTTTAACTATCCAAAT…
cyt b	10328	11470	1143	-1	ATG	TAG	H	ATGAAAATACCCTTACGAAAAATATCTCCTATATTAAAAATTATTAATAACTCTTTAATCGACTTACCTACACCATCTAATATCTCAACTTGATGAAATTTTGGGTCTCTACTTGGATTATGTCTAATCATTCAAATTTTAACAGGAATCTTCCTTGCTATACATTTTACAGCCCACACTGACTATGCATTTAATAGAGTAATTCATATCTGCCGTGATGTAAACTATGGGTGATTACTACGAGTAATTCATGCTAACGGAGCATCATTTTTCTTTATTTGTATCTACATACATATTGGACGAGGAATTTACTATAGAAGATACAATCTTCATCTTACCTGATCAATTGGAATTATAATTTTATTTATAGTGATAGCAACAGCTTTTCTTGGATATGTT…
S_copy2	11469	11533	65	-2			H	AGTTAATGAACTTGTATAAGTGTATATTTTGAAAATATAAAAAAGAGTTTAACCTCTATTAACTT
nad1	11558	12502	945	24	ATT	TAA	L	ATTATCTTAAAAGATTTATTTTTATTATTTATTGTTAGATTGGTATTGGTAGTTTGTGTTTTAGTTGGTGTAGCATTTTTGACTTTGATAGAGCGAAAGGTTTTAGGTTATATTCAAATTCGAAAAGGTCCTAATAAAGTAGGTTTTATTGGAATTTTGCAGCCTTTTAGAGATGCTATTAAGTTATTTACTAAGGAACAGACATATCCTTTAATATCTAACTTTTATTTATATTATATGGCTCCTGTTTTTAATTTGTTTTTAAGTCTTTTATTATGATTATGTATACCTTTTTTAACTTTTATGTTTAATTTTAATTTAGGTATTTTATATTTTTTATGTTGTTCAAGGTTAGGTGTTTATACAATTATGGTTGCTGGTTGGTCTTCTAATTCTAAT…
L_copy2	12504	12566	63	1			H	TATTACTTGTATTAAAATACATATTTAAATTCTAAATTTAAAGCACTAATCTGCCAAAGTAAT
rrnL	12567	13847	1281				L	AATTAAATGATTATTTATTATTTATAAAAAAAAGAATTTTTATATAAGTATATTTTAGAAAATAATAAGTTAATTATAGTGAATAGTATAGTGATAGAATTTTGAATTATTTATTAAGTTAATTATAAAAAAGAAGAATTTAATTTTTGTACCTTGTGTATCAGGGTTTATTAAAAAAAGTTAATTATTTAATTTTCTCGAATTAAAAAGAGCTATGATTATATAAATTTAAATGTTGCATAATTTTTTATAATATAATTATGGTAGTGAAACGTTAGTCGTTTTTTAAGATATCTAGTTTCTTAAGAAATAAATTTAATTTAATTTTTTAATTACTTATTATTAATTATTTAGTAATGTGTATTAAGAATTAAATATTTTAAGGGATAAGCTTTAAAA…
trnV	13848	13917	70				L	CAAATTAGAGCTTGATATAAAGCATTTTATTTACATTAAAAAGTTAGTTGTGAGAATCAATTTAATTTGA
rrnS	13918	14700	783				L	TATTCTGGCTTAAAATTTTAATTTATGAGCAAATTATATGCTAAGTTTATTGTTTTTGGAGTTTGTTATAGAGTAATAAACTATTAAATTTAATGTTAATTTATGCAATATAGAGAATTAAATATAAAAGAAATTTTGATTTAGGGATTCATAAAAGTATTGATAAAATTTGTGCCAGCAATTGCGGTTACACAGATAATGCGATTAAATTTTTTCAGTGAGTAATATATTTGTTTATTGATTATTTAAATTTAAATTTATTAGGTGAAATTAGTAAGTTTAATTTAAATTGTTTAAATAAGTAATAAGGTTATGAGGTTTTTGTATTAAACTAGGATTAGATACCCTATTATTGAAAATGCAAATTATTATGCTTGAGTAGTAGTAGTTATGTTCTTG…
Overlap:	10	gap:	6

## Sheet: Cyprolais quadrimaculata
Gene	Position		Size	Intergenic nucleotides	Codon
	From	To			Start	Stop	Strand	Sequence
trnI	1	64	64				H	AATGAAGTGTCTGATTATAGAGTTATTTTGATAGAGTAAAACAAGTGCTAACACACCTTCATTA
trnQ	62	129	68	-3			L	TACATTTTAGTATATCATGTACTTAAGTTTTTGATACTTAAAGAGGTAGGTTTATCTACTAAGTGTAA
trnM	133	200	68	3			H	AAAAAGATAAGCTAATTAAGCTAATGGGTTCATACCCCATCTATAAAGGTATAATCCTTTTCTTTTTA
nad2	201	1208	1008		ATA	TAA	H	ATATATTACAAAATCTTATTTACCATATCTCTTATAATAGGAACATTAATTTCAATCTCGTCTTATTCATGAATAGGAATATGAATAGGTCTTGAAATCAACCTCCTTTCTATTATCCCCTTAATAAGAAGGACAAAAAATATAATAAATTCAGAAGCAACCCTAAAATACTTTGTTGTTCAAGCCCTTGCGTCAACAATCTTTTTATTCTCAATCATCATTTCTTCTATTTACTTTTCATTTAATTTAAACCATAGTATTTATATCTCTTTAATTTTAAATACTTCCCTTTTAACAAAAATAGGAGCAGCCCCTTTCCATTTTTGATTTCCGGAAGTAATAGAAGGATTAAATTGACTAAATTCAGCCATTATATTAACATGACAAAAAATTGCCCCT…
trnW	1208	1277	70	-1			H	AAGGATTTAAGTTAATCAAACTAAGAACCTTCAAAGTTCTAAATAAAGACCGTATCCTCTTTAAGCCTTA
trnC	1270	1331	62	-8			L	AGCCTTGTAGTCTATTTAGGATAATAAATTGCAAATTTATTGGAGGGGCTGCCCTAAGGCTT
trnY	1332	1396	65				L	GATAAAGTGGCCGAGATTAGGCGGTAAACTGTAAATTTACAAACGAAATTTAATTTCCTTTATCA
cox1	1398	2928	1531	1	AAC	T	H	AACAAATGACTATTTTCAACAAACCATAAGGATATTGGAACACTTTACTTTTTATTTGGAAGATGAGCAGGAATAGCCGGGACATCCCTTAGTCTCCTGATTCGAGCAGAATTAGGAAACCCCGGCTCATTAATTGGAGACGACCAAATTTATAATGTTATTGTAACTGCCCATGCTTTTATCATAATTTTTTTCATAGTAATACCCATTATGATTGGGGGCTTCGGAAATTGACTAGTACCCTTAATGCTAGGCGCACCGGATATAGCTTTCCCTCGAATAAACAACATAAGATTCTGATTACTCCCCCCATCATTAACACTTCTGTTAATGAGCAGCCTTGTAGAAAGAGGAGCAGGAACGGGATGAACTGTTTACCCCCCTTTGTCTAGTAATATT…
trnL	2929	2993	65				H	TCTAATGTGGCAGAATAGTGCAATGGACTTAAACCCCAAATATAAAGTTTATACTTTTTTTAGAA
cox2	2994	3681	688		ATA	T	H	ATAGCAACATGAAATACCCTACTTCTTCAAGATAGAGCCTCCCCTTTAATAGAGCAGCTATCTTTTTTTCATAATCATACATTAATAATTCTTTTAATAATTACAGTACTTGTAGGTTATTTAATAAGAACATTATTTTTTAATGTGTATAATTACCGGTTTCTTCTAGAAGGACAAATAATTGAGATTATTTGAACTATCCTCCCTGCTATTACTTTAATTTTTATCGCTCTCCCTTCTCTACGCCTTCTTTACTTATTAGACGAAATTAATAACCCTTTAGTTTCTGTTAAAACAATTGGGCATCAATGATATTGATCTTATGAATACAGAGATTTTATAAGATTTGAATTTGATTCCTATATAACACCAATGAGCGATTTAACTAGAAAATCTTTT…
trnK	3682	3752	71				H	CATTAGATGACTGAAAGTAAGTAATGGTCTCTTAAACCAATCTATAGTAAATTAACACCTACTTCTAATGG
trnD	3753	3815	63				H	AAAAGTTTAGTTAATTTATAACATTAATTTGTCAAATTAAAATAGCCATTATGGTAACTTTTA
atp8	3816	3971	156		ATC	TAG	H	ATCCCACAAATATCCCCCTTAAGATGACTCTTACTATTTATTATTTTTTGTGTAACTTTTATTCTATTTAATGTATTAAATTATTTTTGCTTTATTTACCCTGTTAAATTTACACCAATTAAAAAAACAACACAAAAAATTAATTGAAAATGATAG
atp6	3965	4639	675	-7	ATG	TAA	H	ATGATAGCTAATCTATTTTCATCCTTTGACCCATCATCAATTCTAAATATATCTTTAAATTGACTAAGAACATTCCTAGGCCTTCTTTTTGTACCTATGGGATTCTGACTAATCCCATCTCGTTATAATTTTATTTGAAGAAAAATTATTATTACTCTTCACTATGAATTCAAAACTTTAATTGGTAATAATTCTATTAAAGGAAGTACTTTAATTTTTATTTCTTTATTTACTATAATTGTATTTAATAATTTTTTAGGGTTATTCCCTTATATTTTTACAAGAACAAGACATTTAATCTTAACATTGGGGCTAGCTTTACCTTTATGATTTAGTTTTATAATCTTTGGCTGAATTAATCGCACAACTCATATATTTGCCCATCTAGTCCCTCAAGGA…
cox3	4639	5425	787	-1	ATG	T	H	ATGTCTAGACACAAAAATCACCCATTCCATCTTGTAGACGCAAGACCATGACCAATTTTAGGAGCTCTTGGAGCAATAATTTCTATAATTGGGCTAATTAAATGATTCCATTTCTTTGATAATTCATTATTTTTACTAGGAACATTAATCACGATATTGGTGATATACCAATGATGACGAGATATCACACGAGAGGGGACCTTCCAAGGACTCCACACCTACCAAGTTACTATAGGATTACGATGAGGAATAATTCTTTTTATTACTTCTGAAGTATTTTTTTTTGTTTCATTTTTTTGAGCTTTCTTTCACAGAAGATTAACACCTACTATTGAATTAGGAATAACATGACCTCCTAAAGGAATTACCCCATTTAATCCTCTCCAAATCCCATTACTC…
trnG	5426	5490	65				H	ATCTATATAGTATAAAAATTATGATTGACTTCCAATCAATTGATCTAAATAACTTAGTATAGATA
nad3	5491	5844	354		ATA	TAG	H	ATATTAAGAATTTTATATATAAGAATTATCATCTTTATTATTTCATGTGCCCTAATAGCAATCTCGTTTGTAATTTCAAAAAAAAGATTTATAGATCGAGAAAAAGCATCCCCATTTGAATGTGGGTTTGACCCAAAAAGATCCTCCCGATTACCGTTTTCATTACAATTTTTTTTAATCGCCGTAATCTTCCTTATTTTTGATGTAGAAATTACACTTCTAATCCCTTTAATCCTTACAGTTAAATCATGTAACTTAATTTCCTATTATTCTGTTTTTATTATTTTTATTTTAATTTTACTAATTGGGCTTTATCATGAGTGAAACCAAGGAGCCTTAAAATGAGCCCTATAG
trnA	5843	5906	64	-2			H	AGGGTAATAGTTAACTATAACATTTAACTTGCACTTAAAAAGTATTGACCAATCAATTTACCTT
trnR	5907	5972	66				H	AAATAAGAAACAAAAAATTGTGTTTAGTTTCGACCTAAAATTTTGGTGTTAAATTACCCTTATTTA
trnN	5974	6038	65	1			H	TTAATTGAAACCAAAAAGAGGTACATCACTGTTAATGATGCCATTGAAATAAATTTCCAATTAAA
trnS	6039	6105	67				H	GAAGTAAGAAACTCAAGAATAAGCTTCTAACTTAATTCTTTAGCAGTGAAACTCTGTTATTATTTCT
trnE	6106	6172	67				H	ATTTATATAGTTTAATAAAAAAAACATTACATTTTCAATGTAAAATTAGAATTTATTCTTTTAAATA
trnF	6171	6234	64	-2			L	ATTCAAATAGCTTATTTAGAGTATGATATTGAAGATATCAGGGAAGTTGCTTAACTTTTGAGTA
nad5	6234	7949	1716	-1	ATA	TAA	L	ATATCAATTTGTAAAGTTTATAGGGTTAGATTTTTTTTCTTTAGTTTATTAAATTTTTTTATAGGGCTTTATTTTATAGTTATTGATTATGTTTTGTTGTTAGAATATGAACTAATATCAATTAATTCATGTAGAATTATAATAACTATTTTATTAGATTGGATATCCTTATTATTTATGAGATTTGTTTTATTTATTTCATCAATAGTAATTTATTACAGAGAAGAATATATGGAAGGAGATAAATTTATTAATCGGTTTATTATATTAGTGTCAATATTTGTATTGTCGATAATACTGTTAATTATTAGTCCAAATATTATTTCTATTTTGTTAGGTTGGGATGGATTAGGGTTAGTTTCTTATTGTTTAGTTATTTACTATCAAAATGTAAAGTCT…
trnH	7950	8014	65				L	ACTTAAATAGTTTAATAAAAATATTGATTTGTGATATCAAAGATATAATGAAGTTATTTTAGGTA
nad4	8014	9351	1338	-1	ATG	TAA	L	ATGGTAAAGTTTTTTTTGGCATTAGTTTTTATAGTTCCTTTAAGTTTTATAAAGAAAAGGTTTTGGTTAAATCAGTATATATATTTTATATTAACTTTTTTATTTTGTTTGAATATTTGTATGACTAGCCAATTTAATTATGTTTCTTATTTTATAGGGTGTGATTTGTTGTCTTATATTATAATTTTGTTAAGGTTTTGAATTTGTTCTTTAATGGTCTTGGCATCTGAAAAGATTTATAGAACTAAGTATTATTATAAGTTATTTTTGTTGATATTATTATTATTAATAATATGTTTATTTGTAACTTTTAGAAGTATGAATTTATTTGTTTTTTATTTATTTTTTGAGATAAGATTAATTCCTACTTTAATTTTAATTATAGGATGAGGGTATCAA…
nad4L	9345	9635	291	-7	ATG	TAA	L	ATGTTAATATTTTGTATAGTATTTTCTATTTTTATATATTTTTGTGGTTTAGTTTCTTTTTCAATTAAACGTAAACACTTACTTTTGATGCTTTTAAGTTTAGAATTTATTATTTTAAGGTTATATTTTAATTTGTATATTTATTTAATATACTTTGGTTATGAGTTTTATTTTGGGATAATTTTTTTAACTATAAGAGTTTGTGAAGGGGCTTTAGGGTTAGCTATTTTAGTATCTTTAGTACGAACTCATGGTAATGATTATTTTCAAACTTTTAGTATTTTATGGTAA
trnT	9638	9703	66	2			H	GTTTTAATAATTTAATATAAAATAACGGTCTTGTAAATCGTAAATAAGAATTTATCTTTTAAAACT
trnP	9704	9767	64				L	CAGAGAATAGTTTAATGAAAATATTAATTTTGGAGATTAATGATGAGGGTTTCCTTTTCTCTGA
nad6	9769	10272	504	1	GTC	TAA	H	GTCATTATAATTCTACTACTCACATCCTTAATTAGATCAATTATTTTAATATTTTTACAACATCCCCTCTCTATAGGTTTAATACTACTAGCACAAACTATGACCATTGCCTTAACTATAGGACTTTTTAACTTAAATTTCTGATATTCCTATATTATATTTTTAATTATAATTGGGGGGATATTAGTCTTATTTATTTACATGACAAGAGTAGCCTCAAATGAAAAATTTAAATTCTCAATTAAAATTTCTATAATAATTATATTTATAGTAGCGACATCAACTAGTATTTACATATTAATTGATTACTTTCTACCTAACATAAATAATATCTATGAAGAAACCCTAAATAACAATAGAATATTCATTTTATCATTAAACAAATTTTTAAATTACCCT…
cyt b	10272	11414	1143	-1	ATG	TAG	H	ATGAAAATTCCCTTACGAAAAATCTCCCCCGTCACTAAAATTATTAATAACTCTTTAATTGATTTGCCAACCCCATCTAATATTTCTGCATGATGAAACTTCGGGTCACTTCTTGGGCTCTGTTTAATAATTCAAATTATTACAGGAATTTTCCTAGCTATACATTTTTCAGCCCATGTCGATTTAGCATTTAACAGAGTAATCCACATTTGCCGTGATGTAAATTATGGCTGGCTACTTCGAACTCTACATGCTAATGGTGCTTCATTCTTTTTTATCTGTGTCTATATCCATATTGGACGAGGTATATATTATAGATCTTATAATTTACACTTTACCTGAATAATCGGTGTTCTAATTCTATTCTTAGTAATAGCAACTGCATTCCTTGGATATGTA…
S_copy2	11413	11479	67	-2			H	AGTTAATGAACTTGATTAAGTATATGTTTTGAAAACATAATAAAGGGGTAAAATCCCCTATTAACTT
nad1	11499	12449	951	19	ATA	TAG	L	ATAGTTTTAAAGGATTTACTTTTATTATTTATTTCAAGTTTGGTTATAGTTATTTGTGTATTAGTAGGAGTTGCTTTTTTGACATTAATAGAGCGAAAAGTTTTAGGTTATATTCAGATTCGTAAGGGTCCAAATAAGGTCGGGGTTACTGGAATTGTTCAGCCTTTTAGAGATGCAATTAAATTATTTTGTAAAGAGCAGACATATCCTTATATATCTAATTTTAATATATATTATATGTCTCCTGTATTTAATTTATTTTTAGCCTTGGTTTTATGGTTTTGCCTTCCTTTTATTACGTCATTATTTAGTTTTAATTTAGGGTTTTTGTATTTTCTTTGTTGTTCAAGTTTAAGTGTTTATACAATTATAATTGCTGGTTGGTCGTCTAATTCAAAT…
L_copy2	12450	12514	65				L	ATTACTTTGGCAGATTAGTGCTTTAAATTTAGAATTTAAATATGTATTTTATTATACAAGTAATA
rrnL	12515	13802	1288				L	AATGTAAAATTTATATTAGTTGTTTAAAAAAAATATTTTTATAGTTAGTAGTTTAATGAATATTATTTTTATATTATAGTTAATTGTATAGTGATAGGGTGTTGAAATATATTAAAATTTAAATTTTAGGTAAAGAAGATTTTATTTATTGTACCTTGTGTATCAGGGTTTATTAAAATAATTTAATTAGTTAGTTTTCTCGAGTTAATAAGAGTTAATATTATATAGATTTAATTGTGTCATAAATTTTTATAATATAATATTAGAAATGAAACGTTATTCGTTTTTTAAGATATCTAGTTTTTTAAGAAATAAATTTAATTTAGTTTATAGTGTTTTATTATTTTAATTAGTTAATATAATAAATATATGATTAAATATTTTAAGGGATAAGCTTTA…
trnV	13803	13872	70				L	CTGATTAGAGCTTGAGAGAAAGCATTTTATTTACATTAAAAAGTTAGTTGTGAGAATCAATTTAGTCTGA
rrnS	13873	14656	784				L	TTTTATTCTAGCTTGAATTTTTAATTTATAAATTATTTTATATGTAAATTTTAGTGTGAATAAGTTATTCTTTAAATAAGAATAATTTACAAAGTTTGAGTTCGCAATATTGAAGATTAAAAATAAAAGAAATTTTGATTTAGGGATTTATATTAGTATTAACAAAATTTGTGCCAGCAGTTGCGGTTACACAAATAATGCAATTAAATAGGTTTAGTTAATAATTAATTTGTATTTGTTGTTAGTTATCAATAAAATTTATTAGGTGAAATTATTAATTTTTATTTAGCTATAGTATAAAAAATGAGGTTATGAAATTTTTAAAATAGACTAGGATTAGATACCCTATTATTGAAAATTTAAATTATTATACTAGAGTAGTAGTAGTTATGTTCTTGA…
Overlap:	12	gap:	6

[truncated: 8 more sheets: Dicronorhina derbyana, Eudicella euthalia oweni, Eudicella smithi, Goliathus goliatus, Jumnos ruckeri, Mecynorhina polyphemus, Mecynorhina torquata ugandensis, Protaetia speciosa jousselin]
