# Supplementary material for: The Mitochondrial Genomes of 18 New Pleurosticti (Coleoptera: Scarabaeidae) Exhibit a Novel trnQ-NCR-trnI-trnM Gene Rearrangement and Clarify Phylogenetic Relationships of Subfamilies within Scarabaeidae
Source: Insects. 2021 Nov 14;12(11):1025. doi: 10.3390/insects12111025 (PMC8622766; doi:10.3390/insects12111025)
Supplement: Supplementary file 1 [file insects-12-01025-s001.zip › Table S3.xls]

## Sheet: Sheet1
Regions	Strand	Full length (bp)	A (%)	T (%)	C (%)	G (%)	A+T (%)	G+C (%)	AT skew	GC skew	Species	Genus	Subfamily	Family	Superfamily	Order
Full genome	+	16690	38.4	35.3	16.4	9.9	73.7	26.3	0.043	-0.248	Cyprolais quadrimaculata	Cyprolais	Cetoniinae	Scarabaeidae	Scarabaeoidea	Coleoptera
Full genome	+	16609	39.2	35	16.4	9.3	74.2	25.7	0.057	-0.276	Dicronorhina derbyana	Dicronorhina	Cetoniinae	Scarabaeidae	Scarabaeoidea	Coleoptera
Full genome	+	18302	40	34.9	16.3	8.7	74.9	25	0.068	-0.304	Eudicella euthalia oweni	Eudicella	Cetoniinae	Scarabaeidae	Scarabaeoidea	Coleoptera
Full genome	+	16712	39.2	35.6	16	9.2	74.8	25.2	0.048	-0.271	Eudicella smithi	Eudicella	Cetoniinae	Scarabaeidae	Scarabaeoidea	Coleoptera
Full genome	+	18699	38.3	37.2	16.2	8.3	75.5	24.5	0.015	-0.323	Goliathus goliatus	Goliathus	Cetoniinae	Scarabaeidae	Scarabaeoidea	Coleoptera
Full genome	+	19468	37.6	34.2	18.3	9.9	71.8	28.2	0.046	-0.3	Jumnos ruckeri	Jumnos	Cetoniinae	Scarabaeidae	Scarabaeoidea	Coleoptera
Full genome	+	16422	38.2	37	15.8	8.9	75.2	24.7	0.016	-0.278	Mecynorhina polyphemus	Mecynorhina	Cetoniinae	Scarabaeidae	Scarabaeoidea	Coleoptera
Full genome	+	17192	38.2	37.4	15.9	8.6	75.6	24.5	0.011	-0.298	Mecynorhina torquata ugandensis	Mecynorhina	Cetoniinae	Scarabaeidae	Scarabaeoidea	Coleoptera
Full genome	+	16955	39.8	35.2	16	9	75	25	0.062	-0.278	Protaetia speciosa jousselini	Protaetia	Cetoniinae	Scarabaeidae	Scarabaeoidea	Coleoptera
Full genome	+	19444	39.9	36.3	15.3	8.3	76.2	23.6	0.047	-0.295	Chalcosoma caucasus caucasus	Chalcosoma	Dynastinae	Scarabaeidae	Scarabaeoidea	Coleoptera
Full genome	+	17813	36.1	31	21.3	11.4	67.1	32.7	0.076	-0.301	Dynastes hercules hercules	Dynastes	Dynastinae	Scarabaeidae	Scarabaeoidea	Coleoptera
Full genome	+	16785	38.5	31.6	20	10	70.1	30	0.099	-0.334	Megasoma elephas elephas	Megasoma	Dynastinae	Scarabaeidae	Scarabaeoidea	Coleoptera
Full genome	+	16983	38.4	31.5	20.1	10	69.9	30.1	0.099	-0.336	Megasoma mars	Megasoma	Dynastinae	Scarabaeidae	Scarabaeoidea	Coleoptera
Full genome	+	20396	39	31.3	19.4	10.1	70.3	29.5	0.11	-0.315	Oryctes nasicornis	Oryctes	Dynastinae	Scarabaeidae	Scarabaeoidea	Coleoptera
Full genome	+	18567	39.4	36.9	15.1	8.6	76.3	23.7	0.032	-0.275	Xylotrupes beckeri intermedius	Xylotrupes	Dynastinae	Scarabaeidae	Scarabaeoidea	Coleoptera
Full genome	+	18434	39.5	36.8	15.2	8.6	76.3	23.8	0.035	-0.277	Xylotrupes gideon beckeri	Xylotrupes	Dynastinae	Scarabaeidae	Scarabaeoidea	Coleoptera
Full genome	+	18660	39.8	37.3	14.6	8.2	77.1	22.8	0.032	-0.277	Xylotrupes gideon siamensis	Xylotrupes	Dynastinae	Scarabaeidae	Scarabaeoidea	Coleoptera
Full genome	+	19687	39.4	36.7	15.6	8.2	76.1	23.8	0.035	-0.312	Xylotrupes gideon sumatrensis	Xylotrupes	Dynastinae	Scarabaeidae	Scarabaeoidea	Coleoptera
Table S3. Nucleotide composition and skewness of the whole mitogenomes of Cetoniinae and Dynastinae species
