# Supplementary material for: The Mitochondrial Genomes of 18 New Pleurosticti (Coleoptera: Scarabaeidae) Exhibit a Novel trnQ-NCR-trnI-trnM Gene Rearrangement and Clarify Phylogenetic Relationships of Subfamilies within Scarabaeidae
Source: Insects. 2021 Nov 14;12(11):1025. doi: 10.3390/insects12111025 (PMC8622766; doi:10.3390/insects12111025)
Supplement: Supplementary file 1 [file insects-12-01025-s001.zip › Table S4.xls]

## Sheet: Nucleotide Composition
Domain: Data
CETONIINAE SPECIES	T(U)	C	A	G	Total	A+T%	G+C%	A-T%	G-C%	AT Skew	GC Skew	T-1	C-1	A-1	G-1	Pos #1	T-2	C-2	A-2	G-2	Pos #2	T-3	C-3	A-3	G-3	Pos #3
Cyprolais quadrimaculata	40.8152	14.6885	30.6967	13.7996	11139	71.5119	28.4881	-10.1185	-0.888849	-0.141494	-0.0312008	33.5847	13.951	33.2884	19.1759	3713	46.5517	18.8578	20.1778	14.4127	3712	42.3108	11.2577	38.6211	7.8104	3713
Dicronorhina derbyana	40.9732	14.4717	31.2416	13.3136	11139	72.2147	27.7853	-9.73157	-1.15809	-0.134759	-0.0416801	33.0999	14.0587	33.8002	19.0412	3713	46.7008	18.5564	20.5764	14.1664	3713	43.1188	10.7999	39.3482	6.7331	3713
Eudicella euthalia oweni	41.5657	14.0856	31.1698	13.1789	11139	72.7354	27.2646	-10.3959	-0.906724	-0.142928	-0.0332565	33.6655	13.6817	33.477	19.1759	3713	46.7546	18.7988	20.1724	14.2742	3713	44.2769	9.77646	39.86	6.08672	3713
Eudicella smithi	41.5477	14.0767	31.2685	13.1071	11139	72.8162	27.1838	-10.2792	-0.969566	-0.141166	-0.0356671	33.9348	13.4931	33.3692	19.2028	3713	46.6738	18.8796	20.1454	14.3011	3713	44.0345	9.85726	40.2909	5.8174	3713
Goliathus goliatus	42.421	13.8111	31.2231	12.5449	11136	73.644	26.356	-11.1979	-1.26616	-0.152055	-0.0480409	33.8362	13.7662	34.3481	18.0496	3712	46.7942	18.6153	20.3125	14.278	3712	46.6325	9.05172	39.0086	5.30711	3712
Jumnos ruckeri	40.9193	14.9744	30.3259	13.7804	11139	71.2452	28.7548	-10.5934	-1.194	-0.14869	-0.0415236	33.854	13.6547	33.8271	18.6642	3713	46.4584	19.0143	20.0916	14.4358	3713	42.4455	12.2542	37.059	8.24131	3713
Mecynorhina polyphemus	42.1606	13.7751	31.3218	12.7425	11136	73.4824	26.5176	-10.8387	-1.03269	-0.147501	-0.0389434	33.944	13.4159	33.9709	18.6692	3712	46.3362	18.8308	20.5819	14.2511	3712	46.2015	9.07866	39.4127	5.30711	3712
Mecynorhina torquata ugandensis	42.421	13.8111	31.2231	12.5449	11136	73.644	26.356	-11.1979	-1.26616	-0.152055	-0.0480409	33.8362	13.7662	34.3481	18.0496	3712	46.7942	18.6153	20.3125	14.278	3712	46.6325	9.05172	39.0086	5.30711	3712
Protaetia speciosa jousselini	41.383	13.7943	31.9174	12.9053	11136	73.3004	26.6996	-9.46565	-0.889088	-0.129135	-0.0332997	34.5729	12.7189	34.0609	18.6473	3711	46.4709	18.9655	20.3933	14.1703	3712	43.1034	9.69828	41.2985	5.89978	3712
DYNASTINAE SPECIES
Chalcosoma caucasus caucasus	42.3965	12.5842	32.8393	12.18	11133	75.2358	24.7642	-9.55717	-0.404204	-0.12703	-0.0163221	35.7316	11.8297	34.2765	18.1622	3711	46.6721	18.5934	20.6952	14.0393	3711	44.7858	7.32956	43.5462	4.33845	3711
Dynastes hercules hercules	37.6179	18.27	28.6356	15.4765	11133	66.2535	33.7465	-8.9823	-2.7935	-0.135575	-0.0827788	30.962	16.8688	32.2016	19.9677	3711	46.214	19.294	20.0485	14.4435	3711	35.6777	18.6473	33.6567	12.0183	3711
Megasoma elephas elephas	38.9922	16.5724	29.6865	14.7489	11133	68.6787	31.3213	-9.30567	-1.82341	-0.135496	-0.0582162	31.9321	15.6562	32.6597	19.7521	3711	46.5373	19.3209	19.8329	14.3088	3711	38.5071	14.74	36.567	10.1859	3711
Megasoma mars	38.9922	16.5724	29.6865	14.7489	11133	68.6787	31.3213	-9.30567	-1.82341	-0.135496	-0.0582162	31.9321	15.6562	32.6597	19.7521	3711	46.5373	19.3209	19.8329	14.3088	3711	38.5071	14.74	36.567	10.1859	3711
Oryctes nasicornis	39.876	15.8552	29.6622	14.6065	11133	69.5383	30.4617	-10.2138	-1.24865	-0.14688	-0.0409909	32.6954	14.7978	32.2911	20.2156	3710	46.2679	19.1862	20.5605	13.9854	3711	40.6629	13.5812	36.1358	9.62005	3711
Xylotrupes beckeri intermedius	42.3433	12.9125	32.3442	12.4	11124	74.6875	25.3125	-9.9991	-0.512544	-0.133879	-0.0202487	35.383	12.055	34.4121	18.1499	3708	47.0604	18.3657	20.8468	13.7271	3708	44.5884	8.31309	41.7814	5.31714	3705
Xylotrupes gideon beckeri	42.4474	12.7945	32.3863	12.3719	11124	74.8337	25.1663	-10.0611	-0.422586	-0.134447	-0.0167917	35.2846	12.2741	34.1786	18.2627	3707	47.0192	18.3707	20.8794	13.7308	3707	45.0378	7.74002	42.0982	5.12406	3708
Xylotrupes gideon siamensis	42.9509	12.4888	32.5751	11.9853	11124	75.526	24.474	-10.3758	-0.503507	-0.137381	-0.0205731	35.2751	12.2977	34.1694	18.2578	3708	46.9256	18.5005	20.7659	13.808	3708	46.6541	6.66487	42.7955	3.88559	3706
Xylotrupes gideon sumatrensis	42.4308	12.8191	32.3894	12.3607	11124	74.8202	25.1798	-10.0414	-0.458468	-0.134206	-0.0182078	35.2751	12.2708	34.1424	18.3118	3708	47.0065	18.3927	20.8738	13.7271	3708	45.0108	7.79396	42.1521	5.04315	3708
Table S4. Base composition, the percent of A, C, G and T, AT skew and GC skew of nucleotide sequence of 13PCGs of Cetoniinae and Dynastinae species

## Sheet: PCG
Regions	Strand	Size (bp)	T(U)	C	A	G	AT(%)	GC(%)	GT(%)	AT skewness	GC skewness	Species	Genus	Subfamily	Family	Superfamily	Order	Class
Full genome	+	16690	35.3	16.4	38.4	9.9	73.7	26.3	45.2	0.043	-0.248	Cyprolais quadrimaculata	Cyprolais	Cetoniinae	Scarabaeidae	Scarabaeoidea	Neoptera	N/A
PCGs	+	6843	37.4	18.4	31.9	12.4	69.3	30.8	49.8	-0.079	-0.194	Cyprolais quadrimaculata	Cyprolais	Cetoniinae	Scarabaeidae	Scarabaeoidea	Neoptera	N/A
PCGs	-	4296	46.3	8.8	28.8	16	75.1	24.8	62.3	-0.233	0.29	Cyprolais quadrimaculata	Cyprolais	Cetoniinae	Scarabaeidae	Scarabaeoidea	Neoptera	N/A
tRNAs	+	928	35.5	12.6	40.1	11.9	75.6	24.5	47.4	0.061	-0.031	Cyprolais quadrimaculata	Cyprolais	Cetoniinae	Scarabaeidae	Scarabaeoidea	Neoptera	N/A
tRNAs	-	523	38	8.8	35	18.2	73	27	56.2	-0.042	0.348	Cyprolais quadrimaculata	Cyprolais	Cetoniinae	Scarabaeidae	Scarabaeoidea	Neoptera	N/A
rRNAs	-	2072	41	7	36.3	15.6	77.3	22.6	56.6	-0.061	0.379	Cyprolais quadrimaculata	Cyprolais	Cetoniinae	Scarabaeidae	Scarabaeoidea	Neoptera	N/A
1st codon position	+	2281	28.5	17.7	35.2	18.6	63.7	36.3	47.1	0.106	0.025	Cyprolais quadrimaculata	Cyprolais	Cetoniinae	Scarabaeidae	Scarabaeoidea	Neoptera	N/A
1st codon position	-	1432	41.8	8	30.2	20	72	28	61.8	-0.16	0.431	Cyprolais quadrimaculata	Cyprolais	Cetoniinae	Scarabaeidae	Scarabaeoidea	Neoptera	N/A
2nd codon position	+	2281	44.9	21.3	20.3	13.4	65.2	34.7	58.3	-0.377	-0.229	Cyprolais quadrimaculata	Cyprolais	Cetoniinae	Scarabaeidae	Scarabaeoidea	Neoptera	N/A
2nd codon position	-	1432	49.1	14.9	19.9	16.1	69	31	65.2	-0.423	0.036	Cyprolais quadrimaculata	Cyprolais	Cetoniinae	Scarabaeidae	Scarabaeoidea	Neoptera	N/A
3rd codon position	+	2281	38.7	16.1	40.1	5.2	78.8	21.3	43.9	0.018	-0.513	Cyprolais quadrimaculata	Cyprolais	Cetoniinae	Scarabaeidae	Scarabaeoidea	Neoptera	N/A
3rd codon position	-	1432	48.1	3.6	36.3	12	84.4	15.6	60.1	-0.14	0.543	Cyprolais quadrimaculata	Cyprolais	Cetoniinae	Scarabaeidae	Scarabaeoidea	Neoptera	N/A
atp6	+	675	39.3	18.2	30.8	11.6	70.1	29.8	50.9	-0.121	-0.224	Cyprolais quadrimaculata	Cyprolais	Cetoniinae	Scarabaeidae	Scarabaeoidea	Neoptera	N/A
atp8	+	156	41	15.4	37.2	6.4	78.2	21.8	47.4	-0.049	-0.412	Cyprolais quadrimaculata	Cyprolais	Cetoniinae	Scarabaeidae	Scarabaeoidea	Neoptera	N/A
cox1	+	1531	35.7	19.3	28.3	16.7	64	36	52.4	-0.116	-0.071	Cyprolais quadrimaculata	Cyprolais	Cetoniinae	Scarabaeidae	Scarabaeoidea	Neoptera	N/A
cox2	+	688	36.2	18.5	32.8	12.5	69	31	48.7	-0.048	-0.192	Cyprolais quadrimaculata	Cyprolais	Cetoniinae	Scarabaeidae	Scarabaeoidea	Neoptera	N/A
cox3	+	787	36.1	19.2	30.9	13.9	67	33.1	50	-0.078	-0.162	Cyprolais quadrimaculata	Cyprolais	Cetoniinae	Scarabaeidae	Scarabaeoidea	Neoptera	N/A
cyt b	+	1143	37.8	19.3	30.3	12.6	68.1	31.9	50.4	-0.111	-0.211	Cyprolais quadrimaculata	Cyprolais	Cetoniinae	Scarabaeidae	Scarabaeoidea	Neoptera	N/A
nad1	-	951	46.7	8.9	26.7	17.7	73.4	26.6	64.4	-0.272	0.328	Cyprolais quadrimaculata	Cyprolais	Cetoniinae	Scarabaeidae	Scarabaeoidea	Neoptera	N/A
nad2	+	1008	37.7	17.9	35.8	8.6	73.5	26.5	46.3	-0.026	-0.348	Cyprolais quadrimaculata	Cyprolais	Cetoniinae	Scarabaeidae	Scarabaeoidea	Neoptera	N/A
nad3	+	354	40.4	16.4	31.6	11.6	72	28	52	-0.122	-0.172	Cyprolais quadrimaculata	Cyprolais	Cetoniinae	Scarabaeidae	Scarabaeoidea	Neoptera	N/A
nad4	-	1338	46.9	8.2	28.9	16	75.8	24.2	62.9	-0.237	0.321	Cyprolais quadrimaculata	Cyprolais	Cetoniinae	Scarabaeidae	Scarabaeoidea	Neoptera	N/A
nad4L	-	291	51.9	6.2	27.1	14.8	79	21	66.7	-0.313	0.41	Cyprolais quadrimaculata	Cyprolais	Cetoniinae	Scarabaeidae	Scarabaeoidea	Neoptera	N/A
nad5	-	1716	44.8	9.7	30.2	15.4	75	25.1	60.2	-0.194	0.228	Cyprolais quadrimaculata	Cyprolais	Cetoniinae	Scarabaeidae	Scarabaeoidea	Neoptera	N/A
nad6	+	504	38.7	15.5	38.5	7.3	77.2	22.8	46	-0.003	-0.357	Cyprolais quadrimaculata	Cyprolais	Cetoniinae	Scarabaeidae	Scarabaeoidea	Neoptera	N/A
rrnL	-	1288	42.2	6.4	36.1	15.3	78.3	21.7	57.5	-0.078	0.412	Cyprolais quadrimaculata	Cyprolais	Cetoniinae	Scarabaeidae	Scarabaeoidea	Neoptera	N/A
rrnS	-	784	39	8.2	36.6	16.2	75.6	24.4	55.2	-0.032	0.33	Cyprolais quadrimaculata	Cyprolais	Cetoniinae	Scarabaeidae	Scarabaeoidea	Neoptera	N/A
Full genome	+	16609	35	16.4	39.2	9.3	74.2	25.7	44.3	0.057	-0.276	Dicronorhina derbyana	Dicronorhina	Cetoniinae	Scarabaeidae	Scarabaeoidea	Neoptera	N/A
PCGs	+	6843	37.1	18.4	32.8	11.7	69.9	30.1	48.8	-0.062	-0.225	Dicronorhina derbyana	Dicronorhina	Cetoniinae	Scarabaeidae	Scarabaeoidea	Neoptera	N/A
PCGs	-	4296	47.1	8.2	28.8	15.9	75.9	24.1	63	-0.241	0.322	Dicronorhina derbyana	Dicronorhina	Cetoniinae	Scarabaeidae	Scarabaeoidea	Neoptera	N/A
tRNAs	+	799	36.7	12.5	39.5	11.3	76.2	23.8	48	0.038	-0.053	Dicronorhina derbyana	Dicronorhina	Cetoniinae	Scarabaeidae	Scarabaeoidea	Neoptera	N/A
tRNAs	-	591	37.9	9.5	36	16.6	73.9	26.1	54.5	-0.025	0.273	Dicronorhina derbyana	Dicronorhina	Cetoniinae	Scarabaeidae	Scarabaeoidea	Neoptera	N/A
rRNAs	-	2074	41.2	7.2	35.6	16	76.8	23.2	57.2	-0.073	0.379	Dicronorhina derbyana	Dicronorhina	Cetoniinae	Scarabaeidae	Scarabaeoidea	Neoptera	N/A
1st codon position	+	2281	27.6	18	36	18.4	63.6	36.4	46	0.132	0.01	Dicronorhina derbyana	Dicronorhina	Cetoniinae	Scarabaeidae	Scarabaeoidea	Neoptera	N/A
1st codon position	-	1432	41.8	7.8	30.3	20.1	72.1	27.9	61.9	-0.16	0.444	Dicronorhina derbyana	Dicronorhina	Cetoniinae	Scarabaeidae	Scarabaeoidea	Neoptera	N/A
2nd codon position	+	2281	45.2	21.1	20.6	13.2	65.8	34.3	58.4	-0.374	-0.233	Dicronorhina derbyana	Dicronorhina	Cetoniinae	Scarabaeidae	Scarabaeoidea	Neoptera	N/A
2nd codon position	-	1432	49.2	14.5	20.6	15.8	69.8	30.3	65	-0.409	0.044	Dicronorhina derbyana	Dicronorhina	Cetoniinae	Scarabaeidae	Scarabaeoidea	Neoptera	N/A
3rd codon position	+	2281	38.6	16.1	41.8	3.5	80.4	19.6	42.1	0.039	-0.647	Dicronorhina derbyana	Dicronorhina	Cetoniinae	Scarabaeidae	Scarabaeoidea	Neoptera	N/A
3rd codon position	-	1432	50.3	2.3	35.5	11.9	85.8	14.2	62.2	-0.173	0.676	Dicronorhina derbyana	Dicronorhina	Cetoniinae	Scarabaeidae	Scarabaeoidea	Neoptera	N/A
atp6	+	675	39.3	17.9	31.6	11.3	70.9	29.2	50.6	-0.109	-0.228	Dicronorhina derbyana	Dicronorhina	Cetoniinae	Scarabaeidae	Scarabaeoidea	Neoptera	N/A
atp8	+	156	41	17.9	34.6	6.4	75.6	24.3	47.4	-0.085	-0.474	Dicronorhina derbyana	Dicronorhina	Cetoniinae	Scarabaeidae	Scarabaeoidea	Neoptera	N/A
cox1	+	1531	36.2	19.7	28.5	15.7	64.7	35.4	51.9	-0.119	-0.113	Dicronorhina derbyana	Dicronorhina	Cetoniinae	Scarabaeidae	Scarabaeoidea	Neoptera	N/A
cox2	+	688	34.6	18.9	34.3	12.2	68.9	31.1	46.8	-0.004	-0.215	Dicronorhina derbyana	Dicronorhina	Cetoniinae	Scarabaeidae	Scarabaeoidea	Neoptera	N/A
cox3	+	787	35.8	20.1	30.2	13.9	66	34	49.7	-0.085	-0.184	Dicronorhina derbyana	Dicronorhina	Cetoniinae	Scarabaeidae	Scarabaeoidea	Neoptera	N/A
cyt b	+	1143	37.9	17.6	32.9	11.6	70.8	29.2	49.5	-0.07	-0.204	Dicronorhina derbyana	Dicronorhina	Cetoniinae	Scarabaeidae	Scarabaeoidea	Neoptera	N/A
nad1	-	951	47.7	7.3	27.8	17.2	75.5	24.5	64.9	-0.265	0.408	Dicronorhina derbyana	Dicronorhina	Cetoniinae	Scarabaeidae	Scarabaeoidea	Neoptera	N/A
nad2	+	1008	35.2	19.1	37.8	7.8	73	26.9	43	0.035	-0.419	Dicronorhina derbyana	Dicronorhina	Cetoniinae	Scarabaeidae	Scarabaeoidea	Neoptera	N/A
nad3	+	354	42.9	16.7	30.2	10.2	73.1	26.9	53.1	-0.174	-0.242	Dicronorhina derbyana	Dicronorhina	Cetoniinae	Scarabaeidae	Scarabaeoidea	Neoptera	N/A
nad4	-	1338	47.5	7.8	28.4	16.2	75.9	24	63.7	-0.252	0.348	Dicronorhina derbyana	Dicronorhina	Cetoniinae	Scarabaeidae	Scarabaeoidea	Neoptera	N/A
nad4L	-	291	51.5	6.9	27.8	13.7	79.3	20.6	65.2	-0.299	0.333	Dicronorhina derbyana	Dicronorhina	Cetoniinae	Scarabaeidae	Scarabaeoidea	Neoptera	N/A
nad5	-	1716	45.6	9.1	29.8	15.4	75.4	24.5	61	-0.209	0.254	Dicronorhina derbyana	Dicronorhina	Cetoniinae	Scarabaeidae	Scarabaeoidea	Neoptera	N/A
nad6	+	504	39.9	13.9	40.1	6.2	80	20.1	46.1	0.002	-0.386	Dicronorhina derbyana	Dicronorhina	Cetoniinae	Scarabaeidae	Scarabaeoidea	Neoptera	N/A
rrnL	-	1291	42.1	6.7	35.2	16	77.3	22.7	58.1	-0.09	0.406	Dicronorhina derbyana	Dicronorhina	Cetoniinae	Scarabaeidae	Scarabaeoidea	Neoptera	N/A
rrnS	-	783	39.7	7.9	36.4	16	76.1	23.9	55.7	-0.044	0.337	Dicronorhina derbyana	Dicronorhina	Cetoniinae	Scarabaeidae	Scarabaeoidea	Neoptera	N/A
Full genome	+	18302	34.9	16.3	40	8.7	74.9	25	43.6	0.068	-0.304	Eudicella euthalia oweni	Eudicella	Cetoniinae	Scarabaeidae	Scarabaeoidea	Neoptera	N/A
PCGs	+	6843	38.1	17.8	32.6	11.5	70.7	29.3	49.6	-0.079	-0.217	Eudicella euthalia oweni	Eudicella	Cetoniinae	Scarabaeidae	Scarabaeoidea	Neoptera	N/A
PCGs	-	4296	47	8.1	29	15.9	76	24	62.9	-0.238	0.324	Eudicella euthalia oweni	Eudicella	Cetoniinae	Scarabaeidae	Scarabaeoidea	Neoptera	N/A
tRNAs	+	917	35.8	12.6	39.9	11.7	75.7	24.3	47.5	0.055	-0.04	Eudicella euthalia oweni	Eudicella	Cetoniinae	Scarabaeidae	Scarabaeoidea	Neoptera	N/A
tRNAs	-	525	39.2	8.2	35	17.5	74.2	25.7	56.7	-0.056	0.363	Eudicella euthalia oweni	Eudicella	Cetoniinae	Scarabaeidae	Scarabaeoidea	Neoptera	N/A
rRNAs	-	2071	41.6	6.9	35.6	15.9	77.2	22.8	57.5	-0.078	0.395	Eudicella euthalia oweni	Eudicella	Cetoniinae	Scarabaeidae	Scarabaeoidea	Neoptera	N/A
1st codon position	+	2281	28.4	17.7	35.4	18.6	63.8	36.3	47	0.11	0.025	Eudicella euthalia oweni	Eudicella	Cetoniinae	Scarabaeidae	Scarabaeoidea	Neoptera	N/A
1st codon position	-	1432	42.1	7.3	30.4	20.1	72.5	27.4	62.2	-0.161	0.466	Eudicella euthalia oweni	Eudicella	Cetoniinae	Scarabaeidae	Scarabaeoidea	Neoptera	N/A
2nd codon position	+	2281	45.2	21.4	20.2	13.2	65.4	34.6	58.4	-0.382	-0.236	Eudicella euthalia oweni	Eudicella	Cetoniinae	Scarabaeidae	Scarabaeoidea	Neoptera	N/A
2nd codon position	-	1432	49.2	14.7	20.1	16	69.3	30.7	65.2	-0.419	0.041	Eudicella euthalia oweni	Eudicella	Cetoniinae	Scarabaeidae	Scarabaeoidea	Neoptera	N/A
3rd codon position	+	2281	40.8	14.5	42.1	2.6	82.9	17.1	43.4	0.015	-0.692	Eudicella euthalia oweni	Eudicella	Cetoniinae	Scarabaeidae	Scarabaeoidea	Neoptera	N/A
3rd codon position	-	1432	49.8	2.3	36.3	11.6	86.1	13.9	61.4	-0.157	0.668	Eudicella euthalia oweni	Eudicella	Cetoniinae	Scarabaeidae	Scarabaeoidea	Neoptera	N/A
atp6	+	675	40.4	17.5	31.1	11	71.5	28.5	51.4	-0.13	-0.229	Eudicella euthalia oweni	Eudicella	Cetoniinae	Scarabaeidae	Scarabaeoidea	Neoptera	N/A
atp8	+	156	39.7	19.2	33.3	7.7	73	26.9	47.4	-0.088	-0.429	Eudicella euthalia oweni	Eudicella	Cetoniinae	Scarabaeidae	Scarabaeoidea	Neoptera	N/A
cox1	+	1531	36.2	18.9	29.7	15.2	65.9	34.1	51.4	-0.098	-0.107	Eudicella euthalia oweni	Eudicella	Cetoniinae	Scarabaeidae	Scarabaeoidea	Neoptera	N/A
cox2	+	688	35.8	17.9	34.9	11.5	70.7	29.4	47.3	-0.012	-0.218	Eudicella euthalia oweni	Eudicella	Cetoniinae	Scarabaeidae	Scarabaeoidea	Neoptera	N/A
cox3	+	787	38.6	18.2	30	13.2	68.6	31.4	51.8	-0.126	-0.158	Eudicella euthalia oweni	Eudicella	Cetoniinae	Scarabaeidae	Scarabaeoidea	Neoptera	N/A
cyt b	+	1143	38.2	18.6	31.4	11.7	69.6	30.3	49.9	-0.098	-0.228	Eudicella euthalia oweni	Eudicella	Cetoniinae	Scarabaeidae	Scarabaeoidea	Neoptera	N/A
nad1	-	951	48.6	7.9	27.3	16.2	75.9	24.1	64.8	-0.28	0.345	Eudicella euthalia oweni	Eudicella	Cetoniinae	Scarabaeidae	Scarabaeoidea	Neoptera	N/A
nad2	+	1008	38	17.5	36.6	7.9	74.6	25.4	45.9	-0.019	-0.375	Eudicella euthalia oweni	Eudicella	Cetoniinae	Scarabaeidae	Scarabaeoidea	Neoptera	N/A
nad3	+	354	41.5	15.8	32.2	10.5	73.7	26.3	52	-0.126	-0.204	Eudicella euthalia oweni	Eudicella	Cetoniinae	Scarabaeidae	Scarabaeoidea	Neoptera	N/A
nad4	-	1338	47.1	8	28.8	16.1	75.9	24.1	63.2	-0.24	0.335	Eudicella euthalia oweni	Eudicella	Cetoniinae	Scarabaeidae	Scarabaeoidea	Neoptera	N/A
nad4L	-	291	49.8	6.9	27.5	15.8	77.3	22.7	65.6	-0.289	0.394	Eudicella euthalia oweni	Eudicella	Cetoniinae	Scarabaeidae	Scarabaeoidea	Neoptera	N/A
nad5	-	1716	45.6	8.6	30.2	15.6	75.8	24.2	61.2	-0.204	0.292	Eudicella euthalia oweni	Eudicella	Cetoniinae	Scarabaeidae	Scarabaeoidea	Neoptera	N/A
nad6	+	504	41.1	14.3	38.3	6.3	79.4	20.6	47.4	-0.035	-0.385	Eudicella euthalia oweni	Eudicella	Cetoniinae	Scarabaeidae	Scarabaeoidea	Neoptera	N/A
rrnL	-	1285	42.3	6.3	35.6	15.9	77.9	22.2	58.2	-0.086	0.432	Eudicella euthalia oweni	Eudicella	Cetoniinae	Scarabaeidae	Scarabaeoidea	Neoptera	N/A
rrnS	-	786	40.5	7.9	35.6	16	76.1	23.9	56.5	-0.064	0.34	Eudicella euthalia oweni	Eudicella	Cetoniinae	Scarabaeidae	Scarabaeoidea	Neoptera	N/A
Full genome	+	16712	35.6	16	39.2	9.2	74.8	25.2	44.8	0.048	-0.271	Eudicella smithi	Eudicella	Cetoniinae	Scarabaeidae	Scarabaeoidea	Neoptera	N/A
PCGs	+	6843	38.3	17.8	32.4	11.5	70.7	29.3	49.8	-0.082	-0.215	Eudicella smithi	Eudicella	Cetoniinae	Scarabaeidae	Scarabaeoidea	Neoptera	N/A
PCGs	-	4296	46.8	8.2	29.4	15.7	76.2	23.9	62.5	-0.228	0.314	Eudicella smithi	Eudicella	Cetoniinae	Scarabaeidae	Scarabaeoidea	Neoptera	N/A
tRNAs	+	918	35.7	12.7	39.9	11.7	75.6	24.4	47.4	0.055	-0.045	Eudicella smithi	Eudicella	Cetoniinae	Scarabaeidae	Scarabaeoidea	Neoptera	N/A
tRNAs	-	525	39	8.4	34.9	17.7	73.9	26.1	56.7	-0.057	0.358	Eudicella smithi	Eudicella	Cetoniinae	Scarabaeidae	Scarabaeoidea	Neoptera	N/A
rRNAs	-	2068	41.3	7.1	36.1	15.4	77.4	22.5	56.7	-0.067	0.369	Eudicella smithi	Eudicella	Cetoniinae	Scarabaeidae	Scarabaeoidea	Neoptera	N/A
1st codon position	+	2281	28.7	17.4	35.2	18.6	63.9	36	47.3	0.102	0.033	Eudicella smithi	Eudicella	Cetoniinae	Scarabaeidae	Scarabaeoidea	Neoptera	N/A
1st codon position	-	1432	42.2	7.2	30.4	20.1	72.6	27.3	62.3	-0.162	0.473	Eudicella smithi	Eudicella	Cetoniinae	Scarabaeidae	Scarabaeoidea	Neoptera	N/A
2nd codon position	+	2281	45.2	21.5	20.2	13.2	65.4	34.7	58.4	-0.383	-0.239	Eudicella smithi	Eudicella	Cetoniinae	Scarabaeidae	Scarabaeoidea	Neoptera	N/A
2nd codon position	-	1432	49.1	14.7	20.1	16.1	69.2	30.8	65.2	-0.419	0.043	Eudicella smithi	Eudicella	Cetoniinae	Scarabaeidae	Scarabaeoidea	Neoptera	N/A
3rd codon position	+	2281	40.9	14.4	42	2.7	82.9	17.1	43.6	0.012	-0.687	Eudicella smithi	Eudicella	Cetoniinae	Scarabaeidae	Scarabaeoidea	Neoptera	N/A
3rd codon position	-	1432	49	2.6	37.6	10.8	86.6	13.4	59.8	-0.131	0.615	Eudicella smithi	Eudicella	Cetoniinae	Scarabaeidae	Scarabaeoidea	Neoptera	N/A
atp6	+	675	40.3	17.6	31	11.1	71.3	28.7	51.4	-0.131	-0.227	Eudicella smithi	Eudicella	Cetoniinae	Scarabaeidae	Scarabaeoidea	Neoptera	N/A
atp8	+	156	39.7	18.6	34.6	7.1	74.3	25.7	46.8	-0.069	-0.45	Eudicella smithi	Eudicella	Cetoniinae	Scarabaeidae	Scarabaeoidea	Neoptera	N/A
cox1	+	1531	37	18.2	29.7	15.2	66.7	33.4	52.2	-0.11	-0.088	Eudicella smithi	Eudicella	Cetoniinae	Scarabaeidae	Scarabaeoidea	Neoptera	N/A
cox2	+	688	35.5	17.9	34.4	12.2	69.9	30.1	47.7	-0.015	-0.188	Eudicella smithi	Eudicella	Cetoniinae	Scarabaeidae	Scarabaeoidea	Neoptera	N/A
cox3	+	787	38.5	18.8	29.5	13.2	68	32	51.7	-0.133	-0.175	Eudicella smithi	Eudicella	Cetoniinae	Scarabaeidae	Scarabaeoidea	Neoptera	N/A
cyt b	+	1143	38	18.7	31.3	12	69.3	30.7	50	-0.096	-0.219	Eudicella smithi	Eudicella	Cetoniinae	Scarabaeidae	Scarabaeoidea	Neoptera	N/A
nad1	-	951	47.5	8.6	27.4	16.4	74.9	25	63.9	-0.268	0.311	Eudicella smithi	Eudicella	Cetoniinae	Scarabaeidae	Scarabaeoidea	Neoptera	N/A
nad2	+	1008	37.8	18	37	7.2	74.8	25.2	45	-0.011	-0.425	Eudicella smithi	Eudicella	Cetoniinae	Scarabaeidae	Scarabaeoidea	Neoptera	N/A
nad3	+	354	42.1	15.3	31.9	10.7	74	26	52.8	-0.137	-0.174	Eudicella smithi	Eudicella	Cetoniinae	Scarabaeidae	Scarabaeoidea	Neoptera	N/A
nad4	-	1338	47.2	7.7	29.4	15.7	76.6	23.4	62.9	-0.233	0.342	Eudicella smithi	Eudicella	Cetoniinae	Scarabaeidae	Scarabaeoidea	Neoptera	N/A
nad4L	-	291	50.2	6.2	27.8	15.8	78	22	66	-0.286	0.438	Eudicella smithi	Eudicella	Cetoniinae	Scarabaeidae	Scarabaeoidea	Neoptera	N/A
nad5	-	1716	45.4	8.6	30.8	15.2	76.2	23.8	60.6	-0.192	0.276	Eudicella smithi	Eudicella	Cetoniinae	Scarabaeidae	Scarabaeoidea	Neoptera	N/A
nad6	+	504	41.9	14.1	37.7	6.3	79.6	20.4	48.2	-0.052	-0.379	Eudicella smithi	Eudicella	Cetoniinae	Scarabaeidae	Scarabaeoidea	Neoptera	N/A
rrnL	-	1284	41.9	6.7	36.2	15.2	78.1	21.9	57.1	-0.073	0.388	Eudicella smithi	Eudicella	Cetoniinae	Scarabaeidae	Scarabaeoidea	Neoptera	N/A
rrnS	-	784	40.4	7.8	36	15.8	76.4	23.6	56.2	-0.058	0.341	Eudicella smithi	Eudicella	Cetoniinae	Scarabaeidae	Scarabaeoidea	Neoptera	N/A
Full genome	+	18699	37.2	16.2	38.3	8.3	75.5	24.5	45.5	0.015	-0.323	Goliathus goliatus	Goliathus	Cetoniinae	Scarabaeidae	Scarabaeoidea	Neoptera	N/A
PCGs	+	6843	39.8	17.6	31.4	11.2	71.2	28.8	51	-0.118	-0.223	Goliathus goliatus	Goliathus	Cetoniinae	Scarabaeidae	Scarabaeoidea	Neoptera	N/A
PCGs	-	4293	46.6	7.7	31	14.7	77.6	22.4	61.3	-0.202	0.311	Goliathus goliatus	Goliathus	Cetoniinae	Scarabaeidae	Scarabaeoidea	Neoptera	N/A
tRNAs	+	919	36.7	12.8	39	11.5	75.7	24.3	48.2	0.03	-0.054	Goliathus goliatus	Goliathus	Cetoniinae	Scarabaeidae	Scarabaeoidea	Neoptera	N/A
tRNAs	-	530	40	7.4	36	16.6	76	24	56.6	-0.052	0.386	Goliathus goliatus	Goliathus	Cetoniinae	Scarabaeidae	Scarabaeoidea	Neoptera	N/A
rRNAs	-	2065	39.3	6.4	37.8	16.4	77.1	22.8	55.7	-0.019	0.436	Goliathus goliatus	Goliathus	Cetoniinae	Scarabaeidae	Scarabaeoidea	Neoptera	N/A
1st codon position	+	2281	28.5	17.8	35.6	18.1	64.1	35.9	46.6	0.112	0.006	Goliathus goliatus	Goliathus	Cetoniinae	Scarabaeidae	Scarabaeoidea	Neoptera	N/A
1st codon position	-	1431	42.4	7.3	32.3	18	74.7	25.3	60.4	-0.136	0.425	Goliathus goliatus	Goliathus	Cetoniinae	Scarabaeidae	Scarabaeoidea	Neoptera	N/A
2nd codon position	+	2281	45.2	21.2	20.3	13.3	65.5	34.5	58.5	-0.379	-0.229	Goliathus goliatus	Goliathus	Cetoniinae	Scarabaeidae	Scarabaeoidea	Neoptera	N/A
2nd codon position	-	1431	49.3	14.5	20.3	15.9	69.6	30.4	65.2	-0.418	0.044	Goliathus goliatus	Goliathus	Cetoniinae	Scarabaeidae	Scarabaeoidea	Neoptera	N/A
3rd codon position	+	2281	45.7	13.9	38.1	2.3	83.8	16.2	48	-0.09	-0.718	Goliathus goliatus	Goliathus	Cetoniinae	Scarabaeidae	Scarabaeoidea	Neoptera	N/A
3rd codon position	-	1431	48.1	1.3	40.4	10.1	88.5	11.4	58.2	-0.088	0.768	Goliathus goliatus	Goliathus	Cetoniinae	Scarabaeidae	Scarabaeoidea	Neoptera	N/A
atp6	+	675	39.7	19.6	30.4	10.4	70.1	30	50.1	-0.133	-0.307	Goliathus goliatus	Goliathus	Cetoniinae	Scarabaeidae	Scarabaeoidea	Neoptera	N/A
atp8	+	156	45.5	12.8	35.9	5.8	81.4	18.6	51.3	-0.118	-0.379	Goliathus goliatus	Goliathus	Cetoniinae	Scarabaeidae	Scarabaeoidea	Neoptera	N/A
cox1	+	1531	38.4	18.5	28.2	14.9	66.6	33.4	53.3	-0.154	-0.109	Goliathus goliatus	Goliathus	Cetoniinae	Scarabaeidae	Scarabaeoidea	Neoptera	N/A
cox2	+	688	37.5	17.9	32.4	12.2	69.9	30.1	49.7	-0.073	-0.188	Goliathus goliatus	Goliathus	Cetoniinae	Scarabaeidae	Scarabaeoidea	Neoptera	N/A
cox3	+	787	39.1	18.6	29.2	13.1	68.3	31.7	52.2	-0.145	-0.173	Goliathus goliatus	Goliathus	Cetoniinae	Scarabaeidae	Scarabaeoidea	Neoptera	N/A
cyt b	+	1143	39.7	18.7	30	11.5	69.7	30.2	51.2	-0.139	-0.237	Goliathus goliatus	Goliathus	Cetoniinae	Scarabaeidae	Scarabaeoidea	Neoptera	N/A
nad1	-	951	47.1	8	28.2	16.7	75.3	24.7	63.8	-0.251	0.353	Goliathus goliatus	Goliathus	Cetoniinae	Scarabaeidae	Scarabaeoidea	Neoptera	N/A
nad2	+	1008	40.7	16.2	35.9	7.2	76.6	23.4	47.9	-0.062	-0.381	Goliathus goliatus	Goliathus	Cetoniinae	Scarabaeidae	Scarabaeoidea	Neoptera	N/A
nad3	+	354	41.8	15.8	32.2	10.2	74	26	52	-0.13	-0.217	Goliathus goliatus	Goliathus	Cetoniinae	Scarabaeidae	Scarabaeoidea	Neoptera	N/A
nad4	-	1338	47.1	7.2	30.8	14.9	77.9	22.1	62	-0.209	0.345	Goliathus goliatus	Goliathus	Cetoniinae	Scarabaeidae	Scarabaeoidea	Neoptera	N/A
nad4L	-	288	50	5.2	31.2	13.5	81.2	18.7	63.5	-0.231	0.444	Goliathus goliatus	Goliathus	Cetoniinae	Scarabaeidae	Scarabaeoidea	Neoptera	N/A
nad5	-	1716	45.5	8.3	32.6	13.6	78.1	21.9	59.1	-0.164	0.239	Goliathus goliatus	Goliathus	Cetoniinae	Scarabaeidae	Scarabaeoidea	Neoptera	N/A
nad6	+	504	43.7	13.7	36.3	6.3	80	20	50	-0.092	-0.366	Goliathus goliatus	Goliathus	Cetoniinae	Scarabaeidae	Scarabaeoidea	Neoptera	N/A
rrnL	-	1281	39.8	5.8	38.6	15.8	78.4	21.6	55.6	-0.016	0.466	Goliathus goliatus	Goliathus	Cetoniinae	Scarabaeidae	Scarabaeoidea	Neoptera	N/A
rrnS	-	784	38.5	7.5	36.6	17.3	75.1	24.8	55.8	-0.025	0.395	Goliathus goliatus	Goliathus	Cetoniinae	Scarabaeidae	Scarabaeoidea	Neoptera	N/A
Full genome	+	19468	34.2	18.3	37.6	9.9	71.8	28.2	44.1	0.046	-0.3	Jumnos ruckeri	Jumnos	Cetoniinae	Scarabaeidae	Scarabaeoidea	Neoptera	N/A
PCGs	+	6843	37.6	18.7	31.2	12.4	68.8	31.1	50	-0.093	-0.205	Jumnos ruckeri	Jumnos	Cetoniinae	Scarabaeidae	Scarabaeoidea	Neoptera	N/A
PCGs	-	4296	46.2	9	28.9	16	75.1	25	62.2	-0.231	0.282	Jumnos ruckeri	Jumnos	Cetoniinae	Scarabaeidae	Scarabaeoidea	Neoptera	N/A
tRNAs	+	925	35.9	13	38.1	13.1	74	26.1	49	0.029	0.004	Jumnos ruckeri	Jumnos	Cetoniinae	Scarabaeidae	Scarabaeoidea	Neoptera	N/A
tRNAs	-	523	38	8.2	36.3	17.4	74.3	25.6	55.4	-0.023	0.358	Jumnos ruckeri	Jumnos	Cetoniinae	Scarabaeidae	Scarabaeoidea	Neoptera	N/A
rRNAs	-	2067	41.7	6.8	35.3	16.3	77	23.1	58	-0.083	0.409	Jumnos ruckeri	Jumnos	Cetoniinae	Scarabaeidae	Scarabaeoidea	Neoptera	N/A
1st codon position	+	2281	28.7	17.4	35.6	18.3	64.3	35.7	47	0.107	0.025	Jumnos ruckeri	Jumnos	Cetoniinae	Scarabaeidae	Scarabaeoidea	Neoptera	N/A
1st codon position	-	1432	42.1	7.6	31.1	19.2	73.2	26.8	61.3	-0.151	0.432	Jumnos ruckeri	Jumnos	Cetoniinae	Scarabaeidae	Scarabaeoidea	Neoptera	N/A
2nd codon position	+	2281	44.9	21.5	20.2	13.4	65.1	34.9	58.3	-0.379	-0.231	Jumnos ruckeri	Jumnos	Cetoniinae	Scarabaeidae	Scarabaeoidea	Neoptera	N/A
2nd codon position	-	1432	49	15.1	19.9	16.1	68.9	31.2	65.1	-0.422	0.031	Jumnos ruckeri	Jumnos	Cetoniinae	Scarabaeidae	Scarabaeoidea	Neoptera	N/A
3rd codon position	+	2281	39.3	17.3	38	5.4	77.3	22.7	44.7	-0.018	-0.525	Jumnos ruckeri	Jumnos	Cetoniinae	Scarabaeidae	Scarabaeoidea	Neoptera	N/A
3rd codon position	-	1432	47.4	4.2	35.6	12.8	83	17	60.2	-0.142	0.506	Jumnos ruckeri	Jumnos	Cetoniinae	Scarabaeidae	Scarabaeoidea	Neoptera	N/A
atp6	+	675	38.8	19.1	31	11.1	69.8	30.2	49.9	-0.113	-0.265	Jumnos ruckeri	Jumnos	Cetoniinae	Scarabaeidae	Scarabaeoidea	Neoptera	N/A
atp8	+	156	42.3	16.7	34	7.1	76.3	23.8	49.4	-0.109	-0.405	Jumnos ruckeri	Jumnos	Cetoniinae	Scarabaeidae	Scarabaeoidea	Neoptera	N/A
cox1	+	1531	34.9	20.6	28.1	16.4	63	37	51.3	-0.108	-0.115	Jumnos ruckeri	Jumnos	Cetoniinae	Scarabaeidae	Scarabaeoidea	Neoptera	N/A
cox2	+	688	34.3	19.3	33.3	13.1	67.6	32.4	47.4	-0.015	-0.193	Jumnos ruckeri	Jumnos	Cetoniinae	Scarabaeidae	Scarabaeoidea	Neoptera	N/A
cox3	+	787	37.9	18.9	28.7	14.5	66.6	33.4	52.4	-0.137	-0.133	Jumnos ruckeri	Jumnos	Cetoniinae	Scarabaeidae	Scarabaeoidea	Neoptera	N/A
cyt b	+	1143	38.4	18.9	30	12.7	68.4	31.6	51.1	-0.123	-0.197	Jumnos ruckeri	Jumnos	Cetoniinae	Scarabaeidae	Scarabaeoidea	Neoptera	N/A
nad1	-	951	46	8.4	28.2	17.5	74.2	25.9	63.5	-0.24	0.35	Jumnos ruckeri	Jumnos	Cetoniinae	Scarabaeidae	Scarabaeoidea	Neoptera	N/A
nad2	+	1008	37.9	18.6	34.8	8.7	72.7	27.3	46.6	-0.042	-0.36	Jumnos ruckeri	Jumnos	Cetoniinae	Scarabaeidae	Scarabaeoidea	Neoptera	N/A
nad3	+	354	45.2	13.8	30.5	10.5	75.7	24.3	55.7	-0.194	-0.14	Jumnos ruckeri	Jumnos	Cetoniinae	Scarabaeidae	Scarabaeoidea	Neoptera	N/A
nad4	-	1338	47.2	8.6	28.6	15.5	75.8	24.1	62.7	-0.245	0.288	Jumnos ruckeri	Jumnos	Cetoniinae	Scarabaeidae	Scarabaeoidea	Neoptera	N/A
nad4L	-	291	53.3	5.8	27.8	13.1	81.1	18.9	66.4	-0.314	0.382	Jumnos ruckeri	Jumnos	Cetoniinae	Scarabaeidae	Scarabaeoidea	Neoptera	N/A
nad5	-	1716	44.2	10.1	29.6	16.1	73.8	26.2	60.3	-0.198	0.229	Jumnos ruckeri	Jumnos	Cetoniinae	Scarabaeidae	Scarabaeoidea	Neoptera	N/A
nad6	+	504	39.9	15.5	37.5	7.1	77.4	22.6	47	-0.031	-0.368	Jumnos ruckeri	Jumnos	Cetoniinae	Scarabaeidae	Scarabaeoidea	Neoptera	N/A
rrnL	-	1283	42.9	6.2	35.2	15.7	78.1	21.9	58.6	-0.098	0.438	Jumnos ruckeri	Jumnos	Cetoniinae	Scarabaeidae	Scarabaeoidea	Neoptera	N/A
rrnS	-	784	39.7	7.9	35.3	17.1	75	25	56.8	-0.058	0.367	Jumnos ruckeri	Jumnos	Cetoniinae	Scarabaeidae	Scarabaeoidea	Neoptera	N/A
Full genome	+	16422	37	15.8	38.2	8.9	75.2	24.7	45.9	0.016	-0.278	Mecynorhina polyphemus	Mecynorhina	Cetoniinae	Scarabaeidae	Scarabaeoidea	Neoptera	N/A
PCGs	+	6843	39.7	17.4	31.7	11.1	71.4	28.5	50.8	-0.112	-0.221	Mecynorhina polyphemus	Mecynorhina	Cetoniinae	Scarabaeidae	Scarabaeoidea	Neoptera	N/A
PCGs	-	4293	46	7.9	30.7	15.3	76.7	23.2	61.3	-0.2	0.317	Mecynorhina polyphemus	Mecynorhina	Cetoniinae	Scarabaeidae	Scarabaeoidea	Neoptera	N/A
tRNAs	+	919	34.9	13.6	39.4	12.1	74.3	25.7	47	0.06	-0.059	Mecynorhina polyphemus	Mecynorhina	Cetoniinae	Scarabaeidae	Scarabaeoidea	Neoptera	N/A
tRNAs	-	526	39.2	8.2	35.7	16.9	74.9	25.1	56.1	-0.046	0.348	Mecynorhina polyphemus	Mecynorhina	Cetoniinae	Scarabaeidae	Scarabaeoidea	Neoptera	N/A
rRNAs	-	2068	39.8	7.1	37.1	16.1	76.9	23.2	55.9	-0.035	0.389	Mecynorhina polyphemus	Mecynorhina	Cetoniinae	Scarabaeidae	Scarabaeoidea	Neoptera	N/A
1st codon position	+	2281	29.1	17.3	35.4	18.3	64.5	35.6	47.4	0.098	0.028	Mecynorhina polyphemus	Mecynorhina	Cetoniinae	Scarabaeidae	Scarabaeoidea	Neoptera	N/A
1st codon position	-	1431	41.7	7.3	31.7	19.3	73.4	26.6	61	-0.136	0.453	Mecynorhina polyphemus	Mecynorhina	Cetoniinae	Scarabaeidae	Scarabaeoidea	Neoptera	N/A
2nd codon position	+	2281	45	21.4	20.4	13.2	65.4	34.6	58.2	-0.375	-0.237	Mecynorhina polyphemus	Mecynorhina	Cetoniinae	Scarabaeidae	Scarabaeoidea	Neoptera	N/A
2nd codon position	-	1431	48.5	14.7	20.8	15.9	69.3	30.6	64.4	-0.399	0.039	Mecynorhina polyphemus	Mecynorhina	Cetoniinae	Scarabaeidae	Scarabaeoidea	Neoptera	N/A
3rd codon position	+	2281	45.2	13.6	39.3	1.9	84.5	15.5	47.1	-0.069	-0.757	Mecynorhina polyphemus	Mecynorhina	Cetoniinae	Scarabaeidae	Scarabaeoidea	Neoptera	N/A
3rd codon position	-	1431	47.9	1.8	39.6	10.8	87.5	12.6	58.7	-0.095	0.711	Mecynorhina polyphemus	Mecynorhina	Cetoniinae	Scarabaeidae	Scarabaeoidea	Neoptera	N/A
atp6	+	675	39.4	18.2	31.6	10.8	71	29	50.2	-0.111	-0.255	Mecynorhina polyphemus	Mecynorhina	Cetoniinae	Scarabaeidae	Scarabaeoidea	Neoptera	N/A
atp8	+	156	42.9	14.7	37.2	5.1	80.1	19.8	48	-0.072	-0.484	Mecynorhina polyphemus	Mecynorhina	Cetoniinae	Scarabaeidae	Scarabaeoidea	Neoptera	N/A
cox1	+	1531	38.3	18.7	28.3	14.6	66.6	33.3	52.9	-0.15	-0.122	Mecynorhina polyphemus	Mecynorhina	Cetoniinae	Scarabaeidae	Scarabaeoidea	Neoptera	N/A
cox2	+	688	37.9	18.2	32.7	11.2	70.6	29.4	49.1	-0.074	-0.238	Mecynorhina polyphemus	Mecynorhina	Cetoniinae	Scarabaeidae	Scarabaeoidea	Neoptera	N/A
cox3	+	787	38.2	18.9	29.6	13.2	67.8	32.1	51.4	-0.127	-0.178	Mecynorhina polyphemus	Mecynorhina	Cetoniinae	Scarabaeidae	Scarabaeoidea	Neoptera	N/A
cyt b	+	1143	40.4	17.6	30.7	11.3	71.1	28.9	51.7	-0.137	-0.218	Mecynorhina polyphemus	Mecynorhina	Cetoniinae	Scarabaeidae	Scarabaeoidea	Neoptera	N/A
nad1	-	951	46.5	8.7	28.1	16.7	74.6	25.4	63.2	-0.247	0.314	Mecynorhina polyphemus	Mecynorhina	Cetoniinae	Scarabaeidae	Scarabaeoidea	Neoptera	N/A
nad2	+	1008	41.1	15	36.2	7.7	77.3	22.7	48.8	-0.063	-0.319	Mecynorhina polyphemus	Mecynorhina	Cetoniinae	Scarabaeidae	Scarabaeoidea	Neoptera	N/A
nad3	+	354	43.2	16.4	30.5	9.9	73.7	26.3	53.1	-0.172	-0.247	Mecynorhina polyphemus	Mecynorhina	Cetoniinae	Scarabaeidae	Scarabaeoidea	Neoptera	N/A
nad4	-	1338	46.7	7.5	31.4	14.4	78.1	21.9	61.1	-0.196	0.317	Mecynorhina polyphemus	Mecynorhina	Cetoniinae	Scarabaeidae	Scarabaeoidea	Neoptera	N/A
nad4L	-	288	46.5	5.6	30.9	17	77.4	22.6	63.5	-0.202	0.508	Mecynorhina polyphemus	Mecynorhina	Cetoniinae	Scarabaeidae	Scarabaeoidea	Neoptera	N/A
nad5	-	1716	45.2	8.3	31.6	15	76.8	23.3	60.2	-0.177	0.288	Mecynorhina polyphemus	Mecynorhina	Cetoniinae	Scarabaeidae	Scarabaeoidea	Neoptera	N/A
nad6	+	504	41.9	15.3	36.3	6.5	78.2	21.8	48.4	-0.071	-0.4	Mecynorhina polyphemus	Mecynorhina	Cetoniinae	Scarabaeidae	Scarabaeoidea	Neoptera	N/A
rrnL	-	1284	40.9	6.1	37.9	15.1	78.8	21.2	56	-0.038	0.426	Mecynorhina polyphemus	Mecynorhina	Cetoniinae	Scarabaeidae	Scarabaeoidea	Neoptera	N/A
rrnS	-	784	38	8.7	35.7	17.6	73.7	26.3	55.6	-0.031	0.34	Mecynorhina polyphemus	Mecynorhina	Cetoniinae	Scarabaeidae	Scarabaeoidea	Neoptera	N/A
Full genome	+	17192	37.4	15.9	38.2	8.6	75.6	24.5	46	0.011	-0.298	Mecynorhina torquata ugandensis	Mecynorhina	Cetoniinae	Scarabaeidae	Scarabaeoidea	Neoptera	N/A
PCGs	+	6843	39.8	17.6	31.4	11.2	71.2	28.8	51	-0.118	-0.223	Mecynorhina torquata ugandensis	Mecynorhina	Cetoniinae	Scarabaeidae	Scarabaeoidea	Neoptera	N/A
PCGs	-	4293	46.6	7.7	31	14.7	77.6	22.4	61.3	-0.202	0.311	Mecynorhina torquata ugandensis	Mecynorhina	Cetoniinae	Scarabaeidae	Scarabaeoidea	Neoptera	N/A
tRNAs	+	855	36.5	13	38.8	11.7	75.3	24.7	48.2	0.031	-0.052	Mecynorhina torquata ugandensis	Mecynorhina	Cetoniinae	Scarabaeidae	Scarabaeoidea	Neoptera	N/A
tRNAs	-	530	40	7.4	36	16.6	76	24	56.6	-0.052	0.386	Mecynorhina torquata ugandensis	Mecynorhina	Cetoniinae	Scarabaeidae	Scarabaeoidea	Neoptera	N/A
rRNAs	-	2065	39.3	6.4	37.8	16.4	77.1	22.8	55.7	-0.019	0.436	Mecynorhina torquata ugandensis	Mecynorhina	Cetoniinae	Scarabaeidae	Scarabaeoidea	Neoptera	N/A
1st codon position	+	2281	28.5	17.8	35.6	18.1	64.1	35.9	46.6	0.112	0.006	Mecynorhina torquata ugandensis	Mecynorhina	Cetoniinae	Scarabaeidae	Scarabaeoidea	Neoptera	N/A
1st codon position	-	1431	42.4	7.3	32.3	18	74.7	25.3	60.4	-0.136	0.425	Mecynorhina torquata ugandensis	Mecynorhina	Cetoniinae	Scarabaeidae	Scarabaeoidea	Neoptera	N/A
2nd codon position	+	2281	45.2	21.2	20.3	13.3	65.5	34.5	58.5	-0.379	-0.229	Mecynorhina torquata ugandensis	Mecynorhina	Cetoniinae	Scarabaeidae	Scarabaeoidea	Neoptera	N/A
2nd codon position	-	1431	49.3	14.5	20.3	15.9	69.6	30.4	65.2	-0.418	0.044	Mecynorhina torquata ugandensis	Mecynorhina	Cetoniinae	Scarabaeidae	Scarabaeoidea	Neoptera	N/A
3rd codon position	+	2281	45.7	13.9	38.1	2.3	83.8	16.2	48	-0.09	-0.718	Mecynorhina torquata ugandensis	Mecynorhina	Cetoniinae	Scarabaeidae	Scarabaeoidea	Neoptera	N/A
3rd codon position	-	1431	48.1	1.3	40.4	10.1	88.5	11.4	58.2	-0.088	0.768	Mecynorhina torquata ugandensis	Mecynorhina	Cetoniinae	Scarabaeidae	Scarabaeoidea	Neoptera	N/A
atp6	+	675	39.7	19.6	30.4	10.4	70.1	30	50.1	-0.133	-0.307	Mecynorhina torquata ugandensis	Mecynorhina	Cetoniinae	Scarabaeidae	Scarabaeoidea	Neoptera	N/A
atp8	+	156	45.5	12.8	35.9	5.8	81.4	18.6	51.3	-0.118	-0.379	Mecynorhina torquata ugandensis	Mecynorhina	Cetoniinae	Scarabaeidae	Scarabaeoidea	Neoptera	N/A
cox1	+	1531	38.4	18.5	28.2	14.9	66.6	33.4	53.3	-0.154	-0.109	Mecynorhina torquata ugandensis	Mecynorhina	Cetoniinae	Scarabaeidae	Scarabaeoidea	Neoptera	N/A
cox2	+	688	37.5	17.9	32.4	12.2	69.9	30.1	49.7	-0.073	-0.188	Mecynorhina torquata ugandensis	Mecynorhina	Cetoniinae	Scarabaeidae	Scarabaeoidea	Neoptera	N/A
cox3	+	787	39.1	18.6	29.2	13.1	68.3	31.7	52.2	-0.145	-0.173	Mecynorhina torquata ugandensis	Mecynorhina	Cetoniinae	Scarabaeidae	Scarabaeoidea	Neoptera	N/A
cyt b	+	1143	39.7	18.7	30	11.5	69.7	30.2	51.2	-0.139	-0.237	Mecynorhina torquata ugandensis	Mecynorhina	Cetoniinae	Scarabaeidae	Scarabaeoidea	Neoptera	N/A
nad1	-	951	47.1	8	28.2	16.7	75.3	24.7	63.8	-0.251	0.353	Mecynorhina torquata ugandensis	Mecynorhina	Cetoniinae	Scarabaeidae	Scarabaeoidea	Neoptera	N/A
nad2	+	1008	40.7	16.2	35.9	7.2	76.6	23.4	47.9	-0.062	-0.381	Mecynorhina torquata ugandensis	Mecynorhina	Cetoniinae	Scarabaeidae	Scarabaeoidea	Neoptera	N/A
nad3	+	354	41.8	15.8	32.2	10.2	74	26	52	-0.13	-0.217	Mecynorhina torquata ugandensis	Mecynorhina	Cetoniinae	Scarabaeidae	Scarabaeoidea	Neoptera	N/A
nad4	-	1338	47.1	7.2	30.8	14.9	77.9	22.1	62	-0.209	0.345	Mecynorhina torquata ugandensis	Mecynorhina	Cetoniinae	Scarabaeidae	Scarabaeoidea	Neoptera	N/A
nad4L	-	288	50	5.2	31.2	13.5	81.2	18.7	63.5	-0.231	0.444	Mecynorhina torquata ugandensis	Mecynorhina	Cetoniinae	Scarabaeidae	Scarabaeoidea	Neoptera	N/A
nad5	-	1716	45.5	8.3	32.6	13.6	78.1	21.9	59.1	-0.164	0.239	Mecynorhina torquata ugandensis	Mecynorhina	Cetoniinae	Scarabaeidae	Scarabaeoidea	Neoptera	N/A
nad6	+	504	43.7	13.7	36.3	6.3	80	20	50	-0.092	-0.366	Mecynorhina torquata ugandensis	Mecynorhina	Cetoniinae	Scarabaeidae	Scarabaeoidea	Neoptera	N/A
rrnL	-	1281	39.8	5.8	38.6	15.8	78.4	21.6	55.6	-0.016	0.466	Mecynorhina torquata ugandensis	Mecynorhina	Cetoniinae	Scarabaeidae	Scarabaeoidea	Neoptera	N/A
rrnS	-	784	38.5	7.5	36.6	17.3	75.1	24.8	55.8	-0.025	0.395	Mecynorhina torquata ugandensis	Mecynorhina	Cetoniinae	Scarabaeidae	Scarabaeoidea	Neoptera	N/A
Full genome	+	16955	35.2	16	39.8	9	75	25	44.2	0.062	-0.278	Protaetia speciosa jousselini	Protaetia	Cetoniinae	Scarabaeidae	Scarabaeoidea	Neoptera	N/A
PCGs	+	6843	37.7	17.4	33.7	11.2	71.4	28.6	48.9	-0.056	-0.216	Protaetia speciosa jousselini	Protaetia	Cetoniinae	Scarabaeidae	Scarabaeoidea	Neoptera	N/A
PCGs	-	4293	47.3	8	29.1	15.6	76.4	23.6	62.9	-0.238	0.32	Protaetia speciosa jousselini	Protaetia	Cetoniinae	Scarabaeidae	Scarabaeoidea	Neoptera	N/A
tRNAs	+	860	35.7	13.3	40.1	10.9	75.8	24.2	46.6	0.058	-0.096	Protaetia speciosa jousselini	Protaetia	Cetoniinae	Scarabaeidae	Scarabaeoidea	Neoptera	N/A
tRNAs	-	591	38.7	9.1	36.2	15.9	74.9	25	54.6	-0.034	0.27	Protaetia speciosa jousselini	Protaetia	Cetoniinae	Scarabaeidae	Scarabaeoidea	Neoptera	N/A
rRNAs	-	2068	41.4	7	36.1	15.5	77.5	22.5	56.9	-0.069	0.378	Protaetia speciosa jousselini	Protaetia	Cetoniinae	Scarabaeidae	Scarabaeoidea	Neoptera	N/A
1st codon position	+	2281	29.9	16	35.9	18.2	65.8	34.2	48.1	0.091	0.063	Protaetia speciosa jousselini	Protaetia	Cetoniinae	Scarabaeidae	Scarabaeoidea	Neoptera	N/A
1st codon position	-	1431	42.1	7.4	31.2	19.4	73.3	26.8	61.5	-0.149	0.446	Protaetia speciosa jousselini	Protaetia	Cetoniinae	Scarabaeidae	Scarabaeoidea	Neoptera	N/A
2nd codon position	+	2281	45	21.4	20.3	13.2	65.3	34.6	58.2	-0.377	-0.236	Protaetia speciosa jousselini	Protaetia	Cetoniinae	Scarabaeidae	Scarabaeoidea	Neoptera	N/A
2nd codon position	-	1431	48.8	15	20.5	15.7	69.3	30.7	64.5	-0.409	0.021	Protaetia speciosa jousselini	Protaetia	Cetoniinae	Scarabaeidae	Scarabaeoidea	Neoptera	N/A
3rd codon position	+	2281	38.2	14.7	44.8	2.2	83	16.9	40.4	0.08	-0.736	Protaetia speciosa jousselini	Protaetia	Cetoniinae	Scarabaeidae	Scarabaeoidea	Neoptera	N/A
3rd codon position	-	1431	50.9	1.7	35.6	11.7	86.5	13.4	62.6	-0.177	0.75	Protaetia speciosa jousselini	Protaetia	Cetoniinae	Scarabaeidae	Scarabaeoidea	Neoptera	N/A
atp6	+	675	38.7	16.7	34.2	10.2	72.9	26.9	48.9	-0.061	-0.242	Protaetia speciosa jousselini	Protaetia	Cetoniinae	Scarabaeidae	Scarabaeoidea	Neoptera	N/A
atp8	+	156	35.9	19.9	37.2	7.1	73.1	27	43	0.018	-0.476	Protaetia speciosa jousselini	Protaetia	Cetoniinae	Scarabaeidae	Scarabaeoidea	Neoptera	N/A
cox1	+	1531	35.3	19.1	30.4	15.2	65.7	34.3	50.5	-0.075	-0.114	Protaetia speciosa jousselini	Protaetia	Cetoniinae	Scarabaeidae	Scarabaeoidea	Neoptera	N/A
cox2	+	688	35.8	17	34.9	12.4	70.7	29.4	48.2	-0.012	-0.158	Protaetia speciosa jousselini	Protaetia	Cetoniinae	Scarabaeidae	Scarabaeoidea	Neoptera	N/A
cox3	+	787	37.2	18.2	31.3	13.3	68.5	31.5	50.5	-0.087	-0.153	Protaetia speciosa jousselini	Protaetia	Cetoniinae	Scarabaeidae	Scarabaeoidea	Neoptera	N/A
cyt b	+	1143	37.7	18.3	32.5	11.5	70.2	29.8	49.2	-0.073	-0.229	Protaetia speciosa jousselini	Protaetia	Cetoniinae	Scarabaeidae	Scarabaeoidea	Neoptera	N/A
nad1	-	951	48.2	7.9	26.9	17	75.1	24.9	65.2	-0.283	0.367	Protaetia speciosa jousselini	Protaetia	Cetoniinae	Scarabaeidae	Scarabaeoidea	Neoptera	N/A
nad2	+	1008	38.6	17.3	37	7.1	75.6	24.4	45.7	-0.021	-0.415	Protaetia speciosa jousselini	Protaetia	Cetoniinae	Scarabaeidae	Scarabaeoidea	Neoptera	N/A
nad3	+	354	42.1	13.8	35	9	77.1	22.8	51.1	-0.092	-0.21	Protaetia speciosa jousselini	Protaetia	Cetoniinae	Scarabaeidae	Scarabaeoidea	Neoptera	N/A
nad4	-	1336	47.1	8.1	29.3	15.5	76.4	23.6	62.6	-0.232	0.314	Protaetia speciosa jousselini	Protaetia	Cetoniinae	Scarabaeidae	Scarabaeoidea	Neoptera	N/A
nad4L	-	291	52.6	6.5	27.1	13.7	79.7	20.2	66.3	-0.319	0.356	Protaetia speciosa jousselini	Protaetia	Cetoniinae	Scarabaeidae	Scarabaeoidea	Neoptera	N/A
nad5	-	1716	46.1	8.3	30.4	15.2	76.5	23.5	61.3	-0.205	0.29	Protaetia speciosa jousselini	Protaetia	Cetoniinae	Scarabaeidae	Scarabaeoidea	Neoptera	N/A
nad6	+	504	42.9	12.3	38.9	6	81.8	18.3	48.9	-0.049	-0.348	Protaetia speciosa jousselini	Protaetia	Cetoniinae	Scarabaeidae	Scarabaeoidea	Neoptera	N/A
rrnL	-	1284	41.7	6.5	36.3	15.4	78	21.9	57.1	-0.07	0.404	Protaetia speciosa jousselini	Protaetia	Cetoniinae	Scarabaeidae	Scarabaeoidea	Neoptera	N/A
rrnS	-	784	40.8	7.8	35.7	15.7	76.5	23.5	56.5	-0.067	0.337	Protaetia speciosa jousselini	Protaetia	Cetoniinae	Scarabaeidae	Scarabaeoidea	Neoptera	N/A
Full genome	+	19444	36.3	15.3	39.9	8.3	76.2	23.6	44.6	0.047	-0.295	Chalcosoma caucasus caucasus	Chalcosoma	Dynastinae	Scarabaeidae	Scarabaeoidea	Neoptera	N/A
PCGs	+	6840	39.2	15.7	34.3	10.8	73.5	26.5	50	-0.066	-0.183	Chalcosoma caucasus caucasus	Chalcosoma	Dynastinae	Scarabaeidae	Scarabaeoidea	Neoptera	N/A
PCGs	-	4293	47.5	7.7	30.5	14.3	78	22	61.8	-0.219	0.304	Chalcosoma caucasus caucasus	Chalcosoma	Dynastinae	Scarabaeidae	Scarabaeoidea	Neoptera	N/A
tRNAs	+	922	36.4	11.7	40	11.8	76.4	23.5	48.2	0.047	0.005	Chalcosoma caucasus caucasus	Chalcosoma	Dynastinae	Scarabaeidae	Scarabaeoidea	Neoptera	N/A
tRNAs	-	524	36.8	7.6	37.6	17.9	74.4	25.5	54.7	0.01	0.403	Chalcosoma caucasus caucasus	Chalcosoma	Dynastinae	Scarabaeidae	Scarabaeoidea	Neoptera	N/A
rRNAs	-	2068	39.4	7.4	36.6	16.6	76	24	56	-0.037	0.382	Chalcosoma caucasus caucasus	Chalcosoma	Dynastinae	Scarabaeidae	Scarabaeoidea	Neoptera	N/A
1st codon position	+	2280	31.1	14.8	36.4	17.7	67.5	32.5	48.8	0.08	0.088	Chalcosoma caucasus caucasus	Chalcosoma	Dynastinae	Scarabaeidae	Scarabaeoidea	Neoptera	N/A
1st codon position	-	1431	43.2	7.1	30.8	18.9	74	26	62.1	-0.167	0.457	Chalcosoma caucasus caucasus	Chalcosoma	Dynastinae	Scarabaeidae	Scarabaeoidea	Neoptera	N/A
2nd codon position	+	2280	44.9	21.3	20.7	13.1	65.6	34.4	58	-0.37	-0.238	Chalcosoma caucasus caucasus	Chalcosoma	Dynastinae	Scarabaeidae	Scarabaeoidea	Neoptera	N/A
2nd codon position	-	1431	49.5	14.3	20.8	15.5	70.3	29.8	65	-0.409	0.042	Chalcosoma caucasus caucasus	Chalcosoma	Dynastinae	Scarabaeidae	Scarabaeoidea	Neoptera	N/A
3rd codon position	+	2280	41.6	10.9	45.9	1.7	87.5	12.6	43.3	0.049	-0.734	Chalcosoma caucasus caucasus	Chalcosoma	Dynastinae	Scarabaeidae	Scarabaeoidea	Neoptera	N/A
3rd codon position	-	1431	49.9	1.7	39.8	8.6	89.7	10.3	58.5	-0.112	0.673	Chalcosoma caucasus caucasus	Chalcosoma	Dynastinae	Scarabaeidae	Scarabaeoidea	Neoptera	N/A
atp6	+	672	39.3	16.7	33.8	10.3	73.1	27	49.6	-0.075	-0.238	Chalcosoma caucasus caucasus	Chalcosoma	Dynastinae	Scarabaeidae	Scarabaeoidea	Neoptera	N/A
atp8	+	156	43.6	14.1	36.5	5.8	80.1	19.9	49.4	-0.088	-0.419	Chalcosoma caucasus caucasus	Chalcosoma	Dynastinae	Scarabaeidae	Scarabaeoidea	Neoptera	N/A
cox1	+	1531	38	15.4	32.2	14.4	70.2	29.8	52.4	-0.083	-0.035	Chalcosoma caucasus caucasus	Chalcosoma	Dynastinae	Scarabaeidae	Scarabaeoidea	Neoptera	N/A
cox2	+	688	37.6	15.8	34.9	11.6	72.5	27.4	49.2	-0.038	-0.153	Chalcosoma caucasus caucasus	Chalcosoma	Dynastinae	Scarabaeidae	Scarabaeoidea	Neoptera	N/A
cox3	+	787	37.4	16.9	31.6	14.1	69	31	51.5	-0.083	-0.09	Chalcosoma caucasus caucasus	Chalcosoma	Dynastinae	Scarabaeidae	Scarabaeoidea	Neoptera	N/A
cyt b	+	1143	39.5	15.7	34	10.8	73.5	26.5	50.3	-0.074	-0.182	Chalcosoma caucasus caucasus	Chalcosoma	Dynastinae	Scarabaeidae	Scarabaeoidea	Neoptera	N/A
nad1	-	951	47.3	8	28.3	16.4	75.6	24.4	63.7	-0.252	0.345	Chalcosoma caucasus caucasus	Chalcosoma	Dynastinae	Scarabaeidae	Scarabaeoidea	Neoptera	N/A
nad2	+	1008	40.7	13.8	38.8	6.7	79.5	20.5	47.4	-0.024	-0.343	Chalcosoma caucasus caucasus	Chalcosoma	Dynastinae	Scarabaeidae	Scarabaeoidea	Neoptera	N/A
nad3	+	354	42.1	17.5	31.9	8.5	74	26	50.6	-0.137	-0.348	Chalcosoma caucasus caucasus	Chalcosoma	Dynastinae	Scarabaeidae	Scarabaeoidea	Neoptera	N/A
nad4	-	1338	48.1	7.9	30.3	13.7	78.4	21.6	61.8	-0.228	0.266	Chalcosoma caucasus caucasus	Chalcosoma	Dynastinae	Scarabaeidae	Scarabaeoidea	Neoptera	N/A
nad4L	-	291	51.5	5.5	29.9	13.1	81.4	18.6	64.6	-0.266	0.407	Chalcosoma caucasus caucasus	Chalcosoma	Dynastinae	Scarabaeidae	Scarabaeoidea	Neoptera	N/A
nad5	-	1714	46.5	7.6	31.9	13.9	78.4	21.5	60.4	-0.186	0.292	Chalcosoma caucasus caucasus	Chalcosoma	Dynastinae	Scarabaeidae	Scarabaeoidea	Neoptera	N/A
nad6	+	504	40.9	15.9	37.5	5.8	78.4	21.7	46.7	-0.043	-0.468	Chalcosoma caucasus caucasus	Chalcosoma	Dynastinae	Scarabaeidae	Scarabaeoidea	Neoptera	N/A
rrnL	-	1284	40.3	7	37.3	15.4	77.6	22.4	55.7	-0.038	0.375	Chalcosoma caucasus caucasus	Chalcosoma	Dynastinae	Scarabaeidae	Scarabaeoidea	Neoptera	N/A
rrnS	-	784	37.9	8.2	35.3	18.6	73.2	26.8	56.5	-0.035	0.39	Chalcosoma caucasus caucasus	Chalcosoma	Dynastinae	Scarabaeidae	Scarabaeoidea	Neoptera	N/A
Full genome	+	17813	31	21.3	36.1	11.4	67.1	32.7	42.4	0.076	-0.301	Dynastes hercules hercules	Dynastes	Dynastinae	Scarabaeidae	Scarabaeoidea	Neoptera	N/A
PCGs	+	6840	33.4	23	31.2	12.4	64.6	35.4	45.8	-0.035	-0.302	Dynastes hercules hercules	Dynastes	Dynastinae	Scarabaeidae	Scarabaeoidea	Neoptera	N/A
PCGs	-	4293	44.3	10.7	24.6	20.5	68.9	31.2	64.8	-0.286	0.314	Dynastes hercules hercules	Dynastes	Dynastinae	Scarabaeidae	Scarabaeoidea	Neoptera	N/A
tRNAs	+	916	33.4	14.3	40	12.3	73.4	26.6	45.7	0.089	-0.074	Dynastes hercules hercules	Dynastes	Dynastinae	Scarabaeidae	Scarabaeoidea	Neoptera	N/A
tRNAs	-	523	37.5	8.6	34.6	19.3	72.1	27.9	56.8	-0.04	0.384	Dynastes hercules hercules	Dynastes	Dynastinae	Scarabaeidae	Scarabaeoidea	Neoptera	N/A
rRNAs	-	2061	38.3	9.1	32.7	19.9	71	29	58.2	-0.08	0.375	Dynastes hercules hercules	Dynastes	Dynastinae	Scarabaeidae	Scarabaeoidea	Neoptera	N/A
1st codon position	+	2280	26.1	20.7	34.6	18.6	60.7	39.3	44.7	0.141	-0.052	Dynastes hercules hercules	Dynastes	Dynastinae	Scarabaeidae	Scarabaeoidea	Neoptera	N/A
1st codon position	-	1431	38.8	10.8	28.4	22.1	67.2	32.9	60.9	-0.155	0.345	Dynastes hercules hercules	Dynastes	Dynastinae	Scarabaeidae	Scarabaeoidea	Neoptera	N/A
2nd codon position	+	2280	44.6	22.1	20.1	13.2	64.7	35.3	57.8	-0.378	-0.254	Dynastes hercules hercules	Dynastes	Dynastinae	Scarabaeidae	Scarabaeoidea	Neoptera	N/A
2nd codon position	-	1431	48.8	14.8	19.9	16.5	68.7	31.3	65.3	-0.42	0.054	Dynastes hercules hercules	Dynastes	Dynastinae	Scarabaeidae	Scarabaeoidea	Neoptera	N/A
3rd codon position	+	2280	29.6	26.3	38.8	5.3	68.4	31.6	34.9	0.133	-0.667	Dynastes hercules hercules	Dynastes	Dynastinae	Scarabaeidae	Scarabaeoidea	Neoptera	N/A
3rd codon position	-	1431	45.3	6.4	25.5	22.8	70.8	29.2	68.1	-0.279	0.56	Dynastes hercules hercules	Dynastes	Dynastinae	Scarabaeidae	Scarabaeoidea	Neoptera	N/A
atp6	+	672	34.8	22.5	30.1	12.6	64.9	35.1	47.4	-0.073	-0.28	Dynastes hercules hercules	Dynastes	Dynastinae	Scarabaeidae	Scarabaeoidea	Neoptera	N/A
atp8	+	156	38.5	20.5	35.3	5.8	73.8	26.3	44.3	-0.043	-0.561	Dynastes hercules hercules	Dynastes	Dynastinae	Scarabaeidae	Scarabaeoidea	Neoptera	N/A
cox1	+	1531	32.1	23.1	29	15.9	61.1	39	48	-0.05	-0.185	Dynastes hercules hercules	Dynastes	Dynastinae	Scarabaeidae	Scarabaeoidea	Neoptera	N/A
cox2	+	688	32	21.7	33.1	13.2	65.1	34.9	45.2	0.018	-0.242	Dynastes hercules hercules	Dynastes	Dynastinae	Scarabaeidae	Scarabaeoidea	Neoptera	N/A
cox3	+	787	32.1	24.5	28.2	15.1	60.3	39.6	47.2	-0.065	-0.237	Dynastes hercules hercules	Dynastes	Dynastinae	Scarabaeidae	Scarabaeoidea	Neoptera	N/A
cyt b	+	1143	34	23.8	29.6	12.6	63.6	36.4	46.6	-0.07	-0.308	Dynastes hercules hercules	Dynastes	Dynastinae	Scarabaeidae	Scarabaeoidea	Neoptera	N/A
nad1	-	951	44.9	10.2	23.4	21.5	68.3	31.7	66.4	-0.314	0.355	Dynastes hercules hercules	Dynastes	Dynastinae	Scarabaeidae	Scarabaeoidea	Neoptera	N/A
nad2	+	1008	34.7	22.7	34.2	8.3	68.9	31	43	-0.007	-0.463	Dynastes hercules hercules	Dynastes	Dynastinae	Scarabaeidae	Scarabaeoidea	Neoptera	N/A
nad3	+	354	35.6	20.9	33.9	9.6	69.5	30.5	45.2	-0.024	-0.37	Dynastes hercules hercules	Dynastes	Dynastinae	Scarabaeidae	Scarabaeoidea	Neoptera	N/A
nad4	-	1338	43.9	11.6	23.9	20.6	67.8	32.2	64.5	-0.295	0.279	Dynastes hercules hercules	Dynastes	Dynastinae	Scarabaeidae	Scarabaeoidea	Neoptera	N/A
nad4L	-	291	48.1	7.9	24.4	19.6	72.5	27.5	67.7	-0.327	0.425	Dynastes hercules hercules	Dynastes	Dynastinae	Scarabaeidae	Scarabaeoidea	Neoptera	N/A
nad5	-	1714	43.6	10.7	25.8	20	69.4	30.7	63.6	-0.257	0.303	Dynastes hercules hercules	Dynastes	Dynastinae	Scarabaeidae	Scarabaeoidea	Neoptera	N/A
nad6	+	504	33.1	24.4	35.3	7.1	68.4	31.5	40.2	0.032	-0.547	Dynastes hercules hercules	Dynastes	Dynastinae	Scarabaeidae	Scarabaeoidea	Neoptera	N/A
rrnL	-	1276	39	8.9	32.2	19.8	71.2	28.7	58.8	-0.096	0.379	Dynastes hercules hercules	Dynastes	Dynastinae	Scarabaeidae	Scarabaeoidea	Neoptera	N/A
rrnS	-	785	37.2	9.3	33.4	20.1	70.6	29.4	57.3	-0.054	0.368	Dynastes hercules hercules	Dynastes	Dynastinae	Scarabaeidae	Scarabaeoidea	Neoptera	N/A
Full genome	+	16785	31.6	20	38.5	10	70.1	30	41.6	0.099	-0.334	Megasoma elephas elephas	Megasoma	Dynastinae	Scarabaeidae	Scarabaeoidea	Neoptera	N/A
PCGs	+	6840	34.3	21.4	32.7	11.6	67	33	45.9	-0.024	-0.296	Megasoma elephas elephas	Megasoma	Dynastinae	Scarabaeidae	Scarabaeoidea	Neoptera	N/A
PCGs	-	4293	46.4	8.9	24.8	19.8	71.2	28.7	66.2	-0.303	0.377	Megasoma elephas elephas	Megasoma	Dynastinae	Scarabaeidae	Scarabaeoidea	Neoptera	N/A
tRNAs	+	848	33.1	13.1	42.3	11.4	75.4	24.5	44.5	0.122	-0.067	Megasoma elephas elephas	Megasoma	Dynastinae	Scarabaeidae	Scarabaeoidea	Neoptera	N/A
tRNAs	-	588	36.7	10.7	34.5	18	71.2	28.7	54.7	-0.031	0.254	Megasoma elephas elephas	Megasoma	Dynastinae	Scarabaeidae	Scarabaeoidea	Neoptera	N/A
rRNAs	-	2060	40	8.3	32.7	19	72.7	27.3	59	-0.1	0.391	Megasoma elephas elephas	Megasoma	Dynastinae	Scarabaeidae	Scarabaeoidea	Neoptera	N/A
1st codon position	+	2280	26.8	20	34.9	18.4	61.7	38.4	45.2	0.131	-0.041	Megasoma elephas elephas	Megasoma	Dynastinae	Scarabaeidae	Scarabaeoidea	Neoptera	N/A
1st codon position	-	1431	40.1	8.8	29.1	21.9	69.2	30.7	62	-0.158	0.427	Megasoma elephas elephas	Megasoma	Dynastinae	Scarabaeidae	Scarabaeoidea	Neoptera	N/A
2nd codon position	+	2280	44.6	22.4	19.9	13	64.5	35.4	57.6	-0.383	-0.265	Megasoma elephas elephas	Megasoma	Dynastinae	Scarabaeidae	Scarabaeoidea	Neoptera	N/A
2nd codon position	-	1431	49.5	14.4	19.7	16.4	69.2	30.8	65.9	-0.431	0.064	Megasoma elephas elephas	Megasoma	Dynastinae	Scarabaeidae	Scarabaeoidea	Neoptera	N/A
3rd codon position	+	2280	31.5	21.7	43.4	3.4	74.9	25.1	34.9	0.159	-0.731	Megasoma elephas elephas	Megasoma	Dynastinae	Scarabaeidae	Scarabaeoidea	Neoptera	N/A
3rd codon position	-	1431	49.7	3.6	25.6	21	75.3	24.6	70.7	-0.319	0.705	Megasoma elephas elephas	Megasoma	Dynastinae	Scarabaeidae	Scarabaeoidea	Neoptera	N/A
atp6	+	672	33.5	23.4	32.4	10.7	65.9	34.1	44.2	-0.016	-0.371	Megasoma elephas elephas	Megasoma	Dynastinae	Scarabaeidae	Scarabaeoidea	Neoptera	N/A
atp8	+	156	40.4	19.9	34	5.8	74.4	25.7	46.2	-0.086	-0.55	Megasoma elephas elephas	Megasoma	Dynastinae	Scarabaeidae	Scarabaeoidea	Neoptera	N/A
cox1	+	1531	33.2	20.8	30.8	15.2	64	36	48.4	-0.039	-0.158	Megasoma elephas elephas	Megasoma	Dynastinae	Scarabaeidae	Scarabaeoidea	Neoptera	N/A
cox2	+	688	33.1	20.2	34.4	12.2	67.5	32.4	45.3	0.019	-0.247	Megasoma elephas elephas	Megasoma	Dynastinae	Scarabaeidae	Scarabaeoidea	Neoptera	N/A
cox3	+	787	33.5	22.5	29.7	14.2	63.2	36.7	47.7	-0.06	-0.225	Megasoma elephas elephas	Megasoma	Dynastinae	Scarabaeidae	Scarabaeoidea	Neoptera	N/A
cyt b	+	1143	33.9	22.2	32.2	11.6	66.1	33.8	45.5	-0.026	-0.313	Megasoma elephas elephas	Megasoma	Dynastinae	Scarabaeidae	Scarabaeoidea	Neoptera	N/A
nad1	-	951	46	8.7	23.6	21.8	69.6	30.5	67.8	-0.322	0.428	Megasoma elephas elephas	Megasoma	Dynastinae	Scarabaeidae	Scarabaeoidea	Neoptera	N/A
nad2	+	1008	36.5	19.4	36.1	7.9	72.6	27.3	44.4	-0.005	-0.42	Megasoma elephas elephas	Megasoma	Dynastinae	Scarabaeidae	Scarabaeoidea	Neoptera	N/A
nad3	+	354	34.5	22	33.1	10.5	67.6	32.5	45	-0.021	-0.357	Megasoma elephas elephas	Megasoma	Dynastinae	Scarabaeidae	Scarabaeoidea	Neoptera	N/A
nad4	-	1338	47.4	8.9	24.3	19.4	71.7	28.3	66.8	-0.322	0.372	Megasoma elephas elephas	Megasoma	Dynastinae	Scarabaeidae	Scarabaeoidea	Neoptera	N/A
nad4L	-	291	51.5	7.2	23.7	17.5	75.2	24.7	69	-0.37	0.417	Megasoma elephas elephas	Megasoma	Dynastinae	Scarabaeidae	Scarabaeoidea	Neoptera	N/A
nad5	-	1714	45.2	9.4	26.1	19.3	71.3	28.7	64.5	-0.267	0.346	Megasoma elephas elephas	Megasoma	Dynastinae	Scarabaeidae	Scarabaeoidea	Neoptera	N/A
nad6	+	504	36.3	21.8	35.1	6.7	71.4	28.5	43	-0.017	-0.528	Megasoma elephas elephas	Megasoma	Dynastinae	Scarabaeidae	Scarabaeoidea	Neoptera	N/A
rrnL	-	1275	41.6	7.6	32	18.8	73.6	26.4	60.4	-0.13	0.424	Megasoma elephas elephas	Megasoma	Dynastinae	Scarabaeidae	Scarabaeoidea	Neoptera	N/A
rrnS	-	785	37.5	9.4	33.9	19.2	71.4	28.6	56.7	-0.05	0.342	Megasoma elephas elephas	Megasoma	Dynastinae	Scarabaeidae	Scarabaeoidea	Neoptera	N/A
Full genome	+	16983	31.5	20.1	38.4	10	69.9	30.1	41.5	0.099	-0.336	Megasoma mars	Megasoma	Dynastinae	Scarabaeidae	Scarabaeoidea	Neoptera	N/A
PCGs	+	6840	34.3	21.4	32.7	11.6	67	33	45.9	-0.024	-0.296	Megasoma mars	Megasoma	Dynastinae	Scarabaeidae	Scarabaeoidea	Neoptera	N/A
PCGs	-	4293	46.4	8.9	24.8	19.8	71.2	28.7	66.2	-0.303	0.377	Megasoma mars	Megasoma	Dynastinae	Scarabaeidae	Scarabaeoidea	Neoptera	N/A
tRNAs	+	914	33.3	13.5	41.5	11.8	74.8	25.3	45.1	0.11	-0.065	Megasoma mars	Megasoma	Dynastinae	Scarabaeidae	Scarabaeoidea	Neoptera	N/A
tRNAs	-	521	37.6	10	34.4	18	72	28	55.6	-0.045	0.288	Megasoma mars	Megasoma	Dynastinae	Scarabaeidae	Scarabaeoidea	Neoptera	N/A
rRNAs	-	2057	39.9	8.3	32.8	19	72.7	27.3	58.9	-0.098	0.391	Megasoma mars	Megasoma	Dynastinae	Scarabaeidae	Scarabaeoidea	Neoptera	N/A
1st codon position	+	2280	26.8	20	34.9	18.4	61.7	38.4	45.2	0.131	-0.041	Megasoma mars	Megasoma	Dynastinae	Scarabaeidae	Scarabaeoidea	Neoptera	N/A
1st codon position	-	1431	40.1	8.8	29.1	21.9	69.2	30.7	62	-0.158	0.427	Megasoma mars	Megasoma	Dynastinae	Scarabaeidae	Scarabaeoidea	Neoptera	N/A
2nd codon position	+	2280	44.6	22.4	19.9	13	64.5	35.4	57.6	-0.383	-0.265	Megasoma mars	Megasoma	Dynastinae	Scarabaeidae	Scarabaeoidea	Neoptera	N/A
2nd codon position	-	1431	49.5	14.4	19.7	16.4	69.2	30.8	65.9	-0.431	0.064	Megasoma mars	Megasoma	Dynastinae	Scarabaeidae	Scarabaeoidea	Neoptera	N/A
3rd codon position	+	2280	31.5	21.7	43.4	3.4	74.9	25.1	34.9	0.159	-0.731	Megasoma mars	Megasoma	Dynastinae	Scarabaeidae	Scarabaeoidea	Neoptera	N/A
3rd codon position	-	1431	49.7	3.6	25.6	21	75.3	24.6	70.7	-0.319	0.705	Megasoma mars	Megasoma	Dynastinae	Scarabaeidae	Scarabaeoidea	Neoptera	N/A
atp6	+	672	33.5	23.4	32.4	10.7	65.9	34.1	44.2	-0.016	-0.371	Megasoma mars	Megasoma	Dynastinae	Scarabaeidae	Scarabaeoidea	Neoptera	N/A
atp8	+	156	40.4	19.9	34	5.8	74.4	25.7	46.2	-0.086	-0.55	Megasoma mars	Megasoma	Dynastinae	Scarabaeidae	Scarabaeoidea	Neoptera	N/A
cox1	+	1531	33.2	20.8	30.8	15.2	64	36	48.4	-0.039	-0.158	Megasoma mars	Megasoma	Dynastinae	Scarabaeidae	Scarabaeoidea	Neoptera	N/A
cox2	+	688	33.1	20.2	34.4	12.2	67.5	32.4	45.3	0.019	-0.247	Megasoma mars	Megasoma	Dynastinae	Scarabaeidae	Scarabaeoidea	Neoptera	N/A
cox3	+	787	33.5	22.5	29.7	14.2	63.2	36.7	47.7	-0.06	-0.225	Megasoma mars	Megasoma	Dynastinae	Scarabaeidae	Scarabaeoidea	Neoptera	N/A
cyt b	+	1143	33.9	22.2	32.2	11.6	66.1	33.8	45.5	-0.026	-0.313	Megasoma mars	Megasoma	Dynastinae	Scarabaeidae	Scarabaeoidea	Neoptera	N/A
nad1	-	951	46	8.7	23.6	21.8	69.6	30.5	67.8	-0.322	0.428	Megasoma mars	Megasoma	Dynastinae	Scarabaeidae	Scarabaeoidea	Neoptera	N/A
nad2	+	1008	36.5	19.4	36.1	7.9	72.6	27.3	44.4	-0.005	-0.42	Megasoma mars	Megasoma	Dynastinae	Scarabaeidae	Scarabaeoidea	Neoptera	N/A
nad3	+	354	34.5	22	33.1	10.5	67.6	32.5	45	-0.021	-0.357	Megasoma mars	Megasoma	Dynastinae	Scarabaeidae	Scarabaeoidea	Neoptera	N/A
nad4	-	1338	47.4	8.9	24.3	19.4	71.7	28.3	66.8	-0.322	0.372	Megasoma mars	Megasoma	Dynastinae	Scarabaeidae	Scarabaeoidea	Neoptera	N/A
nad4L	-	291	51.5	7.2	23.7	17.5	75.2	24.7	69	-0.37	0.417	Megasoma mars	Megasoma	Dynastinae	Scarabaeidae	Scarabaeoidea	Neoptera	N/A
nad5	-	1714	45.2	9.4	26.1	19.3	71.3	28.7	64.5	-0.267	0.346	Megasoma mars	Megasoma	Dynastinae	Scarabaeidae	Scarabaeoidea	Neoptera	N/A
nad6	+	504	36.3	21.8	35.1	6.7	71.4	28.5	43	-0.017	-0.528	Megasoma mars	Megasoma	Dynastinae	Scarabaeidae	Scarabaeoidea	Neoptera	N/A
rrnL	-	1275	41.6	7.6	32	18.8	73.6	26.4	60.4	-0.13	0.424	Megasoma mars	Megasoma	Dynastinae	Scarabaeidae	Scarabaeoidea	Neoptera	N/A
rrnS	-	782	37.2	9.5	34	19.3	71.2	28.8	56.5	-0.045	0.342	Megasoma mars	Megasoma	Dynastinae	Scarabaeidae	Scarabaeoidea	Neoptera	N/A
Full genome	+	20396	31.3	19.4	39	10.1	70.3	29.5	41.4	0.11	-0.315	Oryctes nasicornis	Oryctes	Dynastinae	Scarabaeidae	Scarabaeoidea	Neoptera	N/A
PCGs	+	6840	34.6	20.2	33.1	12	67.7	32.2	46.6	-0.022	-0.253	Oryctes nasicornis	Oryctes	Dynastinae	Scarabaeidae	Scarabaeoidea	Neoptera	N/A
PCGs	-	4293	48.3	8.9	24.1	18.7	72.4	27.6	67	-0.334	0.354	Oryctes nasicornis	Oryctes	Dynastinae	Scarabaeidae	Scarabaeoidea	Neoptera	N/A
tRNAs	+	917	34.4	13.6	39.8	12.2	74.2	25.8	46.6	0.074	-0.055	Oryctes nasicornis	Oryctes	Dynastinae	Scarabaeidae	Scarabaeoidea	Neoptera	N/A
tRNAs	-	522	38.7	8.2	35.4	17.6	74.1	25.8	56.3	-0.044	0.363	Oryctes nasicornis	Oryctes	Dynastinae	Scarabaeidae	Scarabaeoidea	Neoptera	N/A
rRNAs	-	2064	41.1	8.4	31.9	18.5	73	26.9	59.6	-0.126	0.374	Oryctes nasicornis	Oryctes	Dynastinae	Scarabaeidae	Scarabaeoidea	Neoptera	N/A
1st codon position	+	2280	27.7	18.5	34.7	19.1	62.4	37.6	46.8	0.113	0.018	Oryctes nasicornis	Oryctes	Dynastinae	Scarabaeidae	Scarabaeoidea	Neoptera	N/A
1st codon position	-	1431	40.7	8.9	28.4	21.9	69.1	30.8	62.6	-0.178	0.421	Oryctes nasicornis	Oryctes	Dynastinae	Scarabaeidae	Scarabaeoidea	Neoptera	N/A
2nd codon position	+	2280	44.3	22.1	20.8	12.8	65.1	34.9	57.1	-0.36	-0.269	Oryctes nasicornis	Oryctes	Dynastinae	Scarabaeidae	Scarabaeoidea	Neoptera	N/A
2nd codon position	-	1431	49.5	14.5	20.1	15.9	69.6	30.4	65.4	-0.422	0.048	Oryctes nasicornis	Oryctes	Dynastinae	Scarabaeidae	Scarabaeoidea	Neoptera	N/A
3rd codon position	+	2280	31.9	20	43.9	4.3	75.8	24.3	36.2	0.158	-0.649	Oryctes nasicornis	Oryctes	Dynastinae	Scarabaeidae	Scarabaeoidea	Neoptera	N/A
3rd codon position	-	1431	54.6	3.4	23.8	18.2	78.4	21.6	72.8	-0.393	0.688	Oryctes nasicornis	Oryctes	Dynastinae	Scarabaeidae	Scarabaeoidea	Neoptera	N/A
atp6	+	672	35.7	21.3	32.7	10.3	68.4	31.6	46	-0.043	-0.349	Oryctes nasicornis	Oryctes	Dynastinae	Scarabaeidae	Scarabaeoidea	Neoptera	N/A
atp8	+	156	36.5	19.2	38.5	5.8	75	25	42.3	0.026	-0.538	Oryctes nasicornis	Oryctes	Dynastinae	Scarabaeidae	Scarabaeoidea	Neoptera	N/A
cox1	+	1531	33.2	20.8	30.8	15.2	64	36	48.4	-0.039	-0.158	Oryctes nasicornis	Oryctes	Dynastinae	Scarabaeidae	Scarabaeoidea	Neoptera	N/A
cox2	+	688	32.4	21.1	33.3	13.2	65.7	34.3	45.6	0.013	-0.229	Oryctes nasicornis	Oryctes	Dynastinae	Scarabaeidae	Scarabaeoidea	Neoptera	N/A
cox3	+	787	34.1	19.2	32.4	14.4	66.5	33.6	48.5	-0.025	-0.144	Oryctes nasicornis	Oryctes	Dynastinae	Scarabaeidae	Scarabaeoidea	Neoptera	N/A
cyt b	+	1143	34.8	20.5	33	11.7	67.8	32.2	46.5	-0.027	-0.272	Oryctes nasicornis	Oryctes	Dynastinae	Scarabaeidae	Scarabaeoidea	Neoptera	N/A
nad1	-	951	48.5	8.7	23	19.8	71.5	28.5	68.3	-0.356	0.387	Oryctes nasicornis	Oryctes	Dynastinae	Scarabaeidae	Scarabaeoidea	Neoptera	N/A
nad2	+	1008	36.2	18.7	34.9	10.2	71.1	28.9	46.4	-0.018	-0.292	Oryctes nasicornis	Oryctes	Dynastinae	Scarabaeidae	Scarabaeoidea	Neoptera	N/A
nad3	+	354	35.6	22	31.9	10.5	67.5	32.5	46.1	-0.054	-0.357	Oryctes nasicornis	Oryctes	Dynastinae	Scarabaeidae	Scarabaeoidea	Neoptera	N/A
nad4	-	1338	48.6	8.7	24	18.8	72.6	27.5	67.4	-0.339	0.368	Oryctes nasicornis	Oryctes	Dynastinae	Scarabaeidae	Scarabaeoidea	Neoptera	N/A
nad4L	-	291	50.2	8.2	25.8	15.8	76	24	66	-0.321	0.314	Oryctes nasicornis	Oryctes	Dynastinae	Scarabaeidae	Scarabaeoidea	Neoptera	N/A
nad5	-	1714	47.6	9.3	24.5	18.5	72.1	27.8	66.1	-0.32	0.329	Oryctes nasicornis	Oryctes	Dynastinae	Scarabaeidae	Scarabaeoidea	Neoptera	N/A
nad6	+	504	36.5	18.7	37.7	7.1	74.2	25.8	43.6	0.016	-0.446	Oryctes nasicornis	Oryctes	Dynastinae	Scarabaeidae	Scarabaeoidea	Neoptera	N/A
rrnL	-	1280	42	7.9	31.9	18.2	73.9	26.1	60.2	-0.137	0.395	Oryctes nasicornis	Oryctes	Dynastinae	Scarabaeidae	Scarabaeoidea	Neoptera	N/A
rrnS	-	784	39.7	9.3	32	19	71.7	28.3	58.7	-0.107	0.342	Oryctes nasicornis	Oryctes	Dynastinae	Scarabaeidae	Scarabaeoidea	Neoptera	N/A
Full genome	+	18567	36.9	15.1	39.4	8.6	76.3	23.7	45.5	0.032	-0.275	Xylotrupes beckeri intermedius	Xylotrupes	Dynastinae	Scarabaeidae	Scarabaeoidea	Neoptera	N/A
PCGs	+	6837	39.4	15.8	33.6	11.1	73	26.9	50.5	-0.079	-0.175	Xylotrupes beckeri intermedius	Xylotrupes	Dynastinae	Scarabaeidae	Scarabaeoidea	Neoptera	N/A
PCGs	-	4287	47	8.2	30.3	14.4	77.3	22.6	61.4	-0.217	0.274	Xylotrupes beckeri intermedius	Xylotrupes	Dynastinae	Scarabaeidae	Scarabaeoidea	Neoptera	N/A
tRNAs	+	857	36.6	11.2	41.1	11.1	77.7	22.3	47.7	0.057	-0.005	Xylotrupes beckeri intermedius	Xylotrupes	Dynastinae	Scarabaeidae	Scarabaeoidea	Neoptera	N/A
tRNAs	-	590	39.2	8.3	37.6	14.9	76.8	23.2	54.1	-0.02	0.285	Xylotrupes beckeri intermedius	Xylotrupes	Dynastinae	Scarabaeidae	Scarabaeoidea	Neoptera	N/A
rRNAs	-	2065	40.7	6.9	36.8	15.6	77.5	22.5	56.3	-0.051	0.388	Xylotrupes beckeri intermedius	Xylotrupes	Dynastinae	Scarabaeidae	Scarabaeoidea	Neoptera	N/A
1st codon position	+	2279	30.8	15	36.6	17.6	67.4	32.6	48.4	0.087	0.081	Xylotrupes beckeri intermedius	Xylotrupes	Dynastinae	Scarabaeidae	Scarabaeoidea	Neoptera	N/A
1st codon position	-	1429	42.7	7.4	30.9	19	73.6	26.4	61.7	-0.161	0.439	Xylotrupes beckeri intermedius	Xylotrupes	Dynastinae	Scarabaeidae	Scarabaeoidea	Neoptera	N/A
2nd codon position	+	2279	45.4	20.9	20.9	12.9	66.3	33.8	58.3	-0.37	-0.238	Xylotrupes beckeri intermedius	Xylotrupes	Dynastinae	Scarabaeidae	Scarabaeoidea	Neoptera	N/A
2nd codon position	-	1429	49.8	14.3	20.8	15.1	70.6	29.4	64.9	-0.411	0.026	Xylotrupes beckeri intermedius	Xylotrupes	Dynastinae	Scarabaeidae	Scarabaeoidea	Neoptera	N/A
3rd codon position	+	2279	42	11.7	43.4	2.9	85.4	14.6	44.9	0.016	-0.602	Xylotrupes beckeri intermedius	Xylotrupes	Dynastinae	Scarabaeidae	Scarabaeoidea	Neoptera	N/A
3rd codon position	-	1429	48.6	2.9	39.2	9.2	87.8	12.1	57.8	-0.108	0.514	Xylotrupes beckeri intermedius	Xylotrupes	Dynastinae	Scarabaeidae	Scarabaeoidea	Neoptera	N/A
atp6	+	672	40.6	16.2	32.6	10.6	73.2	26.8	51.2	-0.11	-0.211	Xylotrupes beckeri intermedius	Xylotrupes	Dynastinae	Scarabaeidae	Scarabaeoidea	Neoptera	N/A
atp8	+	156	37.8	12.8	42.3	7.1	80.1	19.9	44.9	0.056	-0.29	Xylotrupes beckeri intermedius	Xylotrupes	Dynastinae	Scarabaeidae	Scarabaeoidea	Neoptera	N/A
cox1	+	1531	38.9	16.1	29.7	15.3	68.6	31.4	54.2	-0.134	-0.027	Xylotrupes beckeri intermedius	Xylotrupes	Dynastinae	Scarabaeidae	Scarabaeoidea	Neoptera	N/A
cox2	+	688	37.1	16.9	34.3	11.8	71.4	28.7	48.9	-0.039	-0.178	Xylotrupes beckeri intermedius	Xylotrupes	Dynastinae	Scarabaeidae	Scarabaeoidea	Neoptera	N/A
cox3	+	787	38.2	17.2	31.1	13.5	69.3	30.7	51.7	-0.103	-0.12	Xylotrupes beckeri intermedius	Xylotrupes	Dynastinae	Scarabaeidae	Scarabaeoidea	Neoptera	N/A
cyt b	+	1143	38.1	17.9	32.9	11.1	71	29	49.2	-0.073	-0.235	Xylotrupes beckeri intermedius	Xylotrupes	Dynastinae	Scarabaeidae	Scarabaeoidea	Neoptera	N/A
nad1	-	945	47	7.8	28.5	16.7	75.5	24.5	63.7	-0.245	0.362	Xylotrupes beckeri intermedius	Xylotrupes	Dynastinae	Scarabaeidae	Scarabaeoidea	Neoptera	N/A
nad2	+	1008	41.6	12.8	38.9	6.6	80.5	19.4	48.2	-0.033	-0.316	Xylotrupes beckeri intermedius	Xylotrupes	Dynastinae	Scarabaeidae	Scarabaeoidea	Neoptera	N/A
nad3	+	354	43.8	13.6	33.6	9	77.4	22.6	52.8	-0.131	-0.2	Xylotrupes beckeri intermedius	Xylotrupes	Dynastinae	Scarabaeidae	Scarabaeoidea	Neoptera	N/A
nad4	-	1338	47.7	8.1	30.3	13.8	78	21.9	61.5	-0.222	0.256	Xylotrupes beckeri intermedius	Xylotrupes	Dynastinae	Scarabaeidae	Scarabaeoidea	Neoptera	N/A
nad4L	-	291	50.2	5.2	30.6	14.1	80.8	19.3	64.3	-0.243	0.464	Xylotrupes beckeri intermedius	Xylotrupes	Dynastinae	Scarabaeidae	Scarabaeoidea	Neoptera	N/A
nad5	-	1714	46	9	31.2	13.8	77.2	22.8	59.8	-0.193	0.207	Xylotrupes beckeri intermedius	Xylotrupes	Dynastinae	Scarabaeidae	Scarabaeoidea	Neoptera	N/A
nad6	+	501	40.7	14.8	38.3	6.2	79	21	46.9	-0.03	-0.41	Xylotrupes beckeri intermedius	Xylotrupes	Dynastinae	Scarabaeidae	Scarabaeoidea	Neoptera	N/A
rrnL	-	1281	41.5	6.3	37.5	14.7	79	21	56.2	-0.049	0.398	Xylotrupes beckeri intermedius	Xylotrupes	Dynastinae	Scarabaeidae	Scarabaeoidea	Neoptera	N/A
rrnS	-	784	39.5	7.8	35.6	17.1	75.1	24.9	56.6	-0.053	0.374	Xylotrupes beckeri intermedius	Xylotrupes	Dynastinae	Scarabaeidae	Scarabaeoidea	Neoptera	N/A
Full genome	+	18434	36.8	15.2	39.5	8.6	76.3	23.8	45.4	0.035	-0.277	Xylotrupes gideon beckeri	Xylotrupes	Dynastinae	Scarabaeidae	Scarabaeoidea	Neoptera	N/A
PCGs	+	6837	39.5	15.6	33.8	11.1	73.3	26.7	50.6	-0.077	-0.171	Xylotrupes gideon beckeri	Xylotrupes	Dynastinae	Scarabaeidae	Scarabaeoidea	Neoptera	N/A
PCGs	-	4287	47.2	8.3	30.1	14.5	77.3	22.8	61.7	-0.221	0.272	Xylotrupes gideon beckeri	Xylotrupes	Dynastinae	Scarabaeidae	Scarabaeoidea	Neoptera	N/A
tRNAs	+	858	36.7	11.2	40.8	11.3	77.5	22.5	48	0.053	0.005	Xylotrupes gideon beckeri	Xylotrupes	Dynastinae	Scarabaeidae	Scarabaeoidea	Neoptera	N/A
tRNAs	-	590	39	8.3	38.1	14.6	77.1	22.9	53.6	-0.011	0.274	Xylotrupes gideon beckeri	Xylotrupes	Dynastinae	Scarabaeidae	Scarabaeoidea	Neoptera	N/A
rRNAs	-	2066	40.7	6.9	37.1	15.4	77.8	22.3	56.1	-0.046	0.383	Xylotrupes gideon beckeri	Xylotrupes	Dynastinae	Scarabaeidae	Scarabaeoidea	Neoptera	N/A
1st codon position	+	2279	30.8	15	36.4	17.7	67.2	32.7	48.5	0.082	0.083	Xylotrupes gideon beckeri	Xylotrupes	Dynastinae	Scarabaeidae	Scarabaeoidea	Neoptera	N/A
1st codon position	-	1429	42.3	7.9	30.7	19.1	73	27	61.4	-0.16	0.415	Xylotrupes gideon beckeri	Xylotrupes	Dynastinae	Scarabaeidae	Scarabaeoidea	Neoptera	N/A
2nd codon position	+	2279	45.3	20.9	20.9	12.9	66.2	33.8	58.2	-0.369	-0.238	Xylotrupes gideon beckeri	Xylotrupes	Dynastinae	Scarabaeidae	Scarabaeoidea	Neoptera	N/A
2nd codon position	-	1429	49.7	14.3	20.9	15.1	70.6	29.4	64.8	-0.409	0.026	Xylotrupes gideon beckeri	Xylotrupes	Dynastinae	Scarabaeidae	Scarabaeoidea	Neoptera	N/A
3rd codon position	+	2279	42.3	11	44.2	2.6	86.5	13.6	44.9	0.022	-0.618	Xylotrupes gideon beckeri	Xylotrupes	Dynastinae	Scarabaeidae	Scarabaeoidea	Neoptera	N/A
3rd codon position	-	1429	49.5	2.6	38.8	9.2	88.3	11.8	58.7	-0.121	0.56	Xylotrupes gideon beckeri	Xylotrupes	Dynastinae	Scarabaeidae	Scarabaeoidea	Neoptera	N/A
atp6	+	672	40.2	16.5	33.5	9.8	73.7	26.3	50	-0.091	-0.254	Xylotrupes gideon beckeri	Xylotrupes	Dynastinae	Scarabaeidae	Scarabaeoidea	Neoptera	N/A
atp8	+	156	39.1	12.2	41.7	7.1	80.8	19.3	46.2	0.032	-0.267	Xylotrupes gideon beckeri	Xylotrupes	Dynastinae	Scarabaeidae	Scarabaeoidea	Neoptera	N/A
cox1	+	1531	38.8	16.1	30	15.1	68.8	31.2	53.9	-0.127	-0.031	Xylotrupes gideon beckeri	Xylotrupes	Dynastinae	Scarabaeidae	Scarabaeoidea	Neoptera	N/A
cox2	+	688	37.6	16.6	34.3	11.5	71.9	28.1	49.1	-0.046	-0.181	Xylotrupes gideon beckeri	Xylotrupes	Dynastinae	Scarabaeidae	Scarabaeoidea	Neoptera	N/A
cox3	+	787	38.9	16.4	30.9	13.9	69.8	30.3	52.8	-0.115	-0.084	Xylotrupes gideon beckeri	Xylotrupes	Dynastinae	Scarabaeidae	Scarabaeoidea	Neoptera	N/A
cyt b	+	1143	38.1	17.6	33.2	11.2	71.3	28.8	49.3	-0.069	-0.222	Xylotrupes gideon beckeri	Xylotrupes	Dynastinae	Scarabaeidae	Scarabaeoidea	Neoptera	N/A
nad1	-	945	47.4	7.7	28	16.8	75.4	24.5	64.2	-0.257	0.371	Xylotrupes gideon beckeri	Xylotrupes	Dynastinae	Scarabaeidae	Scarabaeoidea	Neoptera	N/A
nad2	+	1008	41.1	12.9	39.5	6.4	80.6	19.3	47.5	-0.02	-0.333	Xylotrupes gideon beckeri	Xylotrupes	Dynastinae	Scarabaeidae	Scarabaeoidea	Neoptera	N/A
nad3	+	354	44.4	12.4	33.6	9.3	78	21.7	53.7	-0.138	-0.143	Xylotrupes gideon beckeri	Xylotrupes	Dynastinae	Scarabaeidae	Scarabaeoidea	Neoptera	N/A
nad4	-	1338	47.8	8.3	30.1	13.8	77.9	22.1	61.6	-0.227	0.247	Xylotrupes gideon beckeri	Xylotrupes	Dynastinae	Scarabaeidae	Scarabaeoidea	Neoptera	N/A
nad4L	-	291	49.8	5.5	29.6	15.1	79.4	20.6	64.9	-0.255	0.467	Xylotrupes gideon beckeri	Xylotrupes	Dynastinae	Scarabaeidae	Scarabaeoidea	Neoptera	N/A
nad5	-	1714	46.1	9	31.3	13.6	77.4	22.6	59.7	-0.192	0.201	Xylotrupes gideon beckeri	Xylotrupes	Dynastinae	Scarabaeidae	Scarabaeoidea	Neoptera	N/A
nad6	+	501	41.1	14.8	37.3	6.8	78.4	21.6	47.9	-0.048	-0.37	Xylotrupes gideon beckeri	Xylotrupes	Dynastinae	Scarabaeidae	Scarabaeoidea	Neoptera	N/A
rrnL	-	1281	41.5	6.2	37.9	14.4	79.4	20.6	55.9	-0.044	0.394	Xylotrupes gideon beckeri	Xylotrupes	Dynastinae	Scarabaeidae	Scarabaeoidea	Neoptera	N/A
rrnS	-	785	39.4	7.9	35.7	17.1	75.1	25	56.5	-0.049	0.367	Xylotrupes gideon beckeri	Xylotrupes	Dynastinae	Scarabaeidae	Scarabaeoidea	Neoptera	N/A
Full genome	+	18660	37.3	14.6	39.8	8.2	77.1	22.8	45.5	0.032	-0.277	Xylotrupes gideon siamensis	Xylotrupes	Dynastinae	Scarabaeidae	Scarabaeoidea	Neoptera	N/A
PCGs	+	6837	40	15.4	33.8	10.8	73.8	26.2	50.8	-0.084	-0.175	Xylotrupes gideon siamensis	Xylotrupes	Dynastinae	Scarabaeidae	Scarabaeoidea	Neoptera	N/A
PCGs	-	4287	47.7	7.9	30.6	13.9	78.3	21.8	61.6	-0.218	0.275	Xylotrupes gideon siamensis	Xylotrupes	Dynastinae	Scarabaeidae	Scarabaeoidea	Neoptera	N/A
tRNAs	+	984	36.7	11.6	40.8	10.9	77.5	22.5	47.6	0.052	-0.032	Xylotrupes gideon siamensis	Xylotrupes	Dynastinae	Scarabaeidae	Scarabaeoidea	Neoptera	N/A
tRNAs	-	461	39.7	7.4	38.2	14.8	77.9	22.2	54.5	-0.019	0.333	Xylotrupes gideon siamensis	Xylotrupes	Dynastinae	Scarabaeidae	Scarabaeoidea	Neoptera	N/A
rRNAs	-	2065	40.6	6.7	37.4	15.3	78	22	55.9	-0.041	0.389	Xylotrupes gideon siamensis	Xylotrupes	Dynastinae	Scarabaeidae	Scarabaeoidea	Neoptera	N/A
1st codon position	+	2279	30.5	15.3	36.4	17.8	66.9	33.1	48.3	0.088	0.076	Xylotrupes gideon siamensis	Xylotrupes	Dynastinae	Scarabaeidae	Scarabaeoidea	Neoptera	N/A
1st codon position	-	1429	42.8	7.6	30.6	19	73.4	26.6	61.8	-0.167	0.432	Xylotrupes gideon siamensis	Xylotrupes	Dynastinae	Scarabaeidae	Scarabaeoidea	Neoptera	N/A
2nd codon position	+	2279	45.2	21.1	20.8	12.9	66	34	58.1	-0.368	-0.244	Xylotrupes gideon siamensis	Xylotrupes	Dynastinae	Scarabaeidae	Scarabaeoidea	Neoptera	N/A
2nd codon position	-	1429	49.8	14.3	20.6	15.3	70.4	29.6	65.1	-0.414	0.035	Xylotrupes gideon siamensis	Xylotrupes	Dynastinae	Scarabaeidae	Scarabaeoidea	Neoptera	N/A
3rd codon position	+	2279	44.3	9.7	44.2	1.8	88.5	11.5	46.1	-0.001	-0.693	Xylotrupes gideon siamensis	Xylotrupes	Dynastinae	Scarabaeidae	Scarabaeoidea	Neoptera	N/A
3rd codon position	-	1429	50.4	1.8	40.5	7.3	90.9	9.1	57.7	-0.109	0.6	Xylotrupes gideon siamensis	Xylotrupes	Dynastinae	Scarabaeidae	Scarabaeoidea	Neoptera	N/A
atp6	+	672	40.2	16.4	33.3	10	73.5	26.4	50.2	-0.093	-0.243	Xylotrupes gideon siamensis	Xylotrupes	Dynastinae	Scarabaeidae	Scarabaeoidea	Neoptera	N/A
atp8	+	156	37.8	12.8	44.2	5.1	82	17.9	42.9	0.078	-0.429	Xylotrupes gideon siamensis	Xylotrupes	Dynastinae	Scarabaeidae	Scarabaeoidea	Neoptera	N/A
cox1	+	1531	39.4	15.5	30.6	14.6	70	30.1	54	-0.126	-0.03	Xylotrupes gideon siamensis	Xylotrupes	Dynastinae	Scarabaeidae	Scarabaeoidea	Neoptera	N/A
cox2	+	688	38.1	15.8	34.3	11.8	72.4	27.6	49.9	-0.052	-0.147	Xylotrupes gideon siamensis	Xylotrupes	Dynastinae	Scarabaeidae	Scarabaeoidea	Neoptera	N/A
cox3	+	787	39	16.6	30.6	13.7	69.6	30.3	52.7	-0.12	-0.096	Xylotrupes gideon siamensis	Xylotrupes	Dynastinae	Scarabaeidae	Scarabaeoidea	Neoptera	N/A
cyt b	+	1143	39.5	17	33.2	10.2	72.7	27.2	49.7	-0.087	-0.248	Xylotrupes gideon siamensis	Xylotrupes	Dynastinae	Scarabaeidae	Scarabaeoidea	Neoptera	N/A
nad1	-	945	47.7	7.5	28.7	16.1	76.4	23.6	63.8	-0.249	0.363	Xylotrupes gideon siamensis	Xylotrupes	Dynastinae	Scarabaeidae	Scarabaeoidea	Neoptera	N/A
nad2	+	1008	41.3	13.3	38.7	6.7	80	20	48	-0.032	-0.327	Xylotrupes gideon siamensis	Xylotrupes	Dynastinae	Scarabaeidae	Scarabaeoidea	Neoptera	N/A
nad3	+	354	44.4	13.3	32.8	9.6	77.2	22.9	54	-0.15	-0.16	Xylotrupes gideon siamensis	Xylotrupes	Dynastinae	Scarabaeidae	Scarabaeoidea	Neoptera	N/A
nad4	-	1338	48.5	8.1	30.5	12.9	79	21	61.4	-0.228	0.231	Xylotrupes gideon siamensis	Xylotrupes	Dynastinae	Scarabaeidae	Scarabaeoidea	Neoptera	N/A
nad4L	-	291	50.5	4.8	31.6	13.1	82.1	17.9	63.6	-0.23	0.462	Xylotrupes gideon siamensis	Xylotrupes	Dynastinae	Scarabaeidae	Scarabaeoidea	Neoptera	N/A
nad5	-	1714	46.5	8.5	31.5	13.5	78	22	60	-0.192	0.231	Xylotrupes gideon siamensis	Xylotrupes	Dynastinae	Scarabaeidae	Scarabaeoidea	Neoptera	N/A
nad6	+	501	42.1	13.8	37.5	6.4	79.6	20.2	48.5	-0.058	-0.366	Xylotrupes gideon siamensis	Xylotrupes	Dynastinae	Scarabaeidae	Scarabaeoidea	Neoptera	N/A
rrnL	-	1281	41.5	6.1	38.1	14.4	79.6	20.5	55.9	-0.042	0.405	Xylotrupes gideon siamensis	Xylotrupes	Dynastinae	Scarabaeidae	Scarabaeoidea	Neoptera	N/A
rrnS	-	784	39.2	7.8	36.2	16.8	75.4	24.6	56	-0.039	0.368	Xylotrupes gideon siamensis	Xylotrupes	Dynastinae	Scarabaeidae	Scarabaeoidea	Neoptera	N/A
Full genome	+	19687	36.7	15.6	39.4	8.2	76.1	23.8	44.9	0.035	-0.312	Xylotrupes gideon sumatrensis	Xylotrupes	Dynastinae	Scarabaeidae	Scarabaeoidea	Neoptera	N/A
PCGs	+	6837	39.5	15.7	33.8	11.1	73.3	26.8	50.6	-0.077	-0.172	Xylotrupes gideon sumatrensis	Xylotrupes	Dynastinae	Scarabaeidae	Scarabaeoidea	Neoptera	N/A
PCGs	-	4287	47.2	8.3	30.1	14.4	77.3	22.7	61.6	-0.221	0.271	Xylotrupes gideon sumatrensis	Xylotrupes	Dynastinae	Scarabaeidae	Scarabaeoidea	Neoptera	N/A
tRNAs	+	987	36.9	11.4	40.6	11	77.5	22.4	47.9	0.048	-0.018	Xylotrupes gideon sumatrensis	Xylotrupes	Dynastinae	Scarabaeidae	Scarabaeoidea	Neoptera	N/A
tRNAs	-	461	39.5	7.4	38.2	15	77.7	22.4	54.5	-0.017	0.34	Xylotrupes gideon sumatrensis	Xylotrupes	Dynastinae	Scarabaeidae	Scarabaeoidea	Neoptera	N/A
rRNAs	-	2064	40.6	6.9	37.1	15.4	77.7	22.3	56	-0.045	0.383	Xylotrupes gideon sumatrensis	Xylotrupes	Dynastinae	Scarabaeidae	Scarabaeoidea	Neoptera	N/A
1st codon position	+	2279	30.8	15	36.3	17.8	67.1	32.8	48.6	0.082	0.086	Xylotrupes gideon sumatrensis	Xylotrupes	Dynastinae	Scarabaeidae	Scarabaeoidea	Neoptera	N/A
1st codon position	-	1429	42.3	7.9	30.7	19.1	73	27	61.4	-0.16	0.415	Xylotrupes gideon sumatrensis	Xylotrupes	Dynastinae	Scarabaeidae	Scarabaeoidea	Neoptera	N/A
2nd codon position	+	2279	45.3	20.9	20.9	12.9	66.2	33.8	58.2	-0.369	-0.239	Xylotrupes gideon sumatrensis	Xylotrupes	Dynastinae	Scarabaeidae	Scarabaeoidea	Neoptera	N/A
2nd codon position	-	1429	49.7	14.3	20.9	15.1	70.6	29.4	64.8	-0.409	0.026	Xylotrupes gideon sumatrensis	Xylotrupes	Dynastinae	Scarabaeidae	Scarabaeoidea	Neoptera	N/A
3rd codon position	+	2279	42.2	11.1	44.2	2.5	86.4	13.6	44.7	0.023	-0.631	Xylotrupes gideon sumatrensis	Xylotrupes	Dynastinae	Scarabaeidae	Scarabaeoidea	Neoptera	N/A
3rd codon position	-	1429	49.5	2.6	38.8	9.1	88.3	11.7	58.6	-0.12	0.557	Xylotrupes gideon sumatrensis	Xylotrupes	Dynastinae	Scarabaeidae	Scarabaeoidea	Neoptera	N/A
atp6	+	672	39.9	16.8	33.6	9.7	73.5	26.5	49.6	-0.085	-0.27	Xylotrupes gideon sumatrensis	Xylotrupes	Dynastinae	Scarabaeidae	Scarabaeoidea	Neoptera	N/A
atp8	+	156	39.1	12.2	41.7	7.1	80.8	19.3	46.2	0.032	-0.267	Xylotrupes gideon sumatrensis	Xylotrupes	Dynastinae	Scarabaeidae	Scarabaeoidea	Neoptera	N/A
cox1	+	1531	38.9	16	30	15.1	68.9	31.1	54	-0.128	-0.029	Xylotrupes gideon sumatrensis	Xylotrupes	Dynastinae	Scarabaeidae	Scarabaeoidea	Neoptera	N/A
cox2	+	688	37.5	16.7	34	11.8	71.5	28.5	49.3	-0.049	-0.173	Xylotrupes gideon sumatrensis	Xylotrupes	Dynastinae	Scarabaeidae	Scarabaeoidea	Neoptera	N/A
cox3	+	787	38.9	16.4	30.9	13.9	69.8	30.3	52.8	-0.115	-0.084	Xylotrupes gideon sumatrensis	Xylotrupes	Dynastinae	Scarabaeidae	Scarabaeoidea	Neoptera	N/A
cyt b	+	1143	38.1	17.5	33.2	11.1	71.3	28.6	49.2	-0.069	-0.223	Xylotrupes gideon sumatrensis	Xylotrupes	Dynastinae	Scarabaeidae	Scarabaeoidea	Neoptera	N/A
nad1	-	945	47.4	7.7	28.1	16.7	75.5	24.4	64.1	-0.255	0.368	Xylotrupes gideon sumatrensis	Xylotrupes	Dynastinae	Scarabaeidae	Scarabaeoidea	Neoptera	N/A
nad2	+	1008	41	13.1	39.4	6.5	80.4	19.6	47.5	-0.02	-0.333	Xylotrupes gideon sumatrensis	Xylotrupes	Dynastinae	Scarabaeidae	Scarabaeoidea	Neoptera	N/A
nad3	+	354	44.4	12.7	33.6	9.3	78	22	53.7	-0.138	-0.154	Xylotrupes gideon sumatrensis	Xylotrupes	Dynastinae	Scarabaeidae	Scarabaeoidea	Neoptera	N/A
nad4	-	1338	47.9	8.2	30.1	13.8	78	22	61.7	-0.228	0.252	Xylotrupes gideon sumatrensis	Xylotrupes	Dynastinae	Scarabaeidae	Scarabaeoidea	Neoptera	N/A
nad4L	-	291	49.5	5.8	29.6	15.1	79.1	20.9	64.6	-0.252	0.443	Xylotrupes gideon sumatrensis	Xylotrupes	Dynastinae	Scarabaeidae	Scarabaeoidea	Neoptera	N/A
nad5	-	1714	46.1	9	31.3	13.6	77.4	22.6	59.7	-0.192	0.201	Xylotrupes gideon sumatrensis	Xylotrupes	Dynastinae	Scarabaeidae	Scarabaeoidea	Neoptera	N/A
nad6	+	501	41.3	14.6	37.5	6.6	78.8	21.2	47.9	-0.048	-0.377	Xylotrupes gideon sumatrensis	Xylotrupes	Dynastinae	Scarabaeidae	Scarabaeoidea	Neoptera	N/A
rrnL	-	1281	41.5	6.2	37.9	14.4	79.4	20.6	55.9	-0.044	0.394	Xylotrupes gideon sumatrensis	Xylotrupes	Dynastinae	Scarabaeidae	Scarabaeoidea	Neoptera	N/A
rrnS	-	783	39.2	7.9	35.8	17.1	75	25	56.3	-0.046	0.367	Xylotrupes gideon sumatrensis	Xylotrupes	Dynastinae	Scarabaeidae	Scarabaeoidea	Neoptera	N/A
