# Supplementary material for: The Mitochondrial Genomes of 18 New Pleurosticti (Coleoptera: Scarabaeidae) Exhibit a Novel trnQ-NCR-trnI-trnM Gene Rearrangement and Clarify Phylogenetic Relationships of Subfamilies within Scarabaeidae
Source: Insects. 2021 Nov 14;12(11):1025. doi: 10.3390/insects12111025 (PMC8622766; doi:10.3390/insects12111025)
Supplement: Supplementary file 1 [file insects-12-01025-s001.zip › Table S5.xls]

## Sheet: geom_line
DYNASTINAE SPECIES
Chalcosoma caucasus caucasus			71 bp	TTCAATTTTTACTATTTTATCATAAAAATAATTGAAATTATTTATGCAATATTAATCAATTATAAAATTTT
Dynastes hercules hercules			69 bp	TCACTATCCCCTCCCCTCAACCACATATAGTTTATGCAACCTCCCTTCTTATACAAATAAT
Megasoma elephas elephas			412 bp	TACACAAAAATGCAATTTCGTGAAAATGGGTTAGCACAAATTCCCAAAGGAGCAACCGACCATGCACAAAAAAAAACTTTTTCAAAATTTTGGAACACTCACCAGTTTTTTTCAAAAATAAGCCACTTCACCCCACCACCGACTCTCCTGCTTAACCTTTACCTTAAAACCTCCATGCAAGCCAAGATATCAATCAGCAATAAACCTAAAAGAAATTTTAACAAATTTTAGTATTAAATAAATAAGTAAATATTAATTAAATTTTCCTATTTAATTCTTTTTTACCAGAACAAAATCCTCCCTCCCTGTAAATTTAAAAATCTATTCTAATTAAACTTTCAATCATAAAGCAAGAATTAATTCTATCAGCTCTTAATCATAAAAGTTTATGTTTCTTTA…
Megasoma mars			412 bp	TACACAAAAATGCAATTTCGTGAAAATGGGTTAGCACAAATTCCCAAAGGAGCAACCGACCATGCACAAAAAAAAACTTTTTCAAAATTTTGGAACACTCACCAGTTTTTTTCAAAAATAAGCCACTTCACCCCACCACCGACTCTCCTGCTTAACCTTTACCTTAAAACCTCCATGCAAGCCAAGATATCAATCAGCAATAAACCTAAAAGAAATTTTAACAAATTTTAGTATTAAATAAATAAGTAAATATTAATTAAATTTTCCTATTTAATTCTTTTTTACCAGAACAAAATCCTCCCTCCCTGTAAATTTAAAAATCTATTCTAATTAAACTTTCAATCATAAAGCAAGAATTAATTCTATCAGCTCTTAATCATAAAAGTTTATGTTTCTTTA…
Oryctes nasicornis			56 bp	CATATATGATACTTATTAAAACTAATTTATGCAAAATAACTTTTTTATAAATCCTA
Xylotrupes beckeri intermedius			63 bp	CCCCTTATTTTATAAAATTTTTACCTAAATAATTTATGTCACTTAATACTTAGATAAAATTTA
Xylotrupes gideon beckeri			63 bp	CTCCTTATTTTATATAATTTTTACCTAAATAATTTATGTCACTATATACTTAGATAAAATTTA
Xylotrupes gideon siamensis			63 bp	ACCCTTATTTTATATAATTTCAACCTAAATAATTTATGTCACCCCATACTTATATAAAATTTA
Xylotrupes gideon sumatrensis			63 bp	CTCCTTATTTTATATAATTTTTACCTAAATAATTTATGTCGCTATATACTTAGATAAAATTTA
Table S5: NCR1 and NCR2 sequences in Dynastinae species. NCR= Non coding Region
