# Supplementary material for: The Mitochondrial Genomes of 18 New Pleurosticti (Coleoptera: Scarabaeidae) Exhibit a Novel trnQ-NCR-trnI-trnM Gene Rearrangement and Clarify Phylogenetic Relationships of Subfamilies within Scarabaeidae
Source: Insects. 2021 Nov 14;12(11):1025. doi: 10.3390/insects12111025 (PMC8622766; doi:10.3390/insects12111025)
Supplement: Supplementary file 1 [file insects-12-01025-s001.zip › Table S6.xls]

## Sheet: Nucleotide Composition
Domain: Data
CETONIINAE SPECIES	T(U)	C	A	G	Total	A+T%	G+C%
Cyprolais quadrimaculata	40.5113	12.7827	40.5605	6.14553	2034	81.0718	18.9282
Dicronorhina derbyana	39.0144	12.731	42.8131	5.44148	1948	81.8275	18.1725
Eudicella euthalia oweni	35.3672	14.688	45.3893	4.55549	3622	80.7565	19.2435
Eudicella smithi	38.9724	12.6515	43.238	5.13815	2063	82.2104	17.7896
Goliathus goliatus	39.4014	15.7804	40.4897	4.32847	4043	79.8912	20.1088
Jumnos ruckeri	33.1607	21.7274	37.0547	8.05717	4828	70.2154	29.7846
Mecynorhina polyphemus	42.9617	11.3176	41.7793	3.94144	1776	84.741	15.259
Mecynorhina torquata ugandensis	41.6009	13.5647	40.6546	4.17981	2536	82.2555	17.7445
Protaetia speciosa jousselini	37.7071	13.8622	42.8945	5.53618	2294	80.6016	19.3984
DYNASTINAE SPECIES
Chalcosoma caucasus caucasus	37.2182	15.7593	41.6631	5.35942	4702	78.8813	21.1187
Dynastes hercules hercules	32.6464	21.2954	33.4642	12.594	3057	66.1106	33.8894
Oryctes nasicornis	31.5242	20.7048	38.4493	9.32159	5675	69.9736	30.0264
Megasoma elephas elephas	34.6489	19.1526	38.4214	7.77713	1723	73.0702	26.9298
Megasoma mars	33.6629	20.2393	37.9813	8.11655	1922	71.6441	28.3559
Xylotrupes beckeri intermedius	39.9637	15.022	40.0155	4.9987	3861	79.9793	20.0207
Xylotrupes gideon beckeri	39.0139	15.9432	40.1661	4.87674	3732	79.1801	20.8199
Xylotrupes gideon siamensis	40	14.1593	41.1884	4.65234	3955	81.1884	18.8116
Xylotrupes gideon sumatrensis	38.1592	17.6258	39.8235	4.39142	4987	77.9828	22.0172
Table S6. Nucleotide composition and skewness of the A-T rich region of Cetoniinae and Dynastinae species

## Sheet: Info
Data Filename:	AT ori.meg
Data Title:	MEG
Nucleotide Frequencies
Sites Used:	All selected
All frequencies are given in percent.
