# Supplementary material for: The Mitochondrial Genomes of 18 New Pleurosticti (Coleoptera: Scarabaeidae) Exhibit a Novel trnQ-NCR-trnI-trnM Gene Rearrangement and Clarify Phylogenetic Relationships of Subfamilies within Scarabaeidae
Source: Insects. 2021 Nov 14;12(11):1025. doi: 10.3390/insects12111025 (PMC8622766; doi:10.3390/insects12111025)
Supplement: Supplementary file 1 [file insects-12-01025-s001.zip › Table S8.xls]

## Sheet: all_AA_count_stat
AA	Cyprolais quadrimaculata	Dicronorhina derbyana	Eudicella euthalia oweni	Eudicella smithi	Goliathus goliatus	Jumnos ruckeri	Mecynorhina polyphemus	Mecynorhina torquata ugandensis	Protaetia speciosa jousselini	Chalcosoma caucasus caucasus	Dynastes hercules hercules	Megasoma elephas elephas	Megasoma mars	Oryctes nasicornis	Xylotrupes beckeri intermedius	Xylotrupes gideon beckeri	Xylotrupes gideon siamensis	Xylotrupes gideon sumatrensis
Phe	328	324	331	332	332	332	330	332	323	341	345	346	346	343	345	342	344	342
Leu2	377	365	385	393	379	384	394	379	428	449	268	303	303	311	430	431	433	431
Leu1	192	197	182	175	193	184	175	193	149	111	291	247	247	221	118	125	122	125
Ile	379	400	371	367	402	388	391	402	388	389	342	375	375	345	394	387	390	387
Met	253	262	262	264	261	256	250	261	256	265	259	248	248	274	284	283	275	282
Val	199	186	205	202	170	181	180	170	181	177	210	208	208	222	172	174	174	176
Ser2	209	203	203	204	210	207	196	210	197	197	210	214	214	221	196	195	194	195
Pro	132	131	134	134	131	130	132	131	131	130	135	138	138	129	133	133	133	133
Thr	194	191	199	200	191	203	201	191	208	210	201	195	195	187	197	198	202	198
Ala	165	164	162	163	159	166	170	159	168	153	170	170	170	175	155	155	157	156
Tyr	183	188	182	181	184	184	190	184	190	195	177	173	173	195	199	199	195	199
His	74	72	73	73	70	71	74	70	71	77	80	76	76	81	74	75	78	75
Gln	63	67	63	63	62	66	62	62	66	63	65	64	64	61	66	66	66	66
Asn	176	181	177	175	183	178	182	183	181	183	165	168	168	173	185	185	184	185
Lys	101	98	103	104	101	94	102	101	96	100	101	100	100	98	99	99	97	99
Asp	69	73	67	68	69	66	70	69	68	65	69	66	66	71	64	65	65	65
Glu	73	75	74	74	75	77	74	75	76	76	78	80	80	75	77	76	76	76
Cys	45	44	44	45	47	45	45	47	43	43	48	46	46	43	40	40	41	40
Trp	95	95	95	95	94	95	95	94	93	92	92	94	94	91	92	92	92	92
Arg	57	55	56	56	55	56	55	55	55	58	55	56	56	57	56	56	57	56
Ser1	133	123	131	129	137	137	135	137	135	125	127	126	126	121	116	115	117	115
Gly	205	209	204	206	197	203	199	197	199	203	214	209	209	207	204	206	205	206
	3702	3703	3703	3703	3702	3703	3702	3702	3702	3702	3702	3702	3702	3701	3696	3697	3697	3699
Table S8. Total number of Codon, Codon frequency and Usage for each amino acid of mitochondrial genome of Cetoniinae and Dynastinae species.

## Sheet: Codon count
codon	Cyprolais quadrimaculata	Dicronorhina derbyana	Eudicella euthalia oweni	Eudicella smithi	Goliathus goliatus	Jumnos ruckeri	Mecynorhina polyphemus	Mecynorhina torquata ugandensis	Protaetia speciosa jousselini	Chalcosoma caucasus caucasus	Dynastes hercules hercules	Megasoma elephas elephas	Megasoma mars	Oryctes nasicornis	Xylotrupes beckeri intermedius	Xylotrupes gideon beckeri	Xylotrupes gideon siamensis	Xylotrupes gideon sumatrensis
UUU	269	247	271	264	277	277	285	277	262	284	238	267	267	240	300	302	303	300
UUC	59	77	60	68	55	55	45	55	61	57	107	79	79	103	45	40	41	42
UUA	334	305	337	354	340	321	363	340	386	424	188	211	211	230	391	392	416	393
UUG	43	60	48	39	39	63	31	39	42	25	80	92	92	81	39	39	17	38
CUU	85	89	84	82	113	78	99	113	62	52	99	100	100	85	60	61	64	61
CUC	18	20	14	17	16	17	14	16	14	7	36	27	27	24	6	7	7	7
CUA	82	84	80	74	60	76	59	60	69	49	121	107	107	102	48	56	48	56
CUG	7	4	4	2	4	13	3	4	4	3	35	13	13	10	4	1	3	1
AUU	310	327	307	303	349	318	342	349	317	340	239	273	273	250	338	334	346	334
AUC	69	73	64	64	53	70	49	53	71	49	103	102	102	95	56	53	44	53
AUA	223	223	235	235	237	214	220	237	230	238	197	189	189	201	255	254	253	252
AUG	30	39	27	29	24	42	30	24	26	27	62	59	59	73	29	29	22	30
GUU	100	88	116	110	83	83	85	83	85	74	87	95	95	119	76	72	81	73
GUC	18	5	8	8	13	17	15	13	15	5	36	17	17	19	7	6	5	7
GUA	72	88	72	77	63	67	74	63	74	88	62	79	79	70	81	81	80	81
GUG	9	5	9	7	11	14	6	11	7	10	25	17	17	14	8	15	8	15
UCU	86	85	96	98	93	80	108	93	99	91	73	75	75	83	98	99	105	99
UCC	25	30	15	13	19	30	19	19	14	21	43	28	28	22	20	19	12	19
UCA	89	82	91	89	90	72	65	90	83	84	86	102	102	102	75	76	76	76
UCG	9	6	1	4	8	25	4	8	1	1	8	9	9	14	3	1	1	1
CCU	66	66	78	81	79	71	70	79	64	62	60	61	61	50	67	77	73	76
CCC	18	18	19	17	10	23	21	10	16	16	29	20	20	19	15	8	11	9
CCA	39	37	28	30	41	32	38	41	47	47	36	53	53	50	46	44	44	45
CCG	9	10	9	6	1	4	3	1	4	5	10	4	4	10	5	4	5	3
ACU	78	72	77	84	97	77	96	97	78	100	59	70	70	72	83	85	95	84
ACC	27	26	26	22	19	34	21	19	15	23	50	32	32	31	20	17	13	18
ACA	84	92	92	92	71	84	80	71	112	84	84	88	88	77	93	95	93	94
ACG	5	1	4	2	4	8	4	4	3	3	8	5	5	7	1	1	1	2
GCU	70	82	77	76	89	80	98	89	101	83	58	61	61	73	93	88	88	89
GCC	29	24	23	24	21	37	18	21	11	12	51	43	43	28	14	17	16	17
GCA	56	56	59	63	45	46	49	45	51	55	53	60	60	68	45	47	51	47
GCG	10	2	3	0	4	3	5	4	5	3	8	6	6	6	3	3	2	3
UAU	141	154	142	143	151	131	149	151	147	167	123	128	128	154	160	167	162	168
UAC	42	34	40	38	33	53	41	33	43	28	54	45	45	41	39	32	33	31
CAU	52	52	58	58	53	54	55	53	59	65	43	53	53	51	61	64	66	65
CAC	22	20	15	15	17	17	19	17	12	12	37	23	23	30	13	11	12	10
CAA	48	54	53	52	53	48	53	53	60	58	37	47	47	51	60	59	60	59
CAG	15	13	10	11	9	18	9	9	6	5	28	17	17	10	6	7	6	7
AAU	133	144	138	136	143	132	148	143	137	163	98	105	105	129	150	148	160	149
AAC	43	37	39	39	40	46	34	40	44	20	67	63	63	44	35	37	24	36
AAA	70	74	77	75	87	76	83	87	65	83	60	65	65	63	80	80	80	80
AAG	31	24	26	29	14	18	19	14	31	17	41	35	35	35	19	19	17	19
GAU	54	58	49	50	58	44	54	58	49	54	34	42	42	52	45	47	53	47
GAC	15	15	18	18	11	22	16	11	19	11	35	24	24	19	19	18	12	18
GAA	58	62	60	57	55	65	52	55	59	63	54	60	60	53	64	60	63	61
GAG	15	13	14	17	20	12	22	20	17	13	24	20	20	22	13	16	13	15
UGU	37	40	43	41	43	37	39	43	39	41	38	34	34	32	36	37	36	37
UGC	8	4	1	4	4	8	6	4	4	2	10	12	12	11	4	3	5	3
UGA	79	82	84	85	86	78	87	86	84	85	73	72	72	79	84	84	86	85
UGG	16	13	11	10	8	17	8	8	9	7	19	22	22	12	8	8	6	7
CGU	17	12	20	20	23	16	13	23	15	15	15	10	10	27	16	16	19	16
CGC	3	1	2	1	5	2	3	5	1	1	2	1	1	0	0	1	2	1
CGA	30	35	31	33	23	29	36	23	33	38	28	38	38	28	33	35	35	35
CGG	7	7	3	2	4	9	3	4	6	4	10	7	7	2	7	4	1	4
AGU	36	27	30	30	24	43	23	24	34	27	15	22	22	37	22	26	26	26
AGC	5	4	3	5	7	7	6	7	7	2	11	9	9	5	5	3	2	3
AGA	77	81	85	84	93	74	93	93	80	90	75	82	82	65	78	78	81	78
AGG	15	11	13	10	13	13	13	13	14	6	26	13	13	14	11	8	8	8
GGU	37	58	58	59	56	55	51	56	52	44	45	33	33	54	47	45	52	45
GGC	17	13	16	13	13	17	10	13	13	6	21	22	22	13	10	15	8	15
GGA	86	100	90	90	98	88	103	98	93	123	88	96	96	95	108	113	113	114
GGG	65	38	40	44	30	43	35	30	41	30	60	58	58	45	39	33	32	32
